# Supplementary material for: Exposure to wildfire-related PM2.5 and site-specific cancer mortality in Brazil from 2010 to 2016: A retrospective study
Source: PLoS Med. 2022 Sep 19;19(9):e1004103. doi: 10.1371/journal.pmed.1004103 (PMC9529133; doi:10.1371/journal.pmed.1004103)
Supplement: S1 Data — (CSV) [file pmed.1004103.s002.csv]

citycode	year	PM	Death	Population	summer_mean	winter_mean	summer_sd	winter_sd	GDP
107982	2010	7.549557057	40	49439	24.45520857	24.93976613	1.029924965	1.960488883	5908.602678
107982	2011	7.782323736	44	51475	23.84787106	25.41482867	0.807449769	1.850252876	5582.573585
107982	2012	5.740885228	43	53505	23.97651284	24.93808102	1.013461781	1.721166388	6250.348913
107982	2013	6.128203261	45	55530	24.32814665	24.70560106	1.064563963	1.849154458	5975.104791
107982	2014	6.091328554	56	57558	23.92512681	24.86623048	0.746314124	1.539145343	5798.679402
107982	2015	7.702847617	49	59593	24.80782241	25.51716532	1.053712468	1.324181507	5183.250854
107982	2016	7.749938506	45	61715	24.84183823	25.05992209	1.094020465	1.584013006	5339.758015
148222	2010	5.865970657	18	27598	26.36084743	27.78419417	1.177708934	0.621768665	2042.980126
148222	2011	6.46345346	17	28118	25.78257981	27.6783137	0.988732144	0.760369918	2301.893862
148222	2012	4.896695907	24	28641	25.57353406	27.19517594	1.1478628	0.682583997	2573.985996
148222	2013	4.933781336	16	29171	26.0662871	27.67752314	1.033944551	0.733571224	2298.02963
148222	2014	4.024058256	31	29708	25.75701734	27.69862356	1.079895064	0.569925542	2455.684654
148222	2015	6.066693991	24	30265	26.3991642	27.87368253	1.267199091	0.804059433	2531.942683
148222	2016	6.395132251	19	30774	27.02180427	28.22459953	1.433981416	1.028731179	2416.172531
148610	2010	6.418753121	5	10461	25.80594899	27.4021845	1.097138065	0.683207388	2266.574602
148610	2011	7.105077706	8	10862	25.20046641	27.19464606	0.980306694	0.878497728	2392.177309
148610	2012	5.081235855	10	11270	25.00184094	26.7171587	1.189566565	0.79379999	2431.382403
148610	2013	5.390556909	7	11666	25.49873292	27.20082083	0.955943389	0.856334568	2686.747105
148610	2014	4.49914043	7	12075	25.05437768	27.06753046	1.017472404	0.66849144	2546.708098
148610	2015	6.367534159	6	12485	25.858446	27.47154202	1.2925371	0.942879536	2831.31863
148610	2016	7.00380477	7	12921	26.50928489	27.77440953	1.429377154	1.138299873	3016.673475
148622	2010	6.345388482	9	33330	25.60070764	26.90300223	1.115835991	0.738977853	1827.41716
148622	2011	6.859184639	13	34586	24.95738027	26.81318875	0.984002418	0.869893788	1892.85142
148622	2012	5.181874652	9	35823	24.88666139	26.32777473	1.223269493	0.727373177	1956.622926
148622	2013	5.831466512	10	37047	25.30143351	26.83622871	0.939816215	0.893136741	2130.114124
148622	2014	4.959763301	8	38279	24.82813729	26.66489999	0.995598914	0.713355539	2224.041861
148622	2015	6.658405205	12	39521	25.73739238	27.16563037	1.283547564	0.98626741	2307.818207
148622	2016	7.489825656	7	41078	26.28230226	27.29924983	1.427563033	1.095675453	2285.379739
167977	2010	5.835086188	5	1471	26.46461276	28.36961475	1.249072915	0.903167881	2115.562323
167977	2011	6.92667828	5	1491	25.69578386	28.24167947	0.983815406	1.132819779	2267.529618
167977	2012	5.972598973	5	1509	25.64095907	27.68071228	1.237261886	0.848617323	2370.727995
167977	2013	6.22210076	5	1530	25.9745437	28.20116309	1.04175423	1.035705793	2767.354991
167977	2014	5.331248571	5	1555	25.73611178	28.24870165	1.091492647	0.848278552	2640.005842
167977	2015	7.124764947	5	1574	26.48500452	28.35801997	1.348931528	1.088837817	3302.130433
167977	2016	7.904357551	6	1601	27.20567271	28.62713241	1.634138972	1.346589819	3833.38072
167982	2010	4.393300763	6	2965	26.59202131	28.19598791	1.095855771	0.682835992	3935.346128
167982	2011	4.643719331	6	3081	26.01632263	27.80694645	1.017705511	0.86863574	3587.694198
167982	2012	4.631943917	5	3202	25.80187302	27.78272447	0.977023214	0.797980893	4099.587597
167982	2013	4.671395664	6	3315	26.48168517	27.93345897	0.98363452	0.823310407	4825.408537
167982	2014	3.31987626	6	3431	26.19643192	28.11208233	1.112785959	0.652397928	3596.838919
167982	2015	5.785117415	5	3551	26.98038393	28.26383493	1.530466532	0.692600369	3995.034346
167982	2016	6.000302736	6	3673	27.18167064	28.50950088	1.263899905	0.906324759	4407.782633
167987	2010	5.168111167	8	3640	26.55712312	27.44435885	1.357356123	1.108783278	2568.648927
167987	2011	6.35023148	8	3670	25.65714058	27.44316968	1.100559342	1.202597546	2691.866775
167987	2012	6.278585378	6	3702	25.73763668	27.26131444	1.316501928	0.977783664	2615.789518
167987	2013	6.638141023	9	3736	26.08834102	27.70016352	1.278388009	1.07380724	2900.747712
167987	2014	5.80964741	8	3769	25.93828661	27.42099403	1.182525019	1.114629047	2817.038489
167987	2015	7.933837055	7	3805	26.88735028	27.58439022	1.483816057	1.227311928	2932.889681
167987	2016	8.026129618	6	3824	27.17788241	28.29938753	1.630467205	1.337162791	3502.259726
167992	2010	4.358421548	7	4329	25.84516991	25.52731878	1.407153826	1.213349861	2577.837571
167992	2011	5.16329947	9	4352	24.92820103	25.68957217	1.173324505	1.200094394	2835.443971
167992	2012	5.526222698	7	4376	25.20426618	25.73969861	1.326889704	1.275933303	3108.641529
167992	2013	5.488731423	5	4403	25.52996291	26.39112132	1.444805523	1.110113516	3237.105111
167992	2014	4.290467615	7	4431	25.62694684	26.15198775	1.285128197	1.153815592	3519.64998
167992	2015	5.813209627	7	4459	26.55525318	26.03538631	1.683477846	1.3599364	3636.521965
167992	2016	5.462390314	6	4477	26.67359102	26.92061678	1.63034448	1.566792458	3532.992798
168022	2010	5.140949417	7	5485	26.80763292	27.28063062	1.516737142	1.072538327	5358.94822
168022	2011	6.255307779	8	5529	25.85915072	27.12065344	1.214569987	1.370355223	7464.894027
168022	2012	6.156127499	11	5570	26.1005055	27.01931891	1.449963306	1.07678864	6552.353343
168022	2013	6.354079049	7	5616	26.27879132	27.3452918	1.488769462	1.081746621	6639.407788
168022	2014	5.713991587	8	5663	26.30007926	26.85801043	1.436360384	1.13635013	6535.415188
168022	2015	7.820784841	12	5709	27.60486831	27.10912995	1.863789456	1.338956314	6108.091709
168022	2016	7.57166536	8	5762	27.42762669	28.34303574	1.738539801	1.288272041	6564.076857
168052	2010	4.353818037	8	5778	26.52355306	28.06206391	1.053558106	0.663031435	1946.150984
168052	2011	4.415528094	10	5838	25.94233924	27.82701499	0.910439226	0.750195298	2063.67497
168052	2012	4.204197538	6	5894	25.6841001	27.56846708	0.976519775	0.742168932	2161.641192
168052	2013	4.271966746	6	5954	26.34008813	27.81570339	0.970000254	0.838677004	2228.647903
168052	2014	3.125540918	6	6018	26.08722261	27.81738047	0.990099351	0.578879011	2131.645995
168052	2015	5.238934959	8	6080	26.74211023	27.89304302	1.339534595	0.734243492	2075.454109
168052	2016	5.522132826	8	6124	27.04333663	28.04946668	1.1933023	0.934151812	2296.061594
168057	2010	4.383321281	6	1926	26.10896244	27.66925661	1.038870956	0.693365347	2475.829318
168057	2011	4.580434562	5	1973	25.54589668	27.52381337	0.885322202	0.797905994	1892.168803
168057	2012	4.297348657	5	2021	25.30242338	27.20675529	0.954899339	0.823011075	1939.501859
168057	2013	4.343532428	5	2070	25.98010987	27.4622002	0.955121376	0.911909862	2244.311886
168057	2014	3.167506866	6	2118	25.71324208	27.51327955	1.006638358	0.598187079	2238.614043
168057	2015	5.376292619	5	2168	26.39159027	27.69041876	1.370465137	0.739630581	2765.271255
168057	2016	5.569205719	6	2212	26.70811287	27.78588879	1.264221992	1.040474632	2676.247196
168062	2010	4.81346472	5	2571	25.76149967	25.96558925	1.248588396	1.089978573	2373.049643
168062	2011	5.796195237	5	2642	25.01730602	25.97368007	1.062742242	1.05475255	3273.608506
168062	2012	5.789372816	6	2708	25.08065505	25.9299847	1.246789053	1.098727332	3331.198786
168062	2013	5.965816467	6	2778	25.44483656	26.73727841	1.228409725	0.971310312	3432.087959
168062	2014	4.983209549	6	2849	25.3250482	26.18290721	1.035069058	0.958703269	3904.205101
168062	2015	6.826501512	6	2921	26.27448949	26.57460723	1.502737301	1.201450444	3467.930072
168062	2016	7.147616867	6	2984	26.52628411	27.1012672	1.55757131	1.421723555	3253.131483
168082	2010	4.517796397	6	3634	26.34026921	27.84930198	1.070226826	0.646546276	1842.652765
168082	2011	4.768408207	6	3680	25.81685637	27.68718467	0.825366257	0.7541877	1998.242882
168082	2012	4.284918932	5	3728	25.52308021	27.05444985	0.995367976	0.699775202	2026.640504
168082	2013	4.302926406	5	3784	26.10061004	27.52647136	0.934564658	0.75770772	2175.537331
168082	2014	3.475959674	6	3835	25.84974612	27.6289734	0.957529089	0.611540397	2201.230245
168082	2015	5.156399242	8	3888	26.3895648	27.82899828	1.26912174	0.743197247	2228.902183
168082	2016	5.248004773	7	3919	26.89568632	27.83568567	1.338774844	0.976756806	2243.338534
168142	2010	6.210776745	8	3766	26.54875545	28.32542166	1.170990889	0.660184688	1826.55242
168142	2011	7.112001059	7	3883	25.86101157	28.06439325	0.955300196	0.907215466	2070.296942
168142	2012	5.504281776	8	3999	25.73028969	27.64609104	1.145359204	0.819343552	2244.954858
168142	2013	5.66318501	7	4118	26.14637103	28.11026535	1.026312083	0.855120354	2276.523249
168142	2014	4.759243877	6	4240	25.84108305	28.0036602	1.04229197	0.690791904	2486.975877
168142	2015	6.885046012	6	4360	26.5379227	28.20091547	1.276248262	0.928272264	2448.883242
168142	2016	7.622429883	6	4483	27.22147074	28.69482723	1.526129305	1.079837865	2820.047132
168152	2010	5.165384816	7	6026	26.58977986	26.8697468	1.434020083	1.173506353	3448.242257
168152	2011	6.2050926	12	6051	25.70284444	26.99301904	1.104225261	1.515187554	3434.076108
168152	2012	5.986517489	10	6086	25.9106541	26.84353621	1.443484545	1.200909855	3611.039378
168152	2013	6.1937478	8	6115	26.03726667	26.82500195	1.370085684	1.065417093	3572.13872
168152	2014	5.560062475	8	6154	26.00918981	26.47658667	1.311355542	1.1407637	3842.926454
168152	2015	7.581743288	5	6189	27.21718234	26.59085862	1.770425566	1.422511927	4046.823689
168152	2016	7.588606926	8	6238	27.03638346	27.9069844	1.633489081	1.453092375	4290.269818
168162	2010	4.837876002	288	95753	26.15350058	27.98702371	1.120047666	0.738151621	4093.155017
168162	2011	5.140908101	260	98440	25.58682076	27.82221316	0.870560699	0.871136452	4070.555588
168162	2012	4.42309764	314	101133	25.33972877	27.34690797	1.051400029	0.795341514	4315.43592
168162	2013	4.451839647	300	103780	25.90572524	27.76321955	0.993718616	0.879805491	4584.93473
168162	2014	3.528550666	306	106478	25.72575314	27.8542356	1.030602519	0.722014944	4454.085618
168162	2015	5.718662991	290	109219	26.29736401	28.11375843	1.375336996	0.816531903	4547.064321
168162	2016	6.025720715	278	111943	26.77647445	28.16786217	1.420961756	1.206730908	4536.301811
168167	2010	4.487801995	7	2864	26.36191393	27.81675707	1.050129316	0.646642993	2301.229537
168167	2011	4.728156961	6	2958	25.84280838	27.6497041	0.82346979	0.735578905	2356.882488
168167	2012	4.255103163	6	3048	25.57525209	27.11082479	0.990801967	0.676268587	2407.646505
168167	2013	4.287162107	8	3144	26.18663083	27.55205006	0.938296903	0.795989082	2439.101898
168167	2014	3.408729505	7	3235	25.90375346	27.62647697	0.953564515	0.571480791	2382.880112
168167	2015	5.176000713	5	3331	26.49197893	27.81436919	1.301875135	0.706427823	2401.509347
168167	2016	5.323262966	6	3425	26.94605825	27.85222069	1.299803936	0.976131006	2476.716827
168172	2010	4.17997042	15	17862	26.62981624	28.01724095	1.031929598	0.696202588	1920.140341
168172	2011	4.046130086	12	18367	25.97229605	27.61886543	0.928527621	0.872140046	1859.128953
168172	2012	4.021702844	11	18875	25.72988822	27.71035339	0.926704019	0.729611377	1987.640674
168172	2013	4.130942596	14	19388	26.33592998	27.54721379	0.903723095	0.792056987	2224.981421
168172	2014	2.89834896	12	19901	26.14586534	27.78889848	0.974527151	0.54250122	2200.245042
168172	2015	5.26628579	12	20417	26.8438523	28.06635447	1.390095965	0.737898865	2156.112482
168172	2016	5.628188747	9	20960	27.09661226	28.15254755	1.09153349	0.95024841	2234.940627
168192	2010	4.045088366	8	6513	25.63133875	25.48079693	1.498284758	1.123124485	3426.188269
168192	2011	4.859280544	8	6599	24.70057811	25.55495449	1.237438146	1.206707455	2817.001632
168192	2012	5.004900238	7	6689	25.19862806	25.7781191	1.544015078	1.08530754	3142.939016
168192	2013	4.647614859	10	6781	25.21321049	26.04150341	1.606504568	0.997823329	3788.156283
168192	2014	3.804679759	11	6872	25.32430426	25.80241446	1.384296304	1.174895742	3107.401341
168192	2015	5.496864076	11	6970	26.57709165	25.75542665	1.957686204	1.302942612	2675.525692
168192	2016	4.903506218	9	7057	26.33727241	26.56267876	1.777271539	1.401901328	2750.296764
168207	2010	4.25082517	21	9400	26.95644196	28.1348865	1.031159513	0.713150022	1981.213405
168207	2011	4.010534146	17	9673	26.29356811	27.63672154	0.915538242	0.883711435	2135.810711
168207	2012	4.007055211	10	9949	26.0634786	27.99109243	0.945734232	0.684980132	2323.524666
168207	2013	4.164912138	16	10227	26.63903091	27.7374142	0.890692341	0.723626638	2521.179504
168207	2014	2.915760672	17	10508	26.46804664	27.86370306	0.99348811	0.497634649	2420.707496
168207	2015	5.45000231	18	10786	27.21009883	28.09751828	1.48077614	0.650283947	2416.745342
168207	2016	5.885022177	23	11052	27.43550091	28.67117867	1.065086564	0.888650244	2572.247921
168222	2010	3.474028669	5	2282	25.4477862	24.92260717	1.294948011	1.169012726	1966.780329
168222	2011	4.236296268	6	2320	24.56087439	25.12471977	1.181440058	1.142484207	2092.741636
168222	2012	4.813157331	5	2357	25.09037916	25.31447225	1.611338499	1.055274369	2152.504974
168222	2013	4.420728643	5	2398	25.15843991	25.90487162	1.610611598	1.088222443	2278.759099
168222	2014	3.381860831	5	2437	25.2011919	25.5705922	1.295822447	1.186445936	2271.99576
168222	2015	4.882266916	7	2478	26.65931859	25.39884019	1.940755243	1.311183097	2283.897448
168222	2016	4.329347644	7	2523	26.22398951	26.20474128	1.698237107	1.426160983	2311.94176
168242	2010	4.115387201	6	5335	26.57975277	27.91551261	1.014156684	0.667749621	1753.702713
168242	2011	4.013862145	6	5449	25.94218928	27.42838435	0.936513944	0.837068015	1821.007396
168242	2012	4.100794585	7	5565	25.72378515	27.62778002	0.904563982	0.699174275	1922.942638
168242	2013	4.231648451	9	5679	26.31080637	27.45549482	0.884388711	0.796530325	2156.717619
168242	2014	2.876247148	8	5796	26.09049416	27.61103434	0.985831419	0.521872485	2116.556704
168242	2015	5.281960353	6	5913	26.83462784	27.91092422	1.420398177	0.675313538	2129.392724
168242	2016	5.652532081	6	6011	27.07405752	28.22174834	1.079875007	0.92329989	2219.194811
168252	2010	4.487358012	8	6754	26.32404841	27.60696412	1.079054334	0.88062997	1745.338372
168252	2011	4.74501779	7	6845	25.80947215	27.42286015	0.873501611	0.849897887	1730.050084
168252	2012	4.33678984	6	6933	25.59475448	27.27061972	0.99186935	0.736753168	1617.993363
168252	2013	4.396568275	7	7023	26.23490938	27.69692934	0.974515861	0.756750409	2058.353223
168252	2014	3.440178071	7	7122	25.96985233	27.70515002	1.023267746	0.687460089	2066.061374
168252	2015	5.644407083	8	7215	26.56370733	27.97536957	1.318653239	0.713759021	1924.654405
168252	2016	5.875422309	5	7313	26.99081736	28.06771661	1.401991763	0.987458514	1955.870944
168257	2010	4.73467104	5	1929	25.94085482	27.50373739	1.203578039	0.733294165	4510.168263
168257	2011	5.246153455	5	1965	25.34087037	27.12706583	0.956337497	0.81612141	6459.812811
168257	2012	4.603943948	5	2001	25.16547913	26.88431236	1.104873934	0.756303325	4920.856313
168257	2013	4.578436369	5	2039	25.70512653	27.34634949	1.028674808	0.78472996	6497.102935
168257	2014	3.745076845	6	2076	25.45205818	27.33061357	1.070259145	0.639617414	6592.949083
168257	2015	5.48365024	7	2111	26.02793798	27.53762039	1.276372611	0.867892699	5701.528727
168257	2016	5.550541874	7	2170	26.6336745	27.72523303	1.496264197	1.182553474	4973.885852
168259	2010	5.245916671	6	2271	26.7247654	28.6191563	1.250434059	0.92251852	1920.669139
168259	2011	6.012060598	5	2339	26.05519221	28.19637621	0.985257306	0.939301521	2112.610471
168259	2012	5.529656431	5	2406	25.90388227	28.30808018	1.093717481	0.789541044	2536.370022
168259	2013	5.403305756	5	2475	26.55294109	28.50321994	1.098838893	0.857531728	2645.399505
168259	2014	4.114681784	5	2544	26.3321226	28.51720864	1.169633127	0.858751689	2808.183916
168259	2015	6.364577883	8	2616	26.9537645	28.88854023	1.511987637	0.911626858	2459.045068
168259	2016	6.447799792	5	2691	27.48411936	28.96700425	1.605844574	1.222443052	2535.863883
168262	2010	4.972420334	6	3481	26.2577957	27.71918715	1.313896935	0.983098361	2216.808485
168262	2011	6.227143132	5	3536	25.46348092	27.71994258	1.081504903	1.067923137	2510.690194
168262	2012	6.074831343	10	3592	25.46231061	27.42397976	1.311289513	0.857188131	2396.409594
168262	2013	6.261659698	6	3648	25.76973857	27.98235511	1.13462387	0.963159648	2528.509862
168262	2014	5.310152381	9	3710	25.63652579	27.85980216	1.13619918	0.88760062	2436.764835
168262	2015	6.936616434	5	3767	26.47610296	28.00636629	1.469358484	1.076876384	2452.102652
168262	2016	7.701231566	7	3822	27.02608114	28.56369724	1.688440003	1.28563376	2635.351066
168282	2010	5.702339678	5	2188	26.49043356	28.39030445	1.247695423	0.942288082	2381.575733
168282	2011	6.619000388	5	2281	25.8152507	28.16426378	1.022154829	1.074167901	2465.161946
168282	2012	5.990396958	5	2377	25.67856435	27.82061012	1.158262592	0.814301407	3104.816551
168282	2013	5.96361165	5	2472	26.18151569	28.32708427	1.131475075	0.954055872	2768.246204
168282	2014	4.699659954	6	2566	25.97368772	28.43402739	1.132048743	0.980410999	3994.878088
168282	2015	6.817898911	5	2659	26.66405515	28.35652996	1.364668298	0.917923457	3057.410273
168282	2016	7.029156155	7	2760	27.30044371	28.91397045	1.613058244	1.17629453	2772.408701
168312	2010	4.601663657	6	1280	25.90277331	27.32254017	1.16740614	0.864546706	2856.165754
168312	2011	5.23267367	6	1303	25.35162629	26.96329749	0.926412388	0.81564864	2990.310609
168312	2012	4.732976403	6	1328	25.18689242	26.74482474	1.107619003	0.674074429	3526.864953
168312	2013	4.774660764	5	1354	25.70351216	27.21249627	1.009827421	0.742303875	3819.301838
168312	2014	3.999618291	5	1376	25.4088129	27.17271147	1.059298113	0.645342126	3920.117845
168312	2015	5.722983642	5	1402	26.08800663	27.40913566	1.311896146	0.872139179	4105.427301
168312	2016	5.935979912	5	1428	26.68459803	27.70092337	1.520864201	1.047496324	3729.933313
168322	2010	5.567428613	6	3191	26.35965149	27.06707319	1.332347278	1.164711646	2914.660149
168322	2011	6.504925197	8	3263	25.48655433	27.08905051	1.08433418	1.174774115	3603.056007
168322	2012	6.360479666	8	3333	25.5640841	26.84446953	1.268039449	1.078666162	3601.094989
168322	2013	6.579912689	7	3404	25.90259009	27.42732786	1.253258721	1.056002274	3754.337089
168322	2014	5.467126742	5	3480	25.87203099	27.26243569	1.204502253	1.146303381	4036.727158
168322	2015	7.509313901	5	3553	26.68227532	27.34588627	1.456345466	1.269107673	3953.098826
168322	2016	7.458643083	6	3607	27.13806256	28.03943177	1.728183413	1.41232908	3382.064046
168332	2010	4.450126215	6	5725	27.11030083	28.68601423	0.993806438	0.812248153	1569.936062
168332	2011	4.127230639	9	5940	26.48512535	27.94927781	0.9105012	0.895462322	1585.979886
168332	2012	4.013269211	8	6153	26.26512185	28.38079832	0.94316534	0.713740567	1595.217861
168332	2013	4.15835608	8	6370	26.85616124	28.07815601	0.934290914	0.77612375	1651.595196
168332	2014	2.918311529	9	6589	26.61050762	28.19637206	0.935647371	0.476179088	1564.446
168332	2015	5.483269757	10	6808	27.3397181	28.32996793	1.432691675	0.735270097	1579.082615
168332	2016	5.852820326	9	7007	27.58226371	28.87090941	1.032968759	0.89893709	1650.975064
168334	2010	4.789551535	5	1202	26.55655783	28.64960076	1.075785589	0.774744333	1896.602607
168334	2011	4.832695436	5	1231	25.90132766	28.04913514	0.981996983	0.915446046	1880.11798
168334	2012	4.625291926	6	1255	25.68845959	28.19775191	0.940851259	0.964413837	1930.058426
168334	2013	4.725862158	5	1284	26.32004401	27.87529976	0.957246805	0.914982909	2089.527443
168334	2014	3.092168371	6	1312	26.08312591	28.18965279	1.0553924	0.622382278	2363.88432
168334	2015	5.89992779	6	1342	26.88509236	28.42313696	1.509835372	0.897153879	2206.370806
168334	2016	6.35497563	5	1374	27.07456083	28.7568609	1.159523572	1.108645717	2408.351296
168336	2010	4.195903571	6	4100	25.72597467	27.18819771	1.243780052	0.989772525	6162.018252
168336	2011	4.80989545	5	4281	24.97341636	26.82249578	0.973611928	0.913154351	7197.34884
168336	2012	4.671352285	6	4463	24.88827826	26.97114324	1.026189926	0.740074099	8982.703389
168336	2013	4.606948316	5	4647	25.48205847	27.3699299	1.047685933	0.870689367	8308.663077
168336	2014	3.661664571	7	4832	25.4708191	27.40479905	1.221713007	0.789498407	10160.72206
168336	2015	5.141945442	6	5015	26.01617854	27.57466766	1.440952672	0.886991757	7538.195655
168336	2016	4.951019673	5	5227	26.44050186	27.9050761	1.51041088	1.117175597	5904.53427
168338	2010	5.87907605	5	2543	26.57757141	27.31538497	1.394481751	1.112128121	5296.988642
168338	2011	7.030805767	6	2607	25.65214265	27.15683213	1.113817394	1.342297492	7006.697296
168338	2012	6.814697313	6	2669	25.80956298	27.14423104	1.412425925	1.013117281	7353.475883
168338	2013	7.216233345	5	2732	26.07015578	27.4439699	1.33216555	1.109696887	8185.055459
168338	2014	6.278834568	5	2794	25.96874049	26.95421924	1.300873822	1.16851559	13287.82991
168338	2015	8.620535847	5	2858	27.0698658	27.22185657	1.61361831	1.317458417	15539.23777
168338	2016	8.576872213	5	2925	27.15895993	28.37450715	1.586451	1.351133417	14427.4295
168340	2010	4.542116923	5	1369	26.03666398	27.52911404	1.059527123	0.718216918	2817.451516
168340	2011	4.689126725	6	1409	25.50469454	27.41534614	0.819541645	0.799489496	2849.061313
168340	2012	4.177978948	5	1446	25.26866307	26.93992275	0.984849535	0.728487074	2857.842538
168340	2013	4.274058838	5	1487	25.86974268	27.36817267	0.959497436	0.846664719	3207.669018
168340	2014	3.275555964	5	1527	25.63887112	27.51705545	0.967034652	0.611827653	3280.694138
168340	2015	5.376680874	5	1567	26.21012575	27.73003739	1.318599208	0.739678615	2886.959126
168340	2016	5.755988862	6	1602	26.66894655	27.70507374	1.366085051	1.083205055	2890.779289
168341	2010	4.526583017	6	1982	27.0649291	28.74909732	1.026436795	0.85649384	1606.54755
168341	2011	4.226211192	6	2032	26.40086835	27.99952979	0.914174148	0.933782633	1663.836194
168341	2012	4.166693543	5	2079	26.20702563	28.53332843	0.953319315	0.7467118	1724.36207
168341	2013	4.324364801	5	2132	26.80011709	28.10022545	0.934477809	0.805414328	1825.861246
168341	2014	2.91134337	6	2179	26.54620868	28.21642549	0.970332776	0.51420631	1809.594897
168341	2015	5.596367707	7	2229	27.35766597	28.38672329	1.547440098	0.737130998	1725.707428
168341	2016	6.013273029	5	2284	27.5686085	29.14681518	1.052658637	0.930600362	1779.736071
168342	2010	6.193117273	5	2780	26.4913035	27.95863013	1.167623539	0.881292423	1941.354475
168342	2011	7.048673113	6	2871	25.7627969	27.89459236	0.937708399	0.964272578	2122.908075
168342	2012	5.728985851	7	2959	25.75422579	27.2059818	1.185239271	0.796655379	2500.708053
168342	2013	6.181848888	5	3049	26.09168303	27.88775952	1.000284958	0.966744999	2959.132598
168342	2014	5.233451505	5	3138	25.72200581	27.77236801	1.042105953	0.766229373	3238.786249
168342	2015	7.208646122	5	3230	26.51951862	27.98844439	1.303519086	1.038250975	2902.294041
168342	2016	8.340687592	7	3329	27.15923246	28.37423339	1.504526751	1.23498517	6433.364675
168362	2010	4.98091221	5	1566	26.21406357	27.44333124	1.208331827	1.106722687	1852.867899
168362	2011	5.858009735	8	1606	25.4983187	27.21358371	0.9392015	1.049988219	1927.705749
168362	2012	5.470663482	5	1644	25.39311626	27.06400495	1.102215486	0.831575628	2165.601788
168362	2013	5.34331239	5	1685	25.95736964	27.55042721	1.060098323	0.954917605	1911.93107
168362	2014	4.269448381	6	1728	25.78417042	27.69717193	1.06097668	0.973865454	2175.970327
168362	2015	5.891013419	5	1769	26.42153187	27.51560337	1.361939273	1.022789065	2248.994272
168362	2016	5.724480037	5	1820	27.02168255	28.05028529	1.506062406	1.187019197	2209.108229
168412	2010	5.542184887	5	889	26.4597403	27.51741955	1.250239434	1.044240327	2592.690575
168412	2011	6.681188157	5	903	25.64145955	27.52833865	0.979164744	0.982882154	2721.067631
168412	2012	6.283486229	5	921	25.62354716	27.14878476	1.216460653	0.887898681	2800.456798
168412	2013	6.716882714	5	936	25.93044659	27.57558549	1.015023817	0.935632479	2897.412177
168412	2014	5.677317332	5	952	25.75698108	27.5282782	1.087097151	0.847534619	3012.089078
168412	2015	7.649466014	6	969	26.59748403	27.81206348	1.462466346	1.054170159	3149.601869
168412	2016	8.686817762	5	982	27.14350409	28.05743418	1.606276541	1.275632155	3218.186023
168462	2010	5.310973092	5	1979	25.94786526	26.66582644	1.39330881	1.112334481	2620.98127
168462	2011	6.149298557	6	2009	25.05905814	26.50201754	1.095462975	1.133623592	2774.224274
168462	2012	6.063510882	6	2045	25.22830975	26.55016545	1.301195758	1.013375925	3450.326646
168462	2013	6.287097833	5	2082	25.57323143	26.97341414	1.39468476	1.107413784	3395.092189
168462	2014	5.073756798	5	2117	25.68711041	26.90351581	1.312946994	1.088551669	4113.66367
168462	2015	6.927334417	7	2154	26.40044138	26.89091521	1.614006458	1.225936418	4074.786697
168462	2016	6.641898424	5	2187	26.70621843	27.6068788	1.604320246	1.382253917	3777.70196
168502	2010	4.60568933	10	19505	25.92628866	27.2523264	1.163194561	0.849595766	3168.00418
168502	2011	5.149952138	17	19986	25.36661421	26.95740206	0.88528247	0.792284769	3279.375748
168502	2012	4.513681249	20	20464	25.19218343	26.74031852	1.070291139	0.683535335	3554.946159
168502	2013	4.520177778	14	20953	25.71984595	27.15652624	0.980850743	0.703239264	3719.428634
168502	2014	3.785058218	18	21441	25.46693568	27.15178894	1.022914747	0.674008127	3584.51653
168502	2015	5.450016834	17	21933	26.08309052	27.38895732	1.301716311	0.889027646	3819.223509
168502	2016	5.581799214	19	22423	26.65044354	27.54178445	1.446770569	1.110865423	3827.217157
168507	2010	3.484135261	5	2958	25.4477862	24.92260717	1.294948011	1.169012726	1965.256146
168507	2011	4.259054427	6	3002	24.56087439	25.12471977	1.181440058	1.142484207	2277.660944
168507	2012	4.738217232	7	3049	25.09037916	25.31447225	1.611338499	1.055274369	2347.996776
168507	2013	4.310590904	7	3092	25.15843991	25.90487162	1.610611598	1.088222443	2557.289272
168507	2014	3.419719537	5	3136	25.2011919	25.5705922	1.295822447	1.186445936	2544.995021
168507	2015	4.929604777	5	3183	26.65931859	25.39884019	1.940755243	1.311183097	2486.718059
168507	2016	4.347285179	7	3229	26.22398951	26.20474128	1.698237107	1.426160983	2515.539833
168512	2010	4.518248481	5	2314	26.29597211	26.32065742	1.363578286	1.033552876	1891.995843
168512	2011	5.201567514	5	2361	25.45350827	26.06169778	1.158896786	1.249081685	1960.649332
168512	2012	5.505651978	5	2413	25.77119758	26.54465884	1.366263631	1.005901766	2029.192334
168512	2013	5.488453643	6	2458	25.93642749	26.88870505	1.495279748	0.995987727	2196.092563
168512	2014	4.092650133	6	2509	26.02718213	26.61085166	1.276588246	1.106297412	2185.121441
168512	2015	5.721590085	5	2563	27.01904905	26.63818386	1.69635819	1.135254109	2210.105053
168512	2016	5.234185553	8	2604	27.03998206	27.41847303	1.609502717	1.253331746	2484.864636
168552	2010	5.880202389	7	3020	26.62204554	28.65909398	1.220412305	0.645364399	2388.748723
168552	2011	6.80244547	6	3091	25.95989197	28.30435574	0.988931113	0.876752115	2345.677644
168552	2012	5.562836041	7	3162	25.78428629	27.92078751	1.181159403	0.824610712	2563.003715
168552	2013	5.47150072	5	3236	26.25229164	28.41891973	1.073109651	0.831958232	2721.613866
168552	2014	4.4788947	5	3308	26.02274745	28.35992858	1.107431873	0.625933954	2674.995253
168552	2015	6.854969061	5	3383	26.73030214	28.53300888	1.334715425	0.860529953	3174.093669
168552	2016	7.326376369	6	3455	27.32904327	28.85545872	1.557496766	1.141565804	2963.148449
168562	2010	5.896400976	6	4718	26.48605526	27.70154816	1.291717487	1.030146981	2344.037294
168562	2011	7.011561212	10	4786	25.63787283	27.6965003	1.025120532	1.098798981	2466.31131
168562	2012	6.460829878	7	4856	25.67927968	27.35783623	1.227522406	0.953062886	2595.430228
168562	2013	7.025534161	7	4931	25.9782767	27.84911436	1.146864988	0.987425147	2913.073555
168562	2014	5.843628448	8	5005	25.82171608	27.73297105	1.121115405	0.922641392	2873.023508
168562	2015	7.810795625	8	5081	26.67461436	27.95833086	1.425152528	1.110983078	2993.51217
168562	2016	8.924089639	7	5138	27.1235281	28.2312518	1.582549709	1.283224497	3176.901312
168577	2010	5.414059207	6	1007	26.55712312	27.44435885	1.357356123	1.108783278	3758.198785
168577	2011	6.659928858	7	1030	25.65714058	27.44316968	1.100559342	1.202597546	3793.5121
168577	2012	6.502790737	5	1049	25.73763668	27.26131444	1.316501928	0.977783664	4292.059824
168577	2013	6.89566773	5	1072	26.08834102	27.70016352	1.278388009	1.07380724	3955.558429
168577	2014	6.021768947	5	1097	25.93828661	27.42099403	1.182525019	1.114629047	4342.132737
168577	2015	8.284697657	6	1119	26.88735028	27.58439022	1.483816057	1.227311928	5016.689078
168577	2016	8.553534482	5	1146	27.17788241	28.29938753	1.630467205	1.337162791	4784.061751
168602	2010	4.371845636	6	3154	25.88711389	27.31959516	1.039097983	0.759743645	2357.191922
168602	2011	4.708938613	7	3239	25.35963308	27.21721507	0.917977617	0.835647872	2464.368476
168602	2012	4.416515437	8	3323	25.12781572	26.9553902	0.945127123	0.801284601	2774.628509
168602	2013	4.40651515	7	3411	25.79846957	27.23926299	0.933473909	0.853473927	3047.175078
168602	2014	3.327480562	5	3501	25.51075868	27.35020828	1.024428245	0.624764316	2994.848025
168602	2015	5.308406781	5	3589	26.16127087	27.6072208	1.33911333	0.671977876	2838.969226
168602	2016	5.369277582	5	3688	26.48399684	27.69945384	1.308667655	1.002839686	4276.537185
168652	2010	3.980676702	13	11193	25.11049654	24.85890075	1.19217284	1.132014757	4303.000743
168652	2011	4.766710388	12	11544	24.23120877	24.99104479	1.025210027	1.198176811	4221.125237
168652	2012	5.459687558	14	11897	24.58203026	25.22178714	1.264661861	1.063688829	4308.558156
168652	2013	5.283897211	12	12251	24.82488686	25.84329484	1.27600606	1.127211247	3964.084889
168652	2014	3.971636044	14	12606	24.92807896	25.57652846	1.143076632	1.157461584	4313.993182
168652	2015	5.396542108	9	12964	25.76492481	25.4357407	1.514565391	1.281161661	2651.180024
168652	2016	5.016821411	7	13347	25.90795022	26.23699969	1.484623561	1.489440658	2722.540061
168662	2010	5.732672669	9	4094	26.42948351	27.60793289	1.229319579	1.023132141	2509.943013
168662	2011	6.821191355	5	4177	25.65223313	27.64048945	0.966728333	1.087675864	2719.778242
168662	2012	6.027917493	10	4261	25.59056935	27.08881905	1.218078519	0.880573896	2852.536834
168662	2013	6.356054605	7	4348	25.91458854	27.59034574	1.007012827	0.96654527	2859.460047
168662	2014	5.45699155	7	4440	25.70448935	27.64570258	1.059876837	0.861206635	2937.24796
168662	2015	7.335295512	7	4527	26.45632991	27.7783299	1.335786426	1.069585857	3224.489133
168662	2016	8.304140153	9	4615	27.10642178	27.99642377	1.538929927	1.315449899	3503.933933
168672	2010	5.510106175	5	4780	26.18813482	28.59946698	1.265423155	0.856464054	2023.949618
168672	2011	6.69969896	7	4826	25.41428727	28.40187441	0.996903699	1.211379956	2208.214832
168672	2012	5.841893025	6	4871	25.35157395	27.96206498	1.248183464	0.93021938	2277.290038
168672	2013	5.91119938	5	4916	25.7022975	28.46988625	1.08736836	1.067808844	2470.442895
168672	2014	4.968929788	11	4966	25.54416898	28.3413203	1.126181114	0.844796489	2362.568265
168672	2015	6.582646078	6	5015	26.22849819	28.48592948	1.362501648	1.123651584	2455.778446
168672	2016	7.213370313	8	5083	26.95790608	29.02382948	1.663842571	1.342072095	2596.490855
168682	2010	6.176720788	6	2978	26.88573939	27.76635739	1.382500865	1.081062276	3777.493692
168682	2011	7.307504281	5	3012	25.98239411	27.54848982	1.090340798	1.263413602	4373.09221
168682	2012	6.854156879	6	3046	26.06092714	27.50875118	1.344528479	0.977255773	4219.188735
168682	2013	7.426207246	7	3081	26.37948544	27.85123549	1.259355659	1.069634642	4319.131706
168682	2014	6.342736991	7	3120	26.18545784	27.44921364	1.199944178	1.099427056	4808.430298
168682	2015	8.743052285	7	3158	27.31942756	27.82614199	1.591373094	1.249974047	5536.435021
168682	2016	9.206411239	5	3196	27.46804091	28.48248574	1.614411146	1.292416983	5495.19886
168707	2010	5.05531139	5	2413	26.11386466	27.06074237	1.311619246	1.126716356	2771.810024
168707	2011	6.120547969	8	2443	25.24102528	27.18852973	1.067140603	1.147415368	2871.52351
168707	2012	6.014359835	5	2472	25.32291529	26.86230941	1.267766087	1.026807702	2745.943942
168707	2013	6.309673338	6	2500	25.6253531	27.40521516	1.162934847	1.026590571	2943.429526
168707	2014	5.264179233	6	2534	25.54346247	27.25509909	1.166634938	1.01212553	3293.496875
168707	2015	6.992967427	5	2565	26.3614257	27.43647108	1.452136522	1.253281469	3524.72389
168707	2016	7.699159807	6	2602	26.84542709	27.97805169	1.730523971	1.460736781	3225.781964
168717	2010	5.61247801	6	3621	26.75345196	27.36230458	1.431166541	1.093059613	4059.747423
168717	2011	6.694746438	7	3651	25.82612747	27.18730073	1.149994931	1.346834313	4572.156867
168717	2012	6.43615612	6	3677	26.02314188	27.12822986	1.44432441	1.035228566	5532.063992
168717	2013	6.780428102	5	3705	26.24074152	27.46011483	1.38735846	1.099880768	5673.692329
168717	2014	6.069373359	6	3742	26.18054739	26.95762133	1.358468393	1.160343787	5964.404272
168717	2015	8.353593797	6	3772	27.35082188	27.237326	1.698536233	1.336662244	5730.672036
168717	2016	8.231723492	5	3814	27.37859733	28.37791712	1.673798378	1.271785763	4521.312489
168722	2010	4.564634185	7	5037	26.52016297	27.8483452	1.104853911	0.919016173	2183.72128
168722	2011	4.948938821	7	5126	25.97283358	27.5640635	0.875788756	0.89061538	2110.253399
168722	2012	4.555913983	7	5222	25.80232915	27.47649286	1.031350279	0.714033287	2248.857332
168722	2013	4.578869549	7	5319	26.39730478	27.86837062	1.012489561	0.694567382	2325.042248
168722	2014	3.688719215	9	5415	26.16642043	27.87238103	1.030110078	0.716094164	2366.977171
168722	2015	5.872016567	5	5514	26.7600348	28.23810842	1.371944827	0.76899328	2288.44554
168722	2016	6.020801563	5	5604	27.22168515	28.18979047	1.434874009	0.99112632	2282.281422
168772	2010	7.392830383	10	11448	27.11070672	27.55909917	1.423978098	1.157433058	3621.66313
168772	2011	8.511783398	10	11598	26.24671058	27.42885082	1.08268295	1.334082782	3713.476667
168772	2012	7.85041489	11	11748	26.33701291	27.45429878	1.36721999	1.077646343	3916.434255
168772	2013	8.893353093	10	11902	26.59173139	27.65234928	1.32645806	1.104002262	4512.738646
168772	2014	7.765825784	9	12058	26.41632185	27.15294164	1.257705923	1.143854048	4267.183786
168772	2015	10.47793322	9	12251	27.58272751	27.4787607	1.64219808	1.339091846	4285.127509
168772	2016	10.89819229	9	12401	27.61228465	28.47322818	1.645743611	1.339154698	4080.634264
168777	2010	5.519043299	5	1495	26.10005546	27.78729828	1.185686132	0.951378729	7606.619847
168777	2011	6.504544487	5	1522	25.47959058	27.71646729	1.023471934	1.016072082	8235.78496
168777	2012	5.755366895	5	1551	25.40623595	27.30812868	1.220658686	0.780579506	8983.674856
168777	2013	5.697945062	5	1581	25.82308363	27.83585412	1.139923717	0.875627497	10766.99381
168777	2014	4.822902718	5	1605	25.57011739	27.75675675	1.142204007	0.899707642	11630.47829
168777	2015	7.199960981	7	1636	26.39918846	27.82862819	1.42482436	0.985668837	12216.46219
168777	2016	7.632794386	5	1668	26.93279922	28.48145391	1.633650063	1.146363851	10821.9704
168782	2010	5.908599784	5	3094	26.35489837	28.65252234	1.241258062	0.697723627	2111.126641
168782	2011	6.99384419	5	3141	25.61098984	28.32280685	0.980069629	1.007767862	2181.540244
168782	2012	5.81769364	8	3197	25.46297991	27.90853584	1.196859211	0.913438451	2230.341339
168782	2013	5.782135953	8	3245	25.91145515	28.40976912	1.088053594	0.940750023	2370.944938
168782	2014	4.782492925	6	3303	25.75604574	28.35691623	1.141200105	0.767097307	2449.967045
168782	2015	7.249144174	7	3352	26.41732905	28.50635151	1.34379577	0.91854988	2428.381982
168782	2016	7.799234632	5	3408	27.0900562	28.89028921	1.615948151	1.298910395	2640.003709
168852	2010	4.909083869	5	6586	26.45389026	28.29259995	1.228051938	0.96808345	1990.62912
168852	2011	5.702836524	6	6737	25.73218669	27.67467317	0.956771339	0.904662886	1972.732244
168852	2012	5.345162364	11	6888	25.62894343	27.87617077	1.073589751	0.799859628	2426.74095
168852	2013	5.194252037	5	7045	26.23099326	28.05685648	1.061837284	0.945401774	2289.352028
168852	2014	4.017468684	5	7202	26.03160573	28.15513314	1.140657234	0.844759317	2507.809735
168852	2015	5.839071592	6	7358	26.58765528	28.31467417	1.387653768	0.902650207	2405.468412
168852	2016	5.758731166	8	7512	27.20424394	28.7633428	1.58220034	1.218696942	2356.395064
168882	2010	5.023484922	11	15049	26.02105397	27.77535043	1.200098859	0.840076138	3721.749047
168882	2011	6.002169679	13	15391	25.40277605	27.61689971	1.002914084	0.96091053	4014.201728
168882	2012	5.312283373	22	15734	25.29800589	27.22243176	1.190844347	0.765140573	4086.582118
168882	2013	5.316801753	17	16083	25.76196585	27.72405881	1.115685137	0.872612414	4386.684101
168882	2014	4.668456789	10	16434	25.494228	27.69593137	1.147305325	0.841822175	4550.01057
168882	2015	6.667259592	17	16785	26.28294716	27.81606165	1.379388827	0.934912945	4924.45027
168882	2016	6.811079501	17	17133	26.85205516	28.38516566	1.652774589	1.148940147	4584.012585
168902	2010	5.196011965	56	50913	26.57645725	27.10157145	1.406840632	1.124459536	5001.776249
168902	2011	6.27093299	51	51938	25.64218703	27.04921235	1.135888254	1.266078581	4732.749907
168902	2012	6.277332103	67	53023	25.78446995	27.01305894	1.397817623	1.02723831	5175.148156
168902	2013	6.646569857	72	54119	26.06287668	27.41047243	1.360762148	1.121089689	5150.685707
168902	2014	5.782561834	65	55222	25.9907592	26.95687959	1.289181045	1.160885657	4921.218887
168902	2015	7.815565606	53	56269	27.12259747	27.12338949	1.586392922	1.282660325	4954.683952
168902	2016	7.76763493	77	57413	27.15548243	28.2331242	1.593882349	1.334235224	4966.502805
168932	2010	5.747071274	5	1009	26.63988567	27.22948557	1.354246173	1.143050691	2948.413017
168932	2011	6.595294072	5	1045	25.75919071	27.12457167	1.104978554	1.176295396	3632.504822
168932	2012	6.39291771	5	1080	25.83636755	26.99410745	1.284546652	1.057948208	4037.134176
168932	2013	6.707740706	5	1117	26.18020089	27.47525801	1.314577527	1.059330571	3977.554716
168932	2014	5.418288959	5	1152	26.15768952	27.30873764	1.224334393	1.156771976	4114.979725
168932	2015	7.296977712	5	1191	27.02079385	27.38577645	1.468748232	1.209437747	3737.227462
168932	2016	7.189135602	6	1233	27.36287365	28.15403584	1.670635162	1.346580505	3262.750941
169002	2010	5.020019131	6	4178	26.32878121	27.87805572	1.220781075	0.915427978	2165.630166
169002	2011	5.82980841	6	4238	25.65341941	27.46595098	0.961157836	0.927125577	2189.530368
169002	2012	5.089375262	9	4304	25.5460412	27.29674829	1.092332827	0.650727442	2291.826061
169002	2013	5.014521551	5	4369	26.07315067	27.62950071	1.059513522	0.845639634	2541.528871
169002	2014	4.112771078	6	4432	25.8634493	27.76609214	1.08802305	0.744067738	2597.220583
169002	2015	5.981034466	6	4500	26.46855008	27.79318608	1.314997027	0.856381589	2385.727041
169002	2016	6.017184497	8	4563	27.11295554	28.19827389	1.53737595	1.013105469	2367.878886
169022	2010	4.200215299	5	3542	26.89536748	28.04679728	1.016642243	0.654791662	1711.283779
169022	2011	4.139455336	6	3577	26.27664933	27.53481128	0.986859502	0.86913532	2008.31003
169022	2012	4.289827112	5	3609	26.08009522	27.92127206	0.903545265	0.696325649	1873.165338
169022	2013	4.463856586	5	3646	26.64160913	27.79230983	0.884778901	0.830159975	1833.058705
169022	2014	2.974795307	7	3681	26.40004363	27.78236377	1.055083206	0.51738687	1870.618665
169022	2015	5.689016994	5	3718	27.29400828	28.1927022	1.536303276	0.67302095	1883.056115
169022	2016	6.211673703	6	3751	27.47082363	28.69501956	1.110864383	0.951192472	1941.857209
169042	2010	4.789466011	5	2198	26.46883083	27.76522353	1.172674672	0.880180348	2613.189275
169042	2011	5.410917339	5	2250	25.86212544	27.40364709	0.92246829	0.84549369	2673.555708
169042	2012	4.862384586	6	2304	25.7076693	27.13831589	1.085196538	0.640885629	2940.253931
169042	2013	4.947722961	5	2357	26.22609732	27.59098416	1.018898072	0.756117514	3395.412713
169042	2014	4.099904333	6	2409	25.99241168	27.63886893	1.062676146	0.699447466	3910.670189
169042	2015	5.878720447	8	2463	26.58683264	27.8191022	1.302492828	0.840886626	3340.621722
169042	2016	6.040013515	6	2507	27.24571109	28.07409457	1.519082861	1.025505092	2919.823685
169102	2010	5.448804114	7	2311	26.32508137	26.47747892	1.449853053	1.079878198	2383.949103
169102	2011	6.459106198	7	2354	25.412747	26.49539344	1.17118488	1.426503496	2618.479568
169102	2012	6.381867378	8	2404	25.72429437	26.37598169	1.44956192	1.146350172	2626.738587
169102	2013	6.284830713	6	2448	25.8381374	26.63862511	1.525034245	1.07748317	2728.641942
169102	2014	4.882812035	6	2495	25.92837461	26.11597754	1.387396258	1.17646696	2783.732746
169102	2015	6.726643872	7	2544	27.04839679	26.28704166	1.801701103	1.374458693	2812.984627
169102	2016	6.472692112	5	2587	26.90896815	27.52525853	1.716606343	1.381241107	2911.210819
169132	2010	5.709321895	7	1360	26.50520108	28.48741014	1.245921105	0.635514201	2070.916216
169132	2011	6.423093818	6	1377	25.82863954	28.16197216	0.994022524	0.905030994	2128.669483
169132	2012	5.105234816	6	1392	25.66107576	27.66871769	1.168753103	0.813794734	2216.209401
169132	2013	4.997506838	5	1411	26.17544791	28.25395662	1.071868371	0.852712782	2310.342443
169132	2014	4.075648161	5	1427	25.94260339	28.30798047	1.134374067	0.697706504	2310.783839
169132	2015	6.322186872	5	1445	26.60968228	28.50003531	1.315871306	0.846670346	2924.000331
169132	2016	6.592993193	5	1459	27.20180812	28.67584441	1.553315599	1.212307975	3035.277845
169142	2010	7.343492381	6	6010	26.95451929	28.893698	1.378572128	0.963322078	5183.384159
169142	2011	8.985637901	7	6260	26.12824428	28.61266845	1.029595169	1.362600982	5674.57816
169142	2012	7.946761389	6	6508	26.19951528	28.43712967	1.368412011	1.08931362	6675.602326
169142	2013	8.519048406	5	6759	26.4772762	28.83181514	1.222195563	1.145555365	7451.404612
169142	2014	7.664511434	5	7006	26.19801466	28.50206494	1.209343606	1.213111236	9238.537742
169142	2015	10.00708388	6	7288	27.35459136	28.80328722	1.641137198	1.310693651	8293.558829
169142	2016	10.97138932	6	7549	27.56870004	29.49391413	1.65610472	1.410143781	7748.442086
169147	2010	4.654087857	5	1836	26.40080912	26.57219264	1.277031196	1.086660232	1565.811437
169147	2011	5.549891701	6	1914	25.62402601	26.53198868	1.101911881	1.023084696	1770.70666
169147	2012	5.696913573	5	1991	25.72247567	26.65363183	1.209183744	0.976120534	1715.950993
169147	2013	5.831709263	5	2068	26.17405061	27.25943045	1.336506027	0.928083313	1917.458155
169147	2014	4.406337838	5	2145	26.09907948	27.13663876	1.161762442	1.052849949	1909.558691
169147	2015	6.070415555	5	2225	27.0061859	27.27326246	1.477427411	1.126407354	1818.890476
169147	2016	5.997514782	6	2302	27.26554007	27.70340116	1.647128695	1.322063539	1747.407336
169152	2010	5.319429281	5	1687	26.27824214	26.99534578	1.256313867	1.031197789	3262.463063
169152	2011	6.413021356	7	1719	25.51408575	27.01169277	1.055395915	1.045083504	3217.543445
169152	2012	6.125814901	5	1753	25.49373738	26.77999033	1.234014093	0.982603936	3424.941191
169152	2013	6.296256399	5	1787	25.87922397	27.44390358	1.184851209	0.932616291	3819.017797
169152	2014	5.265096762	5	1823	25.78233108	27.12396673	1.068745211	0.97915413	3887.52282
169152	2015	7.406734577	5	1859	26.60976297	27.3658809	1.476706456	1.140423279	4073.770514
169152	2016	7.780453862	6	1900	27.0483786	28.00804125	1.637184963	1.306226938	3919.957905
169167	2010	3.407307375	5	1001	25.4477862	24.92260717	1.294948011	1.169012726	5778.779648
169167	2011	4.180394863	5	1031	24.56087439	25.12471977	1.181440058	1.142484207	9842.222948
169167	2012	4.703227167	5	1060	25.09037916	25.31447225	1.611338499	1.055274369	8764.718392
169167	2013	4.268239416	5	1091	25.15843991	25.90487162	1.610611598	1.088222443	11407.23145
169167	2014	3.33309411	6	1126	25.2011919	25.5705922	1.295822447	1.186445936	2172.519665
169167	2015	4.829330149	6	1153	26.65931859	25.39884019	1.940755243	1.311183097	2365.246015
169167	2016	4.264008742	5	1183	26.22398951	26.20474128	1.698237107	1.426160983	2477.367907
169192	2010	4.546838916	5	2097	25.97719711	26.70352035	1.185870962	1.036730864	1504.520634
169192	2011	5.419945129	5	2133	25.21155365	26.72814601	0.89526962	0.989362926	1536.353016
169192	2012	5.525560212	5	2174	25.11421004	26.54736772	1.097896959	0.849671404	1617.057876
169192	2013	5.480274662	5	2216	25.71613295	27.08649551	1.131598307	0.965857158	1709.268675
169192	2014	4.124929067	5	2255	25.69514313	27.01217849	1.073953186	1.082786571	1740.765478
169192	2015	5.628742348	5	2296	26.37653797	27.19329625	1.438207386	1.083658426	1831.498335
169192	2016	5.502913888	5	2335	26.80081963	27.84791336	1.486388533	1.365157307	1826.766827
169197	2010	4.720121794	5	1572	26.35427832	28.41506812	1.098677645	0.733361607	2412.295789
169197	2011	4.83838922	6	1621	25.71928145	27.95339457	0.976746758	0.900763618	2492.597915
169197	2012	4.51116864	6	1668	25.50898396	27.93296375	0.967119704	0.94568584	2449.347622
169197	2013	4.578798378	5	1717	26.17381042	27.74885493	0.994344352	0.909380086	3335.018689
169197	2014	3.090921464	5	1764	25.91050497	28.05695795	1.060543117	0.673311523	2496.004454
169197	2015	5.785415327	6	1815	26.67411261	28.2450443	1.482536723	0.864330847	2479.634007
169197	2016	6.15347383	6	1867	26.90611284	28.56162179	1.224334517	1.065025952	2436.814887
169202	2010	6.151313908	6	2699	26.48424771	27.72564492	1.192204262	0.993177729	2446.953835
169202	2011	7.158492393	6	2774	25.72778159	27.74574246	0.94108819	0.999135396	2688.398261
169202	2012	6.137533119	5	2850	25.73839209	27.03946639	1.197858234	0.811622734	2721.430317
169202	2013	6.736499881	6	2929	26.06290377	27.73801398	1.010437173	1.01325785	3345.022687
169202	2014	5.70064966	5	3005	25.71086416	27.66414341	1.060259212	0.795650746	3361.270019
169202	2015	7.802336132	6	3082	26.58846489	27.90413026	1.372900412	1.1351851	3776.453911
169202	2016	9.195661436	6	3174	27.13270351	28.14167689	1.49527973	1.327266399	4165.466967
169222	2010	3.544265162	5	1161	24.88489971	24.95455056	1.122007098	1.069006891	6924.000676
169222	2011	4.223160544	5	1205	24.17991603	24.8401104	0.957782824	1.000972151	10242.98647
169222	2012	4.684248974	5	1252	24.31578284	25.14768074	1.110245436	0.974699271	9542.76375
169222	2013	4.549295751	5	1296	24.78596367	25.89691075	1.147702804	0.990526221	13460.51622
169222	2014	3.387657918	5	1342	24.89849644	25.5769347	0.998688217	1.007920029	16646.84279
169222	2015	4.577067728	5	1388	25.62893142	25.62769924	1.521649479	1.138640095	9214.93522
169222	2016	4.425973395	5	1437	25.70128992	26.22978812	1.349650338	1.256659669	4538.255053
169232	2010	4.468426601	5	1817	26.88116817	28.53221402	1.072881516	0.674298959	1671.875882
169232	2011	4.472247585	6	1857	26.22105133	27.99790948	1.021978055	0.868620207	1716.38315
169232	2012	4.520905402	5	1899	26.02799076	28.19017132	0.936596184	0.863805343	1797.792237
169232	2013	4.69056387	7	1939	26.62079581	28.00714776	0.932833619	0.899759239	1946.081212
169232	2014	3.103891261	7	1982	26.38451008	28.22404863	1.112131647	0.598726653	1931.720857
169232	2015	5.997145148	6	2024	27.2842797	28.42018211	1.591281243	0.749908924	1896.349672
169232	2016	6.537659441	5	2074	27.40355513	28.87569837	1.161052991	0.974444454	1930.489135
169272	2010	5.449357478	15	12721	26.45287427	27.46116528	1.290104879	1.01875949	6192.246836
169272	2011	6.659400293	10	12649	25.65707014	27.49122185	1.083480921	1.031532734	6114.446321
169272	2012	6.42993283	21	12579	25.64850339	27.30753627	1.278496522	0.917415604	6733.846057
169272	2013	6.520792493	17	12527	25.98439801	27.8889683	1.174921402	0.95014393	5368.511756
169272	2014	5.460852449	15	12469	25.90152704	27.64615481	1.12087839	0.933651213	4847.58354
169272	2015	7.776137975	12	12413	26.76392854	27.86597379	1.503925267	1.117301128	5759.381444
169272	2016	8.231603564	17	12366	27.23453057	28.45635778	1.684635993	1.305933914	6900.954231
169282	2010	5.770316646	8	8210	26.17157856	28.01340291	1.272207143	0.946472522	2693.31151
169282	2011	6.942447659	14	8336	25.42140965	27.92318761	1.056192849	1.111089666	2679.276275
169282	2012	6.408208845	7	8466	25.41911579	27.60879165	1.302058627	0.851370113	2622.736475
169282	2013	6.403893336	14	8597	25.72474752	28.14464634	1.137991403	0.972744931	2900.815465
169282	2014	5.326394013	12	8732	25.58156484	27.9750656	1.140152419	0.865348578	3124.537011
169282	2015	7.735653949	14	8870	26.39105112	28.12474284	1.446244626	1.100636113	3438.283168
169282	2016	8.269440717	6	9012	26.98301137	28.75608248	1.697057004	1.260431063	3388.837351
169312	2010	5.290836938	7	4014	26.02409922	27.00285241	1.39438716	1.063190433	2516.024191
169312	2011	6.506014844	5	4173	25.12671913	27.00556554	1.154781006	1.102202243	2885.505499
169312	2012	6.608651879	5	4328	25.25758748	27.03770537	1.312967117	1.07846627	2906.933446
169312	2013	6.778378619	6	4489	25.55818272	27.44791689	1.357470091	1.134762077	2929.842434
169312	2014	5.459883192	5	4651	25.67884209	27.28777031	1.286319232	1.100106738	3925.928582
169312	2015	7.858893295	6	4816	26.56616029	27.39701473	1.672413039	1.249110066	3543.981899
169312	2016	7.943576082	5	4960	26.9084196	28.16885436	1.877915773	1.561710264	3494.711325
169322	2010	5.24739784	6	1378	26.11857227	27.28141741	1.281907367	1.018677099	2307.497349
169322	2011	6.497153216	5	1402	25.29781405	27.30826168	1.026802551	1.077039531	2598.639905
169322	2012	6.239560736	5	1426	25.26987394	26.85968996	1.250999484	0.909984482	2683.864162
169322	2013	6.536490882	5	1455	25.6007748	27.40974232	1.043228307	0.950358123	2927.160977
169322	2014	5.459401455	9	1481	25.43332819	27.36660373	1.095202351	0.867882999	3085.959697
169322	2015	7.192057978	5	1507	26.18370511	27.59962935	1.388958509	1.049978943	3028.066876
169322	2016	8.172098469	5	1540	26.78748915	27.94198418	1.610920948	1.306451695	3583.266555
169332	2010	4.355052828	6	3386	26.00713417	27.59722789	1.06422021	0.68975688	2409.188323
169332	2011	4.65823682	6	3497	25.42797748	27.38553336	0.948172978	0.826688766	3252.70116
169332	2012	4.494285058	6	3610	25.21142313	27.21300855	0.961645584	0.846346673	2018.074435
169332	2013	4.493203273	7	3725	25.87788201	27.31687628	0.960340422	0.903457447	2384.352224
169332	2014	3.278202049	7	3841	25.59918317	27.53773269	1.040893042	0.623242942	2084.559663
169332	2015	5.496840485	6	3953	26.28856522	27.71331521	1.386280493	0.728312358	2050.514919
169332	2016	5.581244111	7	4065	26.57910888	27.91349737	1.267118793	0.984287639	2135.726278
169347	2010	4.102271148	5	1846	26.34026921	27.84930198	1.070226826	0.646546276	2435.254956
169347	2011	4.295617871	5	1891	25.81685637	27.68718467	0.825366257	0.7541877	2495.048337
169347	2012	4.214096745	5	1936	25.52308021	27.05444985	0.995367976	0.699775202	2484.057498
169347	2013	4.169009841	6	1982	26.10061004	27.52647136	0.934564658	0.75770772	2453.389974
169347	2014	3.240967797	6	2027	25.84974612	27.6289734	0.957529089	0.611540397	2529.08963
169347	2015	5.114977433	5	2073	26.3895648	27.82899828	1.26912174	0.743197247	2500.733286
169347	2016	5.267441594	7	2119	26.89568632	27.83568567	1.338774844	0.976756806	2465.933692
169372	2010	5.231997424	9	5537	26.32329096	26.60131416	1.381472839	1.114334538	2291.745388
169372	2011	5.944411669	13	5632	25.43516289	26.40559591	1.104712764	1.167056603	2591.230297
169372	2012	5.818676984	11	5731	25.64719043	26.61235605	1.335462701	0.999098302	2501.826209
169372	2013	6.031552309	5	5834	25.95303289	26.99382901	1.424912524	1.044180755	3175.877203
169372	2014	4.74033916	8	5935	26.03792846	26.80800097	1.288239739	1.124418236	2894.612197
169372	2015	6.471111245	7	6042	26.93016506	26.81867863	1.678495273	1.222402428	2951.091041
169372	2016	6.080937786	6	6130	27.10192308	27.74075766	1.588668327	1.296394834	2773.85348
169382	2010	4.740360293	6	2746	26.35427832	28.41506812	1.098677645	0.733361607	1691.491179
169382	2011	4.928038331	5	2744	25.71928145	27.95339457	0.976746758	0.900763618	1765.245721
169382	2012	4.581321823	5	2740	25.50898396	27.93296375	0.967119704	0.94568584	1972.000333
169382	2013	4.617137054	7	2737	26.17381042	27.74885493	0.994344352	0.909380086	2196.074322
169382	2014	3.176014676	6	2735	25.91050497	28.05695795	1.060543117	0.673311523	2263.567617
169382	2015	5.805638418	6	2735	26.67411261	28.2450443	1.482536723	0.864330847	2316.556928
169382	2016	6.110999123	6	2721	26.90611284	28.56162179	1.224334517	1.065025952	2275.644533
169440	2010	4.520219739	8	6487	26.14831413	27.26616058	1.105974104	0.928330511	4250.683953
169440	2011	4.827572043	8	6614	25.57963544	27.08972583	0.818724296	0.841012913	4742.644943
169440	2012	4.277777229	8	6742	25.39751343	26.74389924	1.016000245	0.674449129	4983.586506
169440	2013	4.363383896	6	6874	25.93278737	27.26665602	0.953706637	0.724153798	4993.277136
169440	2014	3.566709827	8	6999	25.7179228	27.29197309	0.982374205	0.750095216	4724.690494
169440	2015	5.445201546	6	7134	26.30421939	27.59405601	1.30945619	0.842166866	4958.755427
169440	2016	5.674571637	8	7269	26.82128609	27.57388643	1.352895164	1.104072783	4617.889445
169452	2010	5.204472691	8	2404	26.14745505	27.27811333	1.280323051	1.050134838	1887.345531
169452	2011	6.28943243	6	2469	25.27740056	27.26769885	1.012803552	1.001451114	1886.687443
169452	2012	6.048119519	7	2537	25.32388017	26.94937446	1.215218982	0.915550172	1991.006212
169452	2013	6.37419732	7	2604	25.62531198	27.39491344	1.065212406	0.977418393	1965.192783
169452	2014	5.271647075	7	2671	25.51503929	27.35575067	1.107573482	0.865990088	2332.394585
169452	2015	7.137613162	5	2741	26.30046117	27.57684912	1.432969195	1.112786497	2222.099155
169452	2016	7.997119801	5	2816	26.8121947	27.81849757	1.631923566	1.359529494	2481.838661
169462	2010	4.609135645	6	2155	26.40080912	26.57219264	1.277031196	1.086660232	1758.657862
169462	2011	5.521926809	5	2240	25.62402601	26.53198868	1.101911881	1.023084696	2101.198508
169462	2012	5.639479719	5	2332	25.72247567	26.65363183	1.209183744	0.976120534	2066.526001
169462	2013	5.773273319	7	2419	26.17405061	27.25943045	1.336506027	0.928083313	2115.351778
169462	2014	4.358726917	5	2510	26.09907948	27.13663876	1.161762442	1.052849949	2242.743563
169462	2015	6.005327913	5	2599	27.0061859	27.27326246	1.477427411	1.126407354	2185.361455
169462	2016	5.97682176	5	2675	27.26554007	27.70340116	1.647128695	1.322063539	2074.041041
169467	2010	3.240328942	7	1493	24.79886644	24.20310948	1.255590631	1.159983263	2024.01494
169467	2011	4.00430185	5	1514	23.95028092	24.39062303	1.122541739	1.138773147	2110.165884
169467	2012	4.40637961	7	1536	24.47671057	24.49944554	1.593114971	1.094514755	2186.58658
169467	2013	3.938286565	6	1558	24.45471662	25.01028769	1.557947146	1.108902576	2324.969284
169467	2014	3.277564819	6	1579	24.54819472	24.72430814	1.281526666	1.224299354	2253.36758
169467	2015	4.698189321	5	1602	25.83051607	24.60796927	1.787914733	1.359850096	2304.142414
169467	2016	4.180086725	5	1621	25.40675923	25.40365822	1.539196476	1.478474319	2331.201345
169477	2010	3.565372139	5	1361	24.31801534	23.7894512	1.083698591	1.144171494	6800.286819
169477	2011	4.344554868	5	1396	23.48723023	23.98117407	0.933525941	1.187390514	5883.389077
169477	2012	5.074074385	6	1432	23.82970016	24.2104804	1.25509124	1.102795496	5701.611261
169477	2013	4.814856149	5	1475	24.09907984	24.80259517	1.207764494	1.143987369	2609.704072
169477	2014	3.543856618	6	1513	24.17533816	24.56867134	1.0883792	1.154645404	2517.078486
169477	2015	4.892403985	6	1550	25.11391729	24.51347412	1.502629993	1.304761341	2247.966849
169477	2016	4.556613792	6	1590	25.16580724	25.25133174	1.477398825	1.497579644	2253.933579
169502	2010	5.118558699	5	647	26.18587113	27.39015329	1.291719997	1.060329973	3377.321108
169502	2011	6.172931564	5	656	25.30370707	27.41973084	1.02179572	1.097973678	3418.553854
169502	2012	6.01709811	5	664	25.38106361	27.03681284	1.219360222	0.95422921	3705.767089
169502	2013	6.376172836	5	673	25.69304127	27.51810449	1.137610664	1.017564995	4150.853983
169502	2014	5.288443155	6	681	25.56017773	27.45878252	1.126249489	0.93874521	4073.951657
169502	2015	7.055149794	6	691	26.34962386	27.63858278	1.399510251	1.148672542	3759.783569
169502	2016	7.838395213	5	704	26.83113582	27.97708844	1.606117424	1.38243623	3463.715754
169522	2010	4.572263298	5	2862	26.33486442	27.49219166	1.160443312	0.915764565	2068.514851
169522	2011	5.03155645	6	2975	25.75977351	27.25966672	0.846121366	0.817092442	2549.891103
169522	2012	4.473545596	6	3086	25.59109412	26.992067	1.05203036	0.651894574	2527.314069
169522	2013	4.490358866	6	3201	26.1093455	27.43895197	0.976175138	0.696118599	2896.145717
169522	2014	3.718168967	6	3319	25.87899078	27.44072376	1.013920744	0.73344955	3073.002562
169522	2015	5.554558252	8	3433	26.51725244	27.74336393	1.349075871	0.884995425	2973.298678
169522	2016	5.682500095	5	3553	27.06259265	27.79973548	1.41643783	1.093031403	2791.32931
169527	2010	4.805205804	8	4872	25.94368505	25.35448363	1.462571905	1.22169758	2542.579184
169527	2011	5.684841078	8	4928	25.02982628	25.56582388	1.214256274	1.381390955	2618.41539
169527	2012	5.311848769	5	4987	25.41881381	25.42924078	1.55903982	1.296322262	2720.068603
169527	2013	5.3588799	7	5045	25.51273662	25.82427041	1.613959729	1.063837776	2927.301695
169527	2014	5.197241139	9	5105	25.64179235	25.30669365	1.426336174	1.291422094	2976.869296
169527	2015	6.715168915	7	5168	26.98207915	25.43427908	2.003045167	1.502915486	3062.610341
169527	2016	6.255600533	6	5238	26.45621355	26.74732579	1.717870638	1.489153047	3015.761963
169562	2010	5.042854923	24	29037	26.37295364	27.68217105	1.309416267	1.044202929	3990.991235
169562	2011	6.364735962	30	29736	25.49214133	27.68141604	1.095180351	1.061653864	4165.946996
169562	2012	6.415055466	20	30425	25.54120419	27.51171713	1.306106081	0.934351816	4634.323393
169562	2013	6.686516829	19	31127	25.87304233	28.04045896	1.13353442	1.03621519	4595.519841
169562	2014	5.620776893	30	31833	25.79785282	27.81377379	1.171917952	0.875217239	4567.425626
169562	2015	7.273626786	30	32547	26.68070525	28.14927499	1.536891767	1.162993239	4635.105754
169562	2016	8.048543472	33	33243	27.1309259	28.71645445	1.758439231	1.392135599	5077.327059
169572	2010	4.877792431	9	6102	26.57307704	26.22151938	1.391114166	1.107733352	5997.465633
169572	2011	5.565996052	7	6198	25.69333483	25.78147139	1.194975761	1.17411031	5618.988598
169572	2012	5.27750051	6	6293	26.0316959	26.30204352	1.408036421	1.123179152	8088.430733
169572	2013	5.277176516	6	6397	26.16973556	26.69986855	1.517530151	0.970739785	6280.048229
169572	2014	4.23991394	11	6498	26.28395832	26.09766938	1.333939645	1.161041813	4002.776867
169572	2015	5.828802578	14	6599	27.85713514	26.39904363	1.999031177	1.213224412	4140.847561
169572	2016	5.519784581	6	6683	27.28398236	27.37942306	1.713807992	1.177040848	3792.604472
169582	2010	4.682765755	5	2769	26.19715051	27.54931935	1.11502203	0.678722589	2522.046267
169582	2011	5.0484414	9	2834	25.62809574	27.30967887	0.835855397	0.751978885	2382.18309
169582	2012	4.380001739	6	2899	25.360327	26.82313556	1.018475202	0.680765786	2573.700922
169582	2013	4.329227746	7	2963	25.93023128	27.34206743	0.940489121	0.716805968	2641.269175
169582	2014	3.432929564	5	3029	25.67737682	27.27179407	1.00201225	0.616078449	2579.13157
169582	2015	5.161917726	6	3095	26.22552672	27.60936209	1.223493846	0.764233298	2586.508543
169582	2016	5.285963246	5	3156	26.78234768	27.71809646	1.35808875	1.004142655	2596.135345
169602	2010	5.673328841	10	7363	26.45630023	27.94455458	1.231347362	0.995112819	4728.876022
169602	2011	6.644607001	15	7557	25.78921906	27.81701543	1.033769063	1.092194553	8032.665438
169602	2012	5.941255316	18	7752	25.67676715	27.41294084	1.193604837	0.846753389	8028.268978
169602	2013	5.980126867	12	7949	26.16333521	28.01258611	1.170256091	0.943473723	8767.835904
169602	2014	4.826502987	7	8144	25.97158126	28.04111674	1.081211165	1.053058098	13351.49314
169602	2015	6.93093932	10	8343	26.69644667	28.004669	1.407503888	0.983784505	10270.52641
169602	2016	7.269090941	10	8562	27.27299035	28.67547958	1.597330127	1.195510577	9623.853936
169612	2010	5.675355779	7	6644	26.8354097	27.09497148	1.429786784	1.072861027	12631.88717
169612	2011	6.390486192	7	6815	25.88725134	26.93794342	1.120925048	1.23033171	12362.66524
169612	2012	6.090779483	8	6984	26.11695413	26.99979513	1.409826202	1.041430113	13182.97758
169612	2013	6.431061652	9	7162	26.36258054	27.5558869	1.450905182	1.041909326	12029.33472
169612	2014	5.158622542	7	7339	26.40674379	27.15835196	1.342540398	1.159960238	8515.553136
169612	2015	6.861215494	6	7518	27.50784423	27.1614667	1.630417966	1.208249371	10785.73325
169612	2016	6.623452174	8	7708	27.45771006	28.22673713	1.594732129	1.255764759	9230.621919
169617	2010	5.602308553	6	3122	26.43361445	28.63514053	1.23677074	0.651224799	2164.703214
169617	2011	6.541413512	6	3196	25.72112621	28.27363871	0.985469587	0.966424763	2269.230327
169617	2012	5.511304885	7	3270	25.5503298	27.80443233	1.180096539	0.894655264	2335.813308
169617	2013	5.361706648	5	3344	26.04025768	28.36403564	1.076798873	0.893822497	2407.961555
169617	2014	4.364192687	5	3419	25.85545847	28.37882223	1.133885544	0.714525065	2599.382148
169617	2015	6.756100163	9	3496	26.51579814	28.54419842	1.320240104	0.887618829	2952.343284
169617	2016	7.192903147	7	3574	27.16228785	28.78531021	1.614926403	1.269411333	2789.97961
169622	2010	5.454056494	6	5682	25.85951514	27.97832872	1.229307417	0.758459593	2380.42482
169622	2011	6.554944634	8	5705	25.15580493	27.7182735	0.982598494	1.002105385	2655.381749
169622	2012	5.65999368	6	5723	25.03938325	27.32344635	1.194668928	0.855781664	2666.981119
169622	2013	5.578800206	9	5750	25.49631001	27.8381425	1.105029009	0.930310636	2915.817553
169622	2014	4.636966911	9	5780	25.3028713	27.78983656	1.16325849	0.818452063	2897.947673
169622	2015	7.025987389	9	5805	25.96211709	27.91457319	1.320803042	0.92651214	2896.763489
169622	2016	7.571212717	8	5832	26.60772609	28.40378096	1.646468417	1.217809084	3240.779554
169652	2010	5.238043058	6	2728	25.52218014	26.20614813	1.436613112	1.082337713	1882.872522
169652	2011	6.171780702	5	2759	24.6262261	26.27922896	1.165712225	1.195926532	2006.425539
169652	2012	6.286510537	5	2785	24.86857016	26.28945875	1.326593203	1.133035633	2071.452529
169652	2013	6.281470818	6	2819	25.18530146	26.77438261	1.428240482	1.182815451	2193.59873
169652	2014	5.10194789	5	2850	25.29375095	26.65304694	1.298794567	1.11281994	2254.002326
169652	2015	6.917179226	5	2885	26.18315228	26.57673137	1.72941767	1.286601912	2187.342112
169652	2016	6.660836431	5	2901	26.34594007	27.42317788	1.722505874	1.475589101	2213.295814
169672	2010	4.452373721	5	1844	26.13776054	27.59300844	1.033058315	0.657162156	2441.566316
169672	2011	4.6750127	5	1886	25.61815228	27.43386954	0.809549077	0.756875615	2725.542567
169672	2012	4.26545879	5	1925	25.37301789	26.96621228	0.961079599	0.710887186	2728.047917
169672	2013	4.314777085	5	1966	26.006565	27.36820208	0.940627392	0.815742847	2954.36122
169672	2014	3.342511348	5	2008	25.72212856	27.48045975	0.948926061	0.568357496	3240.516481
169672	2015	5.258756516	5	2051	26.32880047	27.67131052	1.29807724	0.703519009	3504.076497
169672	2016	5.371414565	5	2086	26.76032064	27.67435022	1.304030289	1.020468069	3356.124167
169702	2010	6.528401703	7	4173	26.83768922	27.85362986	1.241064296	1.00084045	2712.693514
169702	2011	7.768387558	6	4289	26.07980513	27.89523956	0.964647677	1.044471005	2750.262652
169702	2012	6.841940832	6	4406	26.07344282	27.40463706	1.231232672	0.82059513	2983.590765
169702	2013	7.560393246	5	4528	26.34935136	27.99458592	1.040003697	0.932803701	2926.389635
169702	2014	6.454861152	6	4647	26.10236381	27.80422201	1.074615801	0.863576639	3351.748841
169702	2015	8.974077546	7	4771	27.09613654	28.09335247	1.495501134	1.075341348	3535.526451
169702	2016	10.60379393	6	4888	27.47741527	28.41813554	1.547844683	1.327811378	4190.453994
169732	2010	3.689916824	11	2809	24.91349886	24.41998733	1.152385994	1.186535982	1533.100613
169732	2011	4.442835535	6	2848	24.04535032	24.55051617	1.017019691	1.212776051	1595.501523
169732	2012	5.298235179	7	2888	24.45751415	24.79236194	1.365152105	1.089567882	1798.071776
169732	2013	5.019419414	5	2928	24.66901961	25.40822446	1.336525378	1.166329863	1941.341104
169732	2014	3.606253332	6	2970	24.74186826	25.10067947	1.171641722	1.199552742	1886.641693
169732	2015	5.121908302	5	3015	25.90268491	25.01693372	1.718005093	1.340205338	1987.012497
169732	2016	4.733932159	8	3054	25.79776833	25.74060654	1.571903682	1.485202064	2044.82509
169742	2010	4.585351709	10	4311	25.81693517	26.42376264	1.180027549	1.053884867	1814.999738
169742	2011	5.506683097	9	4425	25.02591825	26.37415938	1.035760012	1.155866977	1909.595967
169742	2012	5.769796806	9	4536	25.2237415	26.43684943	1.178830369	0.974940194	1975.994142
169742	2013	5.701338547	5	4650	25.68293403	26.99965433	1.284684569	1.060441741	2020.711194
169742	2014	4.383022473	7	4765	25.65738589	27.01075339	1.114061926	1.112244208	2093.370123
169742	2015	6.143918258	5	4886	26.54047131	26.92588225	1.588426748	1.209156137	2010.159879
169742	2016	5.796612902	7	4989	26.86773419	27.52200928	1.635423806	1.297462596	1998.951811
169752	2010	4.50728118	7	1613	25.49693249	25.54050347	1.260864851	1.130858975	1787.455581
169752	2011	5.303985293	5	1668	24.60092906	25.55021577	1.078283498	1.201977518	1808.498577
169752	2012	5.789999814	6	1726	24.88338731	25.67993186	1.253588816	1.070046767	1934.115892
169752	2013	5.684198548	5	1785	25.2106502	26.2612595	1.318661105	1.031904522	1975.285381
169752	2014	4.291370442	5	1844	25.30962819	26.14639996	1.158397204	1.129859894	1994.349869
169752	2015	5.795041044	5	1903	26.0830047	26.01555824	1.51478643	1.253698224	2004.12798
169752	2016	5.4666552	5	1960	26.34648652	26.72049387	1.564150069	1.497086958	2005.869801
169772	2010	5.66697464	34	30768	26.67824438	27.83159761	1.357863252	1.131706316	3482.032452
169772	2011	7.035009315	32	31319	25.75158951	27.80108602	1.138017929	1.123621586	4126.113061
169772	2012	6.883777031	36	31880	25.81237324	27.70394588	1.339497203	1.003603941	4818.235088
169772	2013	7.009564273	35	32451	26.10035544	28.25764062	1.231740505	1.078823238	4672.393491
169772	2014	5.795664172	37	33012	26.17391977	28.12749371	1.235343615	1.058780934	5287.363946
169772	2015	8.256068764	28	33596	27.03663934	28.38932518	1.609175428	1.346488525	5918.236419
169772	2016	8.502326018	43	34148	27.47076371	28.90678995	1.849224128	1.467522494	6015.536279
169782	2010	4.09371331	5	4066	26.92056531	28.01615939	1.02162181	0.671650852	1435.56848
169782	2011	3.912409763	8	4171	26.26441806	27.47281206	0.909171993	0.862463853	1566.87535
169782	2012	3.994298886	6	4281	26.04413567	27.74998887	0.905038399	0.63157913	1686.441648
169782	2013	4.144611498	8	4388	26.60492666	27.57672968	0.855285622	0.688776729	1708.088208
169782	2014	2.885733915	7	4498	26.41144017	27.64560175	0.985611819	0.465165651	1655.346907
169782	2015	5.441348306	5	4608	27.17606231	27.98194501	1.470041481	0.565408742	1616.470043
169782	2016	5.891340546	7	4731	27.45843765	28.79453831	1.077358521	0.805502898	1589.320831
169792	2010	4.845142162	5	2267	25.98251934	27.7472064	1.212165351	0.818902383	3386.531526
169792	2011	5.619014976	6	2299	25.38011976	27.41904003	0.968575878	0.881588248	4061.877012
169792	2012	5.010005495	5	2337	25.2519521	27.10590947	1.169399844	0.675084642	4099.424302
169792	2013	5.084823436	6	2368	25.75318254	27.62466214	1.086308812	0.812231251	5003.755406
169792	2014	4.332945427	6	2404	25.465101	27.58289727	1.13378218	0.72189094	2732.690898
169792	2015	6.30039964	7	2441	26.18063429	27.8062684	1.34133551	0.884401079	2743.924675
169792	2016	6.516493245	6	2468	26.78536857	28.22078401	1.633068569	1.07320976	2786.252949
169797	2010	5.034818865	5	1405	26.14745505	27.27811333	1.280323051	1.050134838	6006.452089
169797	2011	6.132628008	5	1438	25.27740056	27.26769885	1.012803552	1.001451114	3826.414843
169797	2012	5.988341547	5	1468	25.32388017	26.94937446	1.215218982	0.915550172	3448.259165
169797	2013	6.278225941	7	1500	25.62531198	27.39491344	1.065212406	0.977418393	3950.985098
169797	2014	5.214296278	5	1529	25.51503929	27.35575067	1.107573482	0.865990088	4700.55302
169797	2015	7.014599383	6	1563	26.30046117	27.57684912	1.432969195	1.112786497	3855.878026
169797	2016	7.776154239	5	1598	26.8121947	27.81849757	1.631923566	1.359529494	4245.768975
169802	2010	4.411269183	6	2022	25.69307816	26.91718349	1.264371698	1.066998046	1733.754585
169802	2011	5.158342568	5	2086	24.89943875	26.62833056	0.962335985	0.964142934	1957.880939
169802	2012	4.827726151	5	2148	24.80247145	26.6930175	1.031385147	0.757314543	1967.35888
169802	2013	4.796051951	7	2217	25.41597638	27.07774282	1.039089427	0.890756464	1984.148001
169802	2014	3.988524345	6	2280	25.36224717	27.26527528	1.142458777	0.872136009	1975.94961
169802	2015	5.570387995	5	2346	25.85534344	27.29579418	1.355874787	0.994271639	2072.227954
169802	2016	5.414505019	7	2407	26.4377251	27.56306291	1.504068766	1.22316254	2062.371196
169807	2010	4.423778267	5	2462	26.36408465	27.92759232	1.044619942	0.658589904	1787.284499
169807	2011	4.593940231	6	2536	25.81445506	27.72075618	0.858682136	0.768286092	1958.831936
169807	2012	4.276653454	5	2613	25.5602945	27.34438464	0.977598091	0.74300686	1981.023075
169807	2013	4.315113786	5	2685	26.22165109	27.67492161	0.958647964	0.861519522	2138.088137
169807	2014	3.238796166	6	2764	25.93877176	27.68382184	0.983758254	0.585368622	2065.921681
169807	2015	5.36063268	6	2839	26.61043304	27.82499207	1.35921024	0.72850246	2069.718972
169807	2016	5.595967382	7	2910	26.96315649	27.94391552	1.254147969	1.004479251	2001.797963
169817	2010	3.964724597	5	943	24.61833823	25.0797605	1.241877039	1.125133513	2150.123941
169817	2011	4.802679617	5	988	23.77960828	25.27080585	1.007696057	1.155796115	1919.73021
169817	2012	5.494751321	5	1033	24.03858455	25.36000499	1.232080981	1.078477217	1977.170419
169817	2013	5.281384303	5	1079	24.36784462	25.84180578	1.243471312	1.027110062	2099.390723
169817	2014	4.027670343	5	1125	24.56014555	25.78045716	1.141498621	1.084150827	2137.233713
169817	2015	5.453601428	5	1170	25.20653728	25.59362181	1.462905214	1.251673507	1903.278599
169817	2016	5.109455521	5	1218	25.57631756	26.28838878	1.715400651	1.498641302	1846.491469
169822	2010	5.524067642	5	1626	26.24538591	27.56468025	1.185944992	1.014077714	3132.842221
169822	2011	6.551982567	7	1661	25.58683381	27.53982483	1.036465091	1.032606247	2617.627755
169822	2012	5.902467692	5	1702	25.53837816	27.07055218	1.232887425	0.801181373	2675.599774
169822	2013	5.857262919	5	1736	25.91136576	27.77805362	1.148707184	0.864498144	2607.28581
169822	2014	4.8693553	5	1777	25.71810142	27.58553757	1.106796325	0.898680548	3696.236589
169822	2015	7.144500937	5	1813	26.53552311	27.68880181	1.423881441	1.017033214	3014.467564
169822	2016	7.57625508	5	1849	27.021305	28.37973113	1.596789527	1.141379428	2724.908754
169827	2010	5.084062828	6	3754	26.17175585	26.67295602	1.14373759	1.163183135	1582.067311
169827	2011	6.050062152	7	3831	25.46552231	26.61372482	0.949022024	1.161236522	1711.82945
169827	2012	6.02407356	6	3912	25.42149181	26.32431361	1.140607769	1.01130807	1778.296474
169827	2013	5.989410261	7	3991	25.92712262	27.00171779	1.14766156	1.036759868	1869.272709
169827	2014	4.537230434	6	4073	25.77632892	26.99379545	0.992638756	1.269708262	1882.002416
169827	2015	6.307875607	5	4159	26.63252673	27.11386403	1.433029884	1.173164813	1851.424058
169827	2016	6.164854972	7	4236	26.96473855	27.86521342	1.463758078	1.411697023	1891.655794
169832	2010	4.493995913	6	2037	27.0649291	28.74909732	1.026436795	0.85649384	1532.81755
169832	2011	4.213007283	6	2124	26.40086835	27.99952979	0.914174148	0.933782633	1581.665394
169832	2012	4.184895606	5	2213	26.20702563	28.53332843	0.953319315	0.7467118	1644.10119
169832	2013	4.346186159	6	2302	26.80011709	28.10022545	0.934477809	0.805414328	1683.558999
169832	2014	2.912994223	5	2389	26.54620868	28.21642549	0.970332776	0.51420631	1619.046343
169832	2015	5.62516002	7	2479	27.35766597	28.38672329	1.547440098	0.737130998	1599.091521
169832	2016	6.03964913	6	2584	27.5686085	29.14681518	1.052658637	0.930600362	1624.059598
169836	2010	6.243850322	5	2213	26.93194056	27.36346623	1.48872448	1.201244518	3064.110918
169836	2011	7.324693664	5	2234	26.02816663	27.35546754	1.113288742	1.431503393	3326.864333
169836	2012	6.882040779	5	2256	26.19202316	27.28498171	1.415270282	1.145670929	3449.601505
169836	2013	7.49460079	6	2281	26.35279443	27.39021674	1.371145346	1.122476088	3629.142486
169836	2014	6.625959578	5	2307	26.30612359	26.92577145	1.277196364	1.163482676	3750.248751
169836	2015	8.985260879	5	2263	27.43124677	27.15645947	1.678391413	1.419245567	3952.754853
169836	2016	9.259259529	6	2281	27.40282153	28.33577006	1.675253779	1.412655237	4097.8848
169840	2010	5.343599501	5	1760	26.31718139	28.1432573	1.265558702	0.959437502	2122.414924
169840	2011	6.424978085	5	1819	25.62220884	27.82345364	0.989977206	0.983258651	2163.573403
169840	2012	5.647605641	5	1877	25.51134718	27.65163676	1.118435715	0.729234999	2267.611349
169840	2013	5.5740979	5	1940	26.04589798	28.04547285	1.105220019	0.91369716	2697.816911
169840	2014	4.550229761	6	2001	25.8337075	28.16947908	1.131262223	0.884319737	2794.947395
169840	2015	6.437462725	5	2062	26.49428603	28.14936336	1.350915127	0.911944784	3142.47735
169840	2016	6.552176825	5	2120	27.13967547	28.59906454	1.600537267	1.124176859	2765.85449
169841	2010	5.954364872	5	1348	26.52629234	27.67912906	1.325762129	1.027629915	3354.091321
169841	2011	7.074035074	9	1372	25.65759282	27.6908143	1.065285296	1.186016373	3360.093799
169841	2012	6.50804117	5	1386	25.71311981	27.38494506	1.277088805	0.946327714	3642.156764
169841	2013	6.964767196	5	1410	26.03610742	27.86044435	1.212272683	1.032371182	3766.811467
169841	2014	5.692911989	5	1429	25.8752186	27.6263956	1.152145083	1.008534113	4504.169222
169841	2015	7.651914877	5	1450	26.8021737	27.9203131	1.463615417	1.186955676	4492.329846
169841	2016	8.771699966	5	1483	27.16195619	28.35177202	1.618644028	1.30434325	4426.141039
169842	2010	5.661526438	8	2653	26.57388758	27.19589941	1.366430122	1.12697619	2888.537526
169842	2011	6.506759443	5	2712	25.69722045	26.9720187	1.096643468	1.162472844	3518.096393
169842	2012	6.247146973	8	2776	25.84173384	27.03903046	1.299330643	1.000180294	3912.816856
169842	2013	6.57026597	5	2830	26.17328872	27.41002029	1.371847803	1.074431033	4171.794886
169842	2014	5.281554452	8	2897	26.27896716	27.3369773	1.311938467	1.11496253	4797.311228
169842	2015	7.011605901	7	2959	27.06975277	27.3617815	1.602811502	1.210647306	5134.988924
169842	2016	6.730894166	5	3021	27.36554163	28.09115034	1.611484911	1.295366379	3746.774598
169852	2010	4.785376533	6	1474	26.17468861	26.34008738	1.318450809	1.114251034	2034.510026
169852	2011	5.714755691	6	1515	25.41165873	26.4086908	1.150160584	0.998393365	2059.433407
169852	2012	5.800135571	5	1551	25.563653	26.51048525	1.272283168	1.022821792	2134.373693
169852	2013	6.031700173	6	1591	25.93805025	27.1122651	1.360615539	0.918412169	2167.380907
169852	2014	4.834151501	6	1630	25.81179587	26.79631596	1.140052806	0.92462247	2074.680675
169852	2015	6.83109572	7	1670	26.89914069	27.03409117	1.573578549	1.210222801	2009.368515
169852	2016	7.055067512	7	1711	27.11359095	27.6087721	1.739156369	1.32137818	2051.521919
169952	2010	4.370529602	5	1465	26.00713417	27.59722789	1.06422021	0.68975688	1850.836692
169952	2011	4.624008941	7	1493	25.42797748	27.38553336	0.948172978	0.826688766	1805.668924
169952	2012	4.447252278	5	1525	25.21142313	27.21300855	0.961645584	0.846346673	1809.823481
169952	2013	4.459636415	5	1553	25.87788201	27.31687628	0.960340422	0.903457447	2323.687188
169952	2014	3.20198319	6	1587	25.59918317	27.53773269	1.040893042	0.623242942	2451.238986
169952	2015	5.479690746	6	1618	26.28856522	27.71331521	1.386280493	0.728312358	2365.518046
169952	2016	5.62674873	5	1641	26.57910888	27.91349737	1.267118793	0.984287639	2560.99146
169962	2010	4.727978556	6	2589	26.67229312	28.84335935	1.084399394	0.810871001	1530.543719
169962	2011	4.689645465	5	2659	26.02855303	28.29285464	0.975665392	0.947312034	1563.698553
169962	2012	4.497809071	6	2733	25.78064089	28.37287905	0.963211584	0.970920123	1823.208136
169962	2013	4.633764657	6	2807	26.43042402	28.15963381	0.977185482	0.923288081	1823.635819
169962	2014	3.083250998	5	2875	26.22161604	28.41572394	1.036632847	0.631060128	1877.7234
169962	2015	5.834616279	5	2950	26.97826219	28.59294297	1.470498285	0.963729309	1933.914706
169962	2016	6.31494964	5	3037	27.17602002	28.76276045	1.168498489	1.157415674	1931.599073
169967	2010	4.01059193	5	756	25.72586501	25.92206472	1.217122598	1.098386377	2393.022656
169967	2011	4.87506614	5	777	24.90623174	26.01555395	0.934111836	0.993632893	2430.774364
169967	2012	5.087481904	6	802	24.90655907	25.97860859	1.066911389	0.944424178	2392.642738
169967	2013	5.019778069	5	822	25.50040688	26.740636	1.159288969	0.905288079	2412.792869
169967	2014	3.754097036	5	844	25.54026682	26.40694536	1.06238627	1.005204992	2263.773481
169967	2015	5.260865171	5	870	26.26112837	26.88969781	1.49706419	1.187863405	2178.765261
169967	2016	5.27010868	5	895	26.58084454	27.32949225	1.564728069	1.400472492	2379.931111
169972	2010	4.051922383	7	5921	26.86516826	27.89790305	1.016047741	0.70178183	1356.06525
169972	2011	3.927286682	7	6103	26.21914492	27.31782919	0.950447119	0.879061292	1405.701793
169972	2012	4.120879812	7	6289	26.03002121	27.67408849	0.899135016	0.648993774	1449.838253
169972	2013	4.282325659	5	6478	26.5952279	27.46567256	0.850082002	0.795907186	1604.04298
169972	2014	2.878968038	6	6661	26.36776487	27.53833764	1.016867796	0.526413449	1598.021327
169972	2015	5.486078446	6	6851	27.22523636	27.97990548	1.508919812	0.586624753	1580.5934
169972	2016	5.978475411	5	7042	27.54760784	28.8597982	1.146612385	0.796218555	1709.347024
169977	2010	5.29897242	5	1700	26.64778919	26.59122431	1.462401718	1.055417958	3382.711738
169977	2011	6.083810414	6	1740	25.76632703	26.29265274	1.183000871	1.275213912	2079.036779
169977	2012	5.960376943	5	1783	26.09326471	26.65718014	1.497256915	1.058114535	2149.5712
169977	2013	6.070018799	5	1823	26.23038507	26.89689429	1.551120301	0.977001789	2219.748801
169977	2014	4.735964954	5	1863	26.38359167	26.50429803	1.372914713	1.143244419	2150.443276
169977	2015	6.601939646	7	1905	27.85780018	26.6900134	1.989113719	1.23715987	2127.962874
169977	2016	6.33676139	6	1943	27.4249218	28.04984813	1.771763118	1.179925838	2190.615473
170001	2010	5.595321155	9	2716	26.62082213	27.04965378	1.396736943	1.093071673	2593.782387
170001	2011	6.378381361	5	2734	25.71465958	26.80369295	1.107256836	1.174477358	2500.897259
170001	2012	5.996959599	6	2751	25.90615241	26.9289101	1.372127619	1.02155149	2645.323773
170001	2013	6.234551385	5	2771	26.17574473	27.32105049	1.434122796	1.043051154	3265.941851
170001	2014	5.037774807	6	2789	26.2477499	27.00901461	1.307144579	1.130850607	4302.570219
170001	2015	6.825455423	6	2814	27.19336622	27.12173559	1.628718107	1.167247956	4768.589887
170001	2016	6.56270007	8	2813	27.32156243	28.10749035	1.60217745	1.317004398	3463.697152
170017	2010	5.732471217	5	3147	26.47443884	27.30421955	1.395414988	1.109290782	2876.869753
170017	2011	6.710898906	11	3222	25.57249959	27.19338607	1.131551038	1.180957718	4232.960189
170017	2012	6.519470196	6	3298	25.72035261	27.15138744	1.296118407	1.022922875	4381.55656
170017	2013	6.711851016	7	3377	26.05240312	27.54427374	1.377896992	1.110095691	3853.754263
170017	2014	5.398685022	9	3453	26.18485328	27.51619815	1.333406792	1.148508815	4835.22929
170017	2015	7.344687886	7	3536	27.00129653	27.52463824	1.665473007	1.262991584	4897.44724
170017	2016	7.084561889	6	3595	27.32675346	28.19279864	1.7299499	1.391531261	4426.841726
170032	2010	4.07914194	7	5458	26.57975277	27.91551261	1.014156684	0.667749621	1488.513606
170032	2011	3.987739182	7	5532	25.94218928	27.42838435	0.936513944	0.837068015	1637.861726
170032	2012	4.113079203	5	5607	25.72378515	27.62778002	0.904563982	0.699174275	1705.594215
170032	2013	4.247568555	5	5689	26.31080637	27.45549482	0.884388711	0.796530325	1822.971318
170032	2014	2.876961171	9	5768	26.09049416	27.61103434	0.985831419	0.521872485	1796.083891
170032	2015	5.304559674	7	5846	26.83462784	27.91092422	1.420398177	0.675313538	1813.16658
170032	2016	5.669774775	5	5893	27.07405752	28.22174834	1.079875007	0.92329989	1956.629505
170037	2010	4.993553638	5	1093	26.88000593	27.15078059	1.427997406	1.078085867	3718.296306
170037	2011	5.893820045	6	1116	25.92397056	27.05139724	1.147472442	1.250583061	4471.32494
170037	2012	5.931794018	5	1142	26.13254766	27.05973514	1.413736305	1.060724761	5423.007836
170037	2013	6.340007477	6	1166	26.38473339	27.56537027	1.435554098	1.069746081	5214.373572
170037	2014	5.55409553	5	1187	26.36906117	27.11753461	1.354491587	1.153923074	6032.091639
170037	2015	7.412932928	6	1213	27.53151702	27.18490089	1.633079807	1.234587121	6476.570323
170037	2016	7.178136044	6	1242	27.50162138	28.33055839	1.618556698	1.254881567	3942.565904
170042	2010	3.797550328	14	9395	25.68639164	25.32521445	1.25308015	1.158588876	2280.295356
170042	2011	4.591129389	16	9628	24.79496684	25.49239125	1.142605619	1.176181557	2764.918507
170042	2012	5.202623373	7	9862	25.28757751	25.71099474	1.492444926	0.993831567	2765.481221
170042	2013	4.874576671	7	10101	25.43434958	26.3849863	1.513531412	1.072071027	3161.977405
170042	2014	3.627766443	5	10338	25.48615769	26.0293948	1.295717128	1.148160899	3176.45868
170042	2015	5.150342297	9	10582	26.88359478	25.94070531	1.928321304	1.326025668	3695.25822
170042	2016	4.643030337	18	10825	26.52116359	26.60534817	1.650065567	1.355041387	2761.801255
170045	2010	4.334589983	5	1131	26.32976449	26.31427593	1.413544497	1.056996441	2000.402552
170045	2011	5.060213981	7	1158	25.45997086	26.15785892	1.216906798	1.242091392	1989.923117
170045	2012	5.497636772	5	1192	25.8254686	26.55117142	1.389241905	1.014483707	2056.545632
170045	2013	5.365035056	5	1226	26.03420763	27.01277154	1.572227136	1.026433472	2201.028112
170045	2014	3.910184646	5	1254	26.08853201	26.73434732	1.330820212	1.113590065	2213.292855
170045	2015	5.722063295	5	1288	27.16062401	26.75298856	1.789313647	1.220450225	2230.113959
170045	2016	5.152525341	5	1320	27.1194401	27.45543254	1.675955072	1.304306759	2287.891049
170049	2010	4.621515528	6	1665	26.64124955	26.84396641	1.429114993	1.064397273	4444.435556
170049	2011	5.726296378	5	1700	25.71206552	26.87098286	1.153369966	1.501116053	4093.741242
170049	2012	5.714942368	5	1735	25.9881334	26.59834726	1.416976448	1.176871781	4566.758008
170049	2013	5.693941991	5	1772	26.12234196	26.9231835	1.460544882	1.108029416	4659.807059
170049	2014	5.135417912	5	1809	26.1450673	26.446156	1.348626415	1.162725191	5393.844294
170049	2015	6.997692483	5	1844	27.42735126	26.57455956	1.836888624	1.381576634	5442.705662
170049	2016	6.759307807	6	1882	27.19804489	27.8440464	1.683942775	1.390556409	4936.026032
170052	2010	5.042714182	204	145925	26.11911238	26.63684495	1.295528747	1.067874708	5590.325358
170052	2011	6.158913662	233	151307	25.22132148	26.49247585	1.058039278	1.035865793	5463.50352
170052	2012	6.098236779	270	156665	25.27571527	26.50096145	1.258696335	1.029008232	5587.252169
170052	2013	6.30086538	249	161931	25.60088476	27.20044885	1.173031064	1.035902906	5855.108932
170052	2014	5.307194897	314	167252	25.62871452	26.95161432	1.118599189	0.932132821	6088.101165
170052	2015	7.433736803	343	172614	26.42415176	27.19067454	1.480987499	1.115459785	6100.48158
170052	2016	7.747342695	346	178153	26.81113304	27.58616716	1.627299084	1.361640083	5982.897505
170062	2010	5.358456764	5	3452	26.38517687	27.23100793	1.210439205	1.04372749	1466.895098
170062	2011	6.447288448	6	3536	25.69964834	27.2152964	1.049027333	1.045206471	1591.799637
170062	2012	5.946213572	5	3619	25.66490198	26.7597227	1.227187208	0.864147955	1738.449724
170062	2013	5.927699169	5	3705	26.04568396	27.55838865	1.163507213	0.881182996	1744.807754
170062	2014	4.873683457	6	3793	25.88230437	27.28371375	1.046170216	0.95286082	1665.412153
170062	2015	6.937396077	5	3880	26.72986899	27.46141938	1.453991773	1.071885451	1834.146705
170062	2016	7.30071316	6	3976	27.16028394	28.19078427	1.586598721	1.198941646	1708.784821
170072	2010	4.250677793	11	13604	26.66574441	28.11019911	1.082862662	0.597497777	1933.683792
170072	2011	4.426738195	17	13766	26.04006611	27.63562278	1.000141263	0.817943033	2103.354295
170072	2012	4.484009614	13	13931	25.83999742	27.72564871	0.951740235	0.748266771	2211.186004
170072	2013	4.558925719	9	14104	26.48334958	27.75593459	0.9677502	0.865019703	2369.873919
170072	2014	3.175140576	7	14276	26.20264558	27.91311701	1.071403304	0.619192361	2382.117928
170072	2015	5.664716933	11	14451	27.03406218	28.04395557	1.515780704	0.671416357	2357.775274
170072	2016	5.985384956	11	14605	27.21926991	28.37561827	1.192855069	0.872738885	2418.884334
170077	2010	5.230086192	5	984	26.43577066	28.1354232	1.20021202	0.94180099	5152.153969
170077	2011	6.294094613	5	1016	25.81178354	28.01932924	1.029635554	1.041278146	5088.55986
170077	2012	5.704825346	5	1044	25.6992212	27.60502204	1.191809721	0.799739511	8524.453314
170077	2013	5.760298971	6	1076	26.16331862	28.13258277	1.13947491	0.910653554	12054.47371
170077	2014	4.815258662	5	1110	25.91612894	28.16371618	1.122235526	0.955982242	9556.964175
170077	2015	6.730925339	5	1139	26.72399702	28.15250138	1.42810476	0.94296555	5987.357072
170077	2016	6.976545886	5	1172	27.27775889	28.77505297	1.618166477	1.169068461	5246.479867
170082	2010	4.675689523	5	1293	26.33019932	27.54947573	1.158835036	0.934029964	3141.175456
170082	2011	5.267176879	5	1354	25.77360514	27.21669811	0.90519697	0.829786075	2296.710054
170082	2012	4.707295469	5	1411	25.61184392	26.96869928	1.094900503	0.634361485	3326.474301
170082	2013	4.834270648	5	1474	26.12500912	27.4620566	1.009153638	0.712664113	2435.729881
170082	2014	4.11647938	5	1540	25.84391295	27.4421642	1.05263708	0.68416661	2652.529194
170082	2015	5.865077924	5	1599	26.53398917	27.71126765	1.344384005	0.879760619	2236.885512
170082	2016	6.093459593	5	1672	27.12067814	27.91369506	1.501554204	1.020488932	2302.574467
170160	2010	4.491986214	7	6927	26.01005966	27.36433475	1.031619107	0.73933037	2273.100592
170160	2011	4.783477436	6	7025	25.49905034	27.23124589	0.804986549	0.782992291	2626.784746
170160	2012	4.290511683	7	7122	25.26943273	26.85810219	0.939671571	0.72102029	2476.999832
170160	2013	4.304980253	11	7223	25.90122337	27.28404029	0.939802923	0.815018898	2862.428152
170160	2014	3.337311215	10	7322	25.63691448	27.38262006	0.960518452	0.608875828	2862.544085
170160	2015	5.241469011	9	7427	26.21925331	27.62872954	1.274011252	0.695669035	2693.882177
170160	2016	5.316959114	9	7558	26.6580732	27.60600447	1.347651146	1.023855811	2740.571893
170162	2010	4.425861337	9	7079	26.38744291	27.86176582	1.037588491	0.637751029	6235.017266
170162	2011	4.60496295	8	7174	25.86284191	27.7022477	0.844903348	0.728763897	6988.009915
170162	2012	4.175086701	5	7271	25.58753814	27.19611317	0.971286894	0.696134144	5924.973923
170162	2013	4.192993996	10	7369	26.21005639	27.53256946	0.936471661	0.793334645	6359.139489
170162	2014	3.297415731	9	7470	25.93615829	27.6858454	0.944422069	0.569258276	6665.356602
170162	2015	5.226424992	11	7569	26.54262422	27.80766361	1.286329697	0.708534441	6009.281437
170162	2016	5.405382866	15	7660	26.94675835	27.94443036	1.227641896	0.964886826	5242.645726
207962	2010	2.639067145	5	3050	28.49187103	28.28992084	1.401894306	0.88813629	900.5679488
207962	2011	2.359957176	5	3117	27.99015189	27.94542499	1.849740344	0.836608424	1024.944216
207962	2012	3.723549051	5	3180	28.3135877	29.1202935	1.891654186	0.916288546	1060.282789
207962	2013	4.093407505	7	3246	28.96774207	28.10665113	1.38080985	1.019095285	1169.235191
207962	2014	2.312715249	6	3313	27.94488032	28.05502637	1.472159502	0.558409475	1392.415342
207962	2015	3.678647131	8	3382	28.97330906	27.87311802	1.8484855	0.778958486	1283.845589
207962	2016	5.218822851	7	3447	28.37196577	28.2694344	1.501265305	0.787243738	1138.870196
207967	2010	1.443747764	6	6687	28.3836896	28.55724849	0.959223937	0.586060652	884.193873
207967	2011	1.268349991	7	6850	27.36229454	28.14003888	1.404413962	0.879944006	1029.445407
207967	2012	1.780461226	5	7008	28.32104191	28.65104727	1.355823706	0.662064194	1007.773757
207967	2013	1.99353195	6	7168	28.7565729	28.43942053	0.969022394	0.7121447	1150.371179
207967	2014	1.26648194	7	7329	27.81967969	28.26024398	1.01955924	0.434034914	1193.352869
207967	2015	1.615259987	7	7496	28.27345475	28.2161621	0.997391519	0.544444028	1089.844634
207967	2016	2.202877304	6	7628	27.97462952	28.47759338	1.024233561	0.448128421	1223.746304
207982	2010	2.888617411	5	12991	28.28688003	28.50155652	1.441340213	1.034074833	1008.256115
207982	2011	2.640068636	5	13218	27.86465945	28.17652167	1.799400481	0.852963704	1095.571781
207982	2012	3.967913149	6	13442	27.92644186	29.10473271	1.652327583	1.090558975	1143.657345
207982	2013	4.3889093	6	13663	28.61234958	28.75127275	1.362243993	1.050704317	1189.086834
207982	2014	2.643463376	9	13888	27.78936912	28.39473951	1.529619314	0.65087434	1633.424915
207982	2015	4.549546336	9	14117	28.88799125	28.26382314	2.037264518	0.886859487	1820.920593
207982	2016	6.154735873	6	14366	28.33450099	28.59274604	1.650916941	0.869626778	1343.135885
207995	2010	2.657821192	10	14251	27.8398444	28.11404969	1.27776324	0.914570148	1228.049465
207995	2011	2.352232259	9	14476	27.48430364	27.8417418	1.632243963	0.744483032	1278.454905
207995	2012	3.664753216	6	14702	27.45269306	28.28994353	1.447772947	1.041534804	1572.024434
207995	2013	3.946687407	12	14923	28.06706373	28.00631096	1.175448325	1.007900114	1667.934104
207995	2014	2.276381904	17	15150	27.39498349	27.95245442	1.331277661	0.61746971	1892.405865
207995	2015	4.168245701	14	15382	28.49502685	28.06279761	1.851797147	0.791212112	1729.536098
207995	2016	5.478825415	12	15658	28.15624001	28.28455454	1.564744309	0.820243327	1687.921304
208002	2010	4.347749147	7	6060	25.73805393	25.63410022	1.297927608	1.085183132	3791.118018
208002	2011	5.036326857	5	6179	24.97339196	25.63866093	1.049576643	1.00520128	4120.173706
208002	2012	5.001845121	7	6295	24.99392412	25.99706267	1.137071922	1.055898324	5421.504969
208002	2013	4.917311103	9	6413	25.60053053	26.43997997	1.202957102	0.936595316	5946.486946
208002	2014	4.223253897	7	6532	25.67573746	26.18901269	1.169634132	1.039060384	6410.465959
208002	2015	5.375597474	7	6654	26.54255452	26.74619675	1.669613435	1.118044795	6385.188076
208002	2016	5.306037377	11	6759	26.56170792	27.09236966	1.466057289	1.413177309	3485.769818
208012	2010	3.46480119	9	19989	25.70378479	26.32464203	1.030079466	0.68556382	1063.387976
208012	2011	3.389985311	14	20354	25.13517756	25.70115991	0.973987643	0.779002577	1077.744965
208012	2012	3.831868314	14	20711	24.95627309	26.06817461	0.942484971	0.696383925	1215.789455
208012	2013	4.013278942	8	21066	25.62246875	26.30144908	0.91120363	0.821402497	1285.564568
208012	2014	2.651568444	12	21436	25.20787555	26.09599074	1.095459806	0.523967532	1378.803856
208012	2015	4.696365116	15	21813	26.07873925	26.47708546	1.528516395	0.59673559	1404.474561
208012	2016	5.115888576	16	22229	26.24337856	26.70177303	1.100661967	0.80873055	1449.375705
208032	2010	2.036863759	9	7814	28.43702426	28.16047401	1.280007825	0.922723165	1630.402563
208032	2011	1.787167963	9	8005	27.74786239	27.91340723	1.870810344	1.082339695	1982.805226
208032	2012	2.598519037	10	8190	28.34339513	29.11503671	1.821474833	0.79808099	1497.697528
208032	2013	2.883020824	7	8378	29.08734959	27.8190754	1.3255926	0.967413792	1883.086513
208032	2014	1.80615393	7	8564	28.08990627	28.01057522	1.537014905	0.686612746	2081.518278
208032	2015	2.428335918	9	8757	28.72400081	27.83872834	1.510414743	0.759348311	1558.963548
208032	2016	3.374595187	8	8958	28.17291062	28.24900938	1.278457999	0.704601963	1760.507491
208047	2010	3.290893412	6	16394	26.13169649	26.67811918	1.151624258	0.731855154	1026.823147
208047	2011	3.106625154	13	16669	25.54489647	26.22886682	1.098423711	0.749714905	1168.789792
208047	2012	3.53437069	10	16849	25.38291575	26.28697734	1.064701786	0.814659513	1280.47642
208047	2013	3.770860937	5	17136	25.99811825	26.31339961	0.987267811	0.900478712	1313.921824
208047	2014	2.517419869	13	17416	25.53393494	26.49757464	1.150889058	0.561293693	1367.162775
208047	2015	4.209934808	13	17701	26.45274594	26.58285048	1.63395006	0.604055435	1268.526411
208047	2016	4.636584427	7	17981	26.63167883	26.85535688	1.257711955	0.867219863	1435.514922
208052	2010	1.933235055	11	17163	28.37791901	28.15671007	1.079545977	0.877917445	1223.22185
208052	2011	1.651387392	12	17456	27.77284036	27.64515587	1.427051761	0.739845806	1458.622146
208052	2012	2.417592889	17	17744	27.97319043	28.16763856	1.470012551	1.047850692	1434.538341
208052	2013	2.565612854	15	18033	28.56273296	27.6792746	1.009913607	0.684159118	1522.741929
208052	2014	1.643927433	12	18325	27.8328367	27.90304578	1.245174835	0.656562401	1677.491918
208052	2015	2.522555166	9	18626	28.58818092	27.92416238	1.364114381	0.708713161	1558.765707
208052	2016	3.327310841	15	18879	28.26891809	28.43603455	1.123054883	0.704715545	1657.78764
208072	2010	2.623071774	33	61471	27.84114947	27.98867139	1.261229566	0.917587303	1889.053238
208072	2011	2.332127623	41	62198	27.42545124	27.68944587	1.453321364	0.74984285	1882.88929
208072	2012	3.699023332	28	62929	27.44919571	28.17391865	1.424160607	1.071796569	2060.965668
208072	2013	3.964013521	49	63679	28.03099396	27.89487667	1.132109572	0.985244344	2253.250077
208072	2014	2.307809366	33	64433	27.44772468	27.89944263	1.341916929	0.644126063	2543.259888
208072	2015	4.150194768	50	65204	28.4907228	28.04984652	1.860256259	0.789947332	2232.211521
208072	2016	5.370389216	46	66016	28.20597575	28.29414801	1.505526381	0.865805099	2265.204507
208092	2010	3.794702259	27	48394	25.52370609	26.55216114	1.309121782	0.992398231	5357.539128
208092	2011	4.347443296	29	49496	24.83679176	26.38815922	1.055214717	0.948475118	5260.847828
208092	2012	4.541421486	29	50550	24.73234072	26.70486735	1.098668655	0.789205043	6622.849735
208092	2013	4.436246621	28	51565	25.32425693	27.051434	1.096520544	0.881419104	7384.842454
208092	2014	3.448409053	35	52605	25.389676	26.99878419	1.293006368	0.86124606	7875.585361
208092	2015	4.764662842	21	53670	26.02033761	27.27241087	1.596055586	0.97846241	6416.134435
208092	2016	4.567515103	28	54978	26.27933879	27.59307657	1.458239526	1.187823815	5276.704476
208112	2010	3.845688988	38	47842	26.76114982	27.26755707	1.268483773	0.772050931	1165.318465
208112	2011	3.780740781	33	48781	26.25893068	26.80238821	1.200644818	0.771891364	1333.411442
208112	2012	4.3799312	45	49777	26.05634539	27.36787811	1.097788464	0.795157616	1458.952328
208112	2013	4.637383523	24	50775	26.70125854	27.45259745	0.965731551	0.961514476	1520.08653
208112	2014	2.973655078	45	51792	26.17922806	27.09926065	1.217083173	0.618257164	1652.562851
208112	2015	4.958225181	39	52838	27.24922508	27.33910731	1.829875414	0.678656133	1441.587709
208112	2016	5.601616455	38	53759	27.1521448	27.56656717	1.233582759	0.93415217	1437.406156
208122	2010	1.395173978	10	28748	28.15463479	27.32842528	0.980972001	0.658990661	1112.665733
208122	2011	1.242186146	15	29555	26.97821165	27.13669416	1.303100897	0.624662703	1245.922643
208122	2012	1.770548711	14	30692	27.78720902	27.7812306	1.309459471	0.514438716	1288.585816
208122	2013	1.941846286	24	31099	28.32366551	27.47349386	0.901769225	0.589942308	1409.703786
208122	2014	1.203215598	16	31876	27.34123701	27.33021145	0.880744313	0.439997345	1551.741293
208122	2015	1.54946053	22	32669	27.76899253	27.18524741	0.876780011	0.426299388	1450.009435
208122	2016	2.071136482	29	33501	27.50658803	27.55366713	0.904874509	0.354068506	1482.345187
208125	2010	1.684981572	6	2999	28.0684674	27.27106929	1.110311258	0.841868492	978.9949194
208125	2011	1.47589374	6	3065	27.2037369	27.2274143	1.623248706	0.893849166	1496.329465
208125	2012	1.905630716	5	3263	28.00660892	27.85192058	1.596749717	0.852595187	1159.267241
208125	2013	2.081983022	7	3334	28.55931144	27.38274607	1.095755913	0.755096647	1034.818356
208125	2014	1.477662249	6	3395	27.39974619	27.35295176	1.130641047	0.591552008	1212.89518
208125	2015	1.934386181	5	3463	27.94900235	27.35962575	1.143501789	0.614565752	1126.233864
208125	2016	2.465267759	5	3561	27.64256464	27.63800144	1.034228407	0.588350274	1185.764535
208132	2010	3.483939045	6	3385	26.58997439	27.28949615	1.299844486	0.848561831	1073.096086
208132	2011	3.617889536	5	3460	26.10455637	26.70662239	1.141910739	0.874235419	1116.129067
208132	2012	4.331825986	5	3535	25.97448974	27.68283657	1.110480452	0.667332752	1076.496046
208132	2013	4.519988041	6	3611	26.47562381	28.02769123	1.055853537	0.960112093	1214.37175
208132	2014	3.197417744	5	3687	26.53315667	27.95111953	1.318963067	0.75809016	1273.225385
208132	2015	4.684808407	5	3765	27.52746936	27.90960506	2.064344814	0.931862242	1388.818155
208132	2016	4.983265303	6	3813	27.21006401	28.5498184	1.383909978	1.039102245	1338.456373
208145	2010	2.862734347	5	3756	27.41718604	27.71957564	1.351212637	0.856283681	1358.684355
208145	2011	2.692231437	7	3826	27.02052287	27.60733793	1.396544541	0.716563632	1487.187059
208145	2012	3.775824728	5	3901	26.92637603	27.7907857	1.308621053	1.011842436	1496.784183
208145	2013	4.052896962	5	3974	27.46309019	27.87289085	1.085524718	1.020762044	1649.734593
208145	2014	2.691457394	5	3763	26.83799813	27.54012123	1.2135095	0.625752172	1921.464453
208145	2015	4.498425598	7	3833	27.98767385	27.61554708	1.834812592	0.788608865	1731.923678
208145	2016	5.498454701	6	3896	27.84022011	27.90203632	1.504571175	0.955065238	1734.14596
208167	2010	2.985419558	8	2908	27.05359617	27.33795937	1.194600608	0.78793955	1140.443183
208167	2011	2.677693485	6	2838	26.43305599	26.8330909	1.175328386	0.721144143	2410.695494
208167	2012	3.331003752	11	2781	26.39946402	26.88277545	1.306082522	1.03130016	2133.97791
208167	2013	3.555503831	6	2737	27.01747714	26.68262731	1.042084537	0.777337633	2506.531816
208167	2014	2.535012636	6	2684	26.52388207	26.9538926	1.220958735	0.638233212	2531.025725
208167	2015	4.488277031	6	5413	27.33422801	27.15513549	1.545961635	0.707188493	1273.578098
208167	2016	5.018358535	7	6356	27.33092933	27.19148767	1.25746442	0.841446115	1236.30906
208182	2010	3.140973078	11	12924	27.00465938	28.15264372	1.380287252	0.827952629	952.2097434
208182	2011	3.055823296	16	13202	26.30623512	27.20937056	1.21571872	0.896891347	1003.558454
208182	2012	3.809873079	15	13472	26.22170122	28.04324003	1.168741427	0.81126831	1043.679285
208182	2013	4.050298906	15	13748	26.77988351	28.31420005	1.140058111	1.096464865	1097.312725
208182	2014	2.427290246	10	14029	26.50585648	27.87035688	1.338272	0.674447097	1280.879088
208182	2015	4.072657052	16	14320	27.55365252	27.86685751	1.980365604	0.76058668	1253.955881
208182	2016	5.25572447	15	14530	27.26084625	28.14517312	1.415938675	0.868485694	1345.903495
208187	2010	3.865615944	5	8277	26.04796644	27.36735441	1.073676229	0.588783537	947.0617389
208187	2011	3.825124244	5	8433	25.36762089	26.47997467	0.945677607	0.823053111	985.1511212
208187	2012	4.136500116	5	8580	25.21163187	26.7260426	0.92523382	0.734062902	954.7056472
208187	2013	4.280404904	5	8736	25.85692958	26.90994922	0.877653992	0.779504703	1114.975423
208187	2014	2.781462245	5	8890	25.58107671	26.68933368	1.107685317	0.498630438	1139.257382
208187	2015	5.112855569	5	9047	26.45388598	27.21307451	1.502500798	0.584428066	1133.392106
208187	2016	5.488547654	6	9203	26.66354146	27.58399045	1.141849308	0.806887148	1254.037054
208189	2010	1.614358275	9	4197	28.33710654	27.4044931	1.185891849	0.904099507	930.7281006
208189	2011	1.373528328	7	4310	27.58489381	27.26897892	1.800328316	0.886866982	1022.575475
208189	2012	1.824135934	6	4424	28.13864062	27.95116075	1.665236964	1.023140771	1053.059061
208189	2013	1.985102823	6	4536	28.57037413	27.45718919	1.131838872	0.824332971	1120.132472
208189	2014	1.420827731	6	4650	27.64487091	27.53004233	1.282911215	0.643736015	1291.799647
208189	2015	1.898120425	6	4767	28.29194391	27.40637737	1.31130819	0.682971462	1285.421572
208189	2016	2.410915089	7	4877	27.95950835	27.73834844	1.116498219	0.707848546	1313.002221
208207	2010	4.186612943	9	7715	26.70143447	27.96803836	1.036571344	0.587057875	1332.98166
208207	2011	4.297632759	8	7871	26.0483109	27.52732423	1.011762436	0.862685436	1321.521063
208207	2012	4.394366885	7	8027	25.88548158	27.56639644	0.946026441	0.743946117	1373.71787
208207	2013	4.527081483	9	8183	26.54514735	27.71664236	0.956198384	0.818751707	1475.744767
208207	2014	3.182731495	5	8340	26.28502185	27.77654544	1.078613547	0.592447316	1763.545234
208207	2015	5.619551495	10	8499	27.07780556	27.96052356	1.51591679	0.633798812	2148.835085
208207	2016	5.970574963	7	8647	27.31256646	28.28576317	1.196443095	0.856567432	2177.885297
208222	2010	2.001009775	6	11429	28.37463795	27.8914164	1.187229425	0.981047369	955.0901374
208222	2011	1.698991291	12	11689	27.83600687	27.58671398	1.886054812	0.931344636	1086.69192
208222	2012	2.690246506	13	11946	28.16411581	28.45808025	1.669401691	1.146938663	1078.638255
208222	2013	2.923391824	10	12197	28.66986277	27.62346489	1.158507619	0.885151813	1036.301105
208222	2014	1.800384187	8	12460	27.88831936	27.82866631	1.494247952	0.733335981	1156.246007
208222	2015	2.721950761	14	12725	28.73544054	27.72573928	1.487735365	0.791118096	1155.404151
208222	2016	3.695210867	10	13020	28.17955743	28.25623488	1.260369252	0.773061588	1164.18173
208227	2010	2.710993122	7	6475	27.39662421	27.57819404	1.306361049	0.875247766	1442.194008
208227	2011	2.535543296	9	6563	26.96226077	27.57446641	1.478986377	0.672256132	1526.618425
208227	2012	3.465621076	8	6648	26.9033863	27.7279971	1.342083176	0.961053565	1491.420358
208227	2013	3.769645551	7	6731	27.43254225	27.97167968	1.143748658	0.915306154	1530.28597
208227	2014	2.528633883	5	6819	26.74853016	27.35803484	1.18459844	0.557262808	1826.826146
208227	2015	3.94354903	10	6910	27.90969156	27.39463885	1.785270152	0.71582964	1740.239739
208227	2016	4.830786202	9	6979	27.65995439	27.56291826	1.480901783	0.883072883	2154.710961
208232	2010	4.587644156	5	14422	26.48922979	28.14552122	1.155427503	0.939401837	1871.634008
208232	2011	5.068605143	12	14607	25.91021919	27.71039744	0.928499598	0.967544377	1808.285624
208232	2012	4.734203895	10	14796	25.69588994	27.59057062	1.026528218	0.777688424	2239.657458
208232	2013	4.664728911	7	14995	26.4338765	28.12821422	1.029579756	0.810725099	2507.480359
208232	2014	3.598200675	14	15193	26.22728115	28.05178761	1.155610628	0.839006356	2661.660702
208232	2015	5.780642535	11	15396	26.77923794	28.28964981	1.392377912	0.782685296	2692.814286
208232	2016	5.783868927	10	15605	27.25019772	28.48135801	1.526756303	1.09044176	2106.103143
208252	2010	2.815504828	92	94434	28.09293033	28.40563047	1.465848264	0.973068403	2054.48926
208252	2011	2.674712543	76	95825	27.60875378	27.90111605	1.734515086	0.840193752	2029.156116
208252	2012	3.852287026	73	97392	27.6937414	29.30213888	1.608566794	0.962727784	2205.899674
208252	2013	4.208351551	69	98858	28.33172136	28.63392087	1.301253276	1.004597547	2165.866887
208252	2014	2.671888587	81	100244	27.47193258	28.24044526	1.420891078	0.642240335	2170.588471
208252	2015	4.583212709	98	101659	28.77851265	28.22608871	2.146994346	0.850499072	2029.564021
208252	2016	6.062501084	103	103081	28.2192374	28.53842004	1.752209894	0.873007264	2130.941352
208272	2010	2.394035914	23	41691	28.57799465	28.18790862	1.325918671	0.955105063	1405.371001
208272	2011	2.072766649	32	42431	28.01187232	27.86646931	1.974804129	0.974518801	1517.076367
208272	2012	3.387229634	28	43162	28.43630129	29.06615518	1.930618497	0.98575445	1516.169238
208272	2013	3.708795569	31	43889	29.19441263	27.81531354	1.376581677	0.993970436	1582.351581
208272	2014	2.073440222	45	44626	28.13883973	27.93725942	1.563672375	0.624228797	1784.545743
208272	2015	3.175946233	33	45385	29.03483626	27.78835828	1.69761507	0.780528838	1606.036185
208272	2016	4.524058108	36	46171	28.39236485	28.27708046	1.364526767	0.796178992	1732.07077
208277	2010	3.80883935	7	7932	25.94532906	27.27181576	1.015430619	0.828951891	1567.92663
208277	2011	3.593577141	8	8062	25.27368788	26.74029604	0.913914622	0.807958339	1577.878909
208277	2012	3.649628314	9	8192	25.08064759	26.70648864	0.928530072	0.726057964	1827.871731
208277	2013	3.773431501	5	8316	25.69350622	26.65743961	0.900274417	0.755357678	1810.58554
208277	2014	2.555159478	7	8444	25.39574811	26.76207932	0.987682109	0.472568394	2196.316484
208277	2015	4.701011775	8	8577	26.09330688	26.91802729	1.399109371	0.660421309	2034.617956
208277	2016	4.973572036	6	8724	26.46975629	27.46526923	1.082017461	0.892622513	1917.324905
208282	2010	2.589925526	32	69212	27.57884706	27.53855931	1.290107864	0.855949876	1564.635639
208282	2011	2.374553372	46	70080	27.20984502	27.36769273	1.66594296	0.671816326	1590.804882
208282	2012	3.436944158	45	70951	27.25836965	27.80952761	1.52308625	0.947796906	1760.237153
208282	2013	3.73024211	68	71865	27.88411971	28.26643022	1.259445672	0.88837477	1692.867225
208282	2014	2.333646395	46	72765	27.01699537	27.31871453	1.24611068	0.542877576	1807.722521
208282	2015	3.739965677	57	73695	28.19217801	27.35825732	1.807449297	0.669216736	1649.756769
208282	2016	4.727489561	50	74617	27.72316217	27.57271691	1.528901586	0.8181443	1758.51291
208292	2010	2.717873552	23	26524	28.63030421	28.62582929	1.454456632	0.890756307	1225.349485
208292	2011	2.453009987	24	26964	28.12114931	28.12692665	1.98987172	0.893978416	1285.246074
208292	2012	3.849820173	18	27398	28.54304554	29.50600454	1.997177116	0.884174782	1424.93438
208292	2013	4.222959086	17	27840	29.12826578	28.25049868	1.427698406	1.025384468	1386.915309
208292	2014	2.308989031	15	28284	28.10381632	28.3202828	1.552142077	0.571782631	1641.652095
208292	2015	3.827556463	19	28742	29.19309246	28.02401878	1.918899053	0.797386004	1637.189377
208292	2016	5.531253222	19	29149	28.52514713	28.42135157	1.563970197	0.819719515	1603.735548
208302	2010	3.410163558	21	22112	26.51814033	27.52376072	1.281378108	0.759230689	1236.92083
208302	2011	3.384866292	18	22566	25.83478813	26.5999476	1.150040991	0.86599108	1458.534631
208302	2012	4.078496274	14	23018	25.7270002	27.3729024	1.126889596	0.716697525	1574.136198
208302	2013	4.280430501	21	23467	26.33197336	27.66179229	1.071299225	1.003495815	1616.25677
208302	2014	2.620607943	19	23922	26.09997739	27.40131914	1.23560506	0.616141675	1759.707354
208302	2015	4.537387702	13	24391	27.16826693	27.32864136	2.01608202	0.725938109	1702.58028
208302	2016	5.534884697	18	24793	26.84362605	27.71420004	1.268464995	0.914462086	1534.532914
208307	2010	2.159611848	9	7450	28.39058189	28.21228108	1.137900836	0.869613316	1127.668044
208307	2011	1.839740838	8	7599	27.86806949	27.75653209	1.504711939	0.727441238	1247.066173
208307	2012	2.880282509	8	7745	28.03062695	28.35611501	1.503965198	1.091020768	1271.068967
208307	2013	3.070149492	6	7885	28.62188542	27.81258167	1.062105603	0.77628948	1380.637729
208307	2014	1.868484764	8	8028	27.90632837	28.00655876	1.307451365	0.62915468	1397.966299
208307	2015	3.043903341	8	8177	28.74059827	28.14869387	1.531058143	0.723972504	1365.794424
208307	2016	4.002384705	8	8371	28.38913879	28.54137678	1.232397614	0.73802763	1396.036701
208312	2010	2.439720345	15	36157	28.02129586	27.90591369	1.261699571	0.896895523	1076.172447
208312	2011	2.09737755	23	36637	27.65580814	27.63112562	1.843372222	0.788135895	1183.530244
208312	2012	3.473126072	30	37118	27.7521835	28.41344003	1.632255945	1.04862972	1184.154507
208312	2013	3.764064592	28	37608	28.47762734	27.90196094	1.264618244	0.94619063	1199.812662
208312	2014	2.115117558	35	38101	27.59274087	27.76920413	1.420344848	0.623079459	1322.130175
208312	2015	3.636340283	50	38604	28.70133565	27.79208116	1.764700849	0.733929049	1242.031472
208312	2016	4.955568847	38	39206	28.09688513	28.28022846	1.527568646	0.774450518	1295.917039
208327	2010	4.078914144	7	7224	26.34976499	27.75650674	1.0886598	0.73155568	1364.476249
208327	2011	4.034350125	6	7310	25.61667294	27.04951816	0.961835301	0.880988623	1397.533721
208327	2012	4.252167351	5	7391	25.45566896	27.21360543	0.914431804	0.764825533	1229.663996
208327	2013	4.390737964	7	7476	26.07944739	27.15827424	0.872085428	0.833145707	1333.656202
208327	2014	2.847325497	5	7562	25.82391599	27.14709914	1.083174718	0.565297411	2332.892088
208327	2015	5.359483842	6	7648	26.70916553	27.69959233	1.567958229	0.635535212	7433.659239
208327	2016	5.774123337	7	7764	26.9492669	28.03437761	1.152395898	0.966592469	11720.33349
208332	2010	2.954253343	8	13868	27.36984348	27.82219321	1.357073577	0.85702229	1707.149822
208332	2011	2.819478193	8	14036	26.87339715	27.75700889	1.341843538	0.724399291	1934.036004
208332	2012	3.63145727	6	14209	26.8379949	27.85596684	1.303483919	0.956141724	1899.101567
208332	2013	3.89309145	12	14381	27.40857383	27.97211682	1.129875864	1.012392885	1827.779179
208332	2014	2.469602522	9	14557	26.74604079	27.64070381	1.165606398	0.617123933	1964.852597
208332	2015	3.912558056	7	14737	27.88991705	27.63281341	1.82108399	0.796208775	2031.724533
208332	2016	4.849845006	9	14915	27.74193828	27.8557496	1.441646729	0.94450402	1917.114079
208342	2010	2.555820219	12	5666	28.68485816	28.57769681	1.394152662	0.873318977	890.299935
208342	2011	2.242569096	7	5789	28.13904517	28.19191117	1.983582843	0.956871431	1031.227797
208342	2012	3.73446434	10	5910	28.61484938	29.50278597	2.005642458	0.87118342	990.5751946
208342	2013	4.108676972	9	6031	29.26290949	27.99404381	1.407497463	0.989134509	1044.157853
208342	2014	2.179387352	11	6151	28.22488199	28.27838587	1.536840059	0.562813215	1310.86406
208342	2015	3.423576972	9	6277	29.2074074	28.07060919	1.772362386	0.746776624	1238.762602
208342	2016	5.112486869	13	6389	28.49274604	28.47754891	1.447198237	0.784238856	1197.545994
208352	2010	2.796023256	11	10907	26.9112942	27.30444295	1.344588946	0.772668064	1061.431423
208352	2011	2.696326884	9	10798	26.37487844	27.12678525	1.180433885	0.727409158	1262.623432
208352	2012	3.498906454	10	10877	26.38328452	27.19438904	1.246058267	0.935564808	1299.631755
208352	2013	3.760739407	14	10977	26.90240991	27.52642407	1.05384219	1.006665755	1531.29966
208352	2014	2.770925428	7	11062	26.37274456	27.18868475	1.234240166	0.602053162	1736.248739
208352	2015	4.203396807	8	11153	27.41285231	27.22204885	1.723232776	0.71273705	1587.414414
208352	2016	4.914347369	6	11194	27.30027308	27.51090664	1.36372209	0.958749632	1621.428406
208357	2010	4.288636789	12	21989	26.34212051	28.00830895	1.030560647	0.738593663	3862.340893
208357	2011	4.617246205	15	22576	25.73561639	27.5001806	0.931549721	0.907234493	3908.013879
208357	2012	4.518028398	11	23124	25.55015783	27.38117712	0.949999916	0.77668191	6416.696707
208357	2013	4.518248261	11	23641	26.28376108	27.77773355	0.943412707	0.822367777	5718.492729
208357	2014	3.421209277	14	24177	26.01521787	27.88128954	1.104943774	0.683113836	3785.49304
208357	2015	5.543483581	11	24735	26.69738723	28.1314586	1.470351862	0.641061845	3816.197443
208357	2016	5.595199661	16	25326	27.00075601	28.11537482	1.288896141	0.953275658	3426.978273
208359	2010	4.523959555	5	4435	25.74574058	27.87964727	1.116348738	0.943617446	1255.596732
208359	2011	4.917452795	6	4553	25.17890091	27.53290352	0.939544291	1.038218426	1454.077197
208359	2012	5.013204718	5	4665	24.98545632	27.45968019	0.939553433	0.805391812	1496.728829
208359	2013	4.983027729	6	4780	25.7371224	27.90550077	0.989643704	1.003556695	1505.12353
208359	2014	3.429785985	8	4897	25.51707587	27.95870493	1.155471428	0.869258165	1564.110247
208359	2015	5.755205435	8	5017	26.18953651	28.1551263	1.524463472	0.664193703	2226.134659
208359	2016	5.83381407	5	5132	26.48221133	28.30653696	1.377366732	1.184861543	1669.275596
208360	2010	4.447061583	6	4688	26.06442199	27.68918785	1.168321136	0.761467406	954.0169884
208360	2011	4.566138193	10	4810	25.49214132	26.71144316	0.991858234	0.849912647	1055.886622
208360	2012	5.043802615	7	4927	25.29021256	27.17447182	0.991076771	0.736157876	1060.244041
208360	2013	5.261934763	8	5045	26.00734574	27.62793322	0.934603836	1.075080832	1017.989541
208360	2014	3.375381621	5	5163	25.67704727	27.36161145	1.153369295	0.60020704	1138.933883
208360	2015	5.591177096	7	5285	26.60194617	27.59676502	1.737468229	0.670873241	1052.810173
208360	2016	6.147549836	6	5408	26.46579652	27.58410403	1.192068569	0.906952717	1063.615613
208361	2010	4.118846591	5	9712	26.03728146	27.70553223	1.088796878	0.711770081	1312.778464
208361	2011	4.379990775	5	9742	25.49685351	27.01239907	0.950938723	0.795061143	1369.371377
208361	2012	4.639294797	5	10040	25.27050398	26.96093537	0.934233664	0.641165161	1356.690905
208361	2013	4.70771068	10	10334	26.04013471	27.5365672	0.992912634	0.87701877	1477.389081
208361	2014	3.227835275	7	10637	25.70495829	27.43708289	1.187118202	0.625209759	1447.486229
208361	2015	5.307461037	6	10942	26.46592567	27.54596916	1.616506131	0.668381786	1362.037695
208361	2016	5.723849399	6	11240	26.53624709	27.8376454	1.215931817	0.901006133	1433.791109
208362	2010	3.877834966	6	6680	25.59288621	26.80507488	1.18778816	0.858165019	2331.34303
208362	2011	4.276259754	6	7093	25.0241408	26.43746564	0.918511499	0.869928372	2133.220266
208362	2012	4.523791272	7	7231	24.85656066	26.57218851	0.880277001	0.581972408	2577.896773
208362	2013	4.456895856	9	7366	25.53410096	27.19182073	0.997613978	0.925344017	2592.76581
208362	2014	3.234150243	7	7503	25.36785869	26.98683031	1.108703125	0.697722745	2501.045655
208362	2015	5.085604907	7	7643	26.12088904	27.28671754	1.646189911	0.758026642	2285.720731
208362	2016	5.363499448	10	7765	26.21653772	27.59170348	1.329804858	0.978612555	2140.166027
208372	2010	3.179242897	8	8598	26.86478821	27.99116252	1.351778058	0.812598448	1236.849287
208372	2011	3.078431091	7	8749	26.19700798	27.12408168	1.188158245	0.867375456	1301.226322
208372	2012	3.825752525	10	8901	26.12380538	27.77610515	1.161455049	0.780634989	1229.580964
208372	2013	4.075946927	16	9049	26.67685037	28.1016453	1.115244483	1.033048842	1494.955361
208372	2014	2.495819186	14	9208	26.41403362	27.71846944	1.312293181	0.645149478	1608.221364
208372	2015	4.109437476	10	9368	27.45753067	27.67974017	1.947801739	0.724084516	1321.264491
208372	2016	5.124510786	12	9487	27.15111563	27.92195239	1.351603433	0.847978363	1326.145782
208392	2010	2.86500692	8	10418	27.11931315	27.78870403	1.350914578	0.841843031	942.6540517
208392	2011	2.704128901	11	10559	26.59544508	27.46060006	1.331582472	0.763312181	1091.659858
208392	2012	3.41183097	9	10700	26.49442065	27.84278352	1.247001005	0.871057969	1112.05561
208392	2013	3.66613474	9	10843	27.04299864	27.92063069	1.10024994	0.983283499	1220.274083
208392	2014	2.347802371	6	10994	26.50687332	27.47276527	1.196341105	0.59397309	1347.350882
208392	2015	3.612434708	6	11136	27.65590364	27.42293459	1.859992282	0.746051449	1379.724219
208392	2016	4.464213823	6	11265	27.41325185	27.64560518	1.360066693	0.836257937	1306.811788
208402	2010	2.759978434	7	6126	27.28322409	27.74047838	1.333844101	0.842736531	920.7742551
208402	2011	2.642510942	7	6227	26.8012294	27.62596289	1.400717945	0.717333618	1066.604299
208402	2012	3.597326772	7	6327	26.73331174	27.8130882	1.298050423	0.931570193	1030.261417
208402	2013	3.867850242	11	6424	27.28422864	28.01480528	1.139774511	0.939944365	1210.692238
208402	2014	2.648697594	9	6524	26.65807581	27.45585685	1.190626653	0.568547668	1356.443178
208402	2015	4.117440196	7	6629	27.79250938	27.42019344	1.826105449	0.757844494	1369.070039
208402	2016	4.885053056	5	6722	27.60657259	27.66339169	1.447427365	0.870240117	1393.494386
208407	2010	4.596990093	8	9345	26.78205237	28.68563337	1.075524737	0.830589005	2763.85628
208407	2011	4.554327326	6	9590	26.07721409	27.98726673	1.004976968	0.956693112	2828.153967
208407	2012	4.742051345	6	9824	25.9078188	28.2796591	0.938914381	0.917073805	3294.825515
208407	2013	4.933749154	5	10045	26.52478834	28.15619894	0.913497867	0.926089888	3369.817696
208407	2014	3.041424024	7	10280	26.29501915	28.15539552	1.15797896	0.609346549	4366.14032
208407	2015	6.062434054	7	10519	27.22538369	28.69568459	1.667669901	0.787146911	3454.598295
208407	2016	6.637990294	7	10791	27.40192677	29.0201961	1.192766764	1.042531239	3546.295511
208412	2010	2.976797802	5	9179	27.13175921	27.87212266	1.344194595	0.836003692	1024.664407
208412	2011	2.844338494	6	9317	26.54961961	27.36690209	1.296414315	0.802351242	1079.258975
208412	2012	3.557644471	7	9452	26.44647667	27.76426312	1.234821312	0.713998549	956.4299317
208412	2013	3.790859551	9	9587	26.9765194	27.94416324	1.14993534	0.961244825	1118.7722
208412	2014	2.386386168	9	9725	26.60718078	27.70680625	1.34428901	0.585255707	1112.862765
208412	2015	3.809154869	7	9868	27.65166115	27.65517	1.847643242	0.730199892	1104.655721
208412	2016	4.812845199	11	10026	27.35853459	27.89782381	1.350123108	0.781452896	1175.409253
208414	2010	3.113834696	6	4235	27.13175921	27.87212266	1.344194595	0.836003692	1045.259535
208414	2011	3.002510501	6	4320	26.54961961	27.36690209	1.296414315	0.802351242	1124.839732
208414	2012	3.709475212	5	4404	26.44647667	27.76426312	1.234821312	0.713998549	1000.317541
208414	2013	3.930601801	8	4487	26.9765194	27.94416324	1.14993534	0.961244825	1286.169133
208414	2014	2.465574519	7	4574	26.60718078	27.70680625	1.34428901	0.585255707	1304.857263
208414	2015	3.990739863	5	4659	27.65166115	27.65517	1.847643242	0.730199892	1319.425471
208414	2016	4.997727489	7	4757	27.35853459	27.89782381	1.350123108	0.781452896	1262.002974
208422	2010	3.3279112	5	3837	26.92917411	27.96601635	1.357437702	0.888611928	1086.757739
208422	2011	3.227220393	6	3884	26.37684415	27.4756212	1.303708056	0.827972552	1079.104365
208422	2012	3.838579019	6	3925	26.23291069	27.82708246	1.216940705	0.851695315	1087.428508
208422	2013	4.079165218	5	3972	26.7804196	27.84421119	1.092039278	1.026417179	1331.000804
208422	2014	2.554587778	5	4017	26.39325181	27.68480178	1.303848564	0.65169497	1304.19801
208422	2015	4.169965254	8	4067	27.53421784	27.70062602	1.923108448	0.774808734	1354.735569
208422	2016	5.068881731	8	4113	27.16685674	27.92748014	1.295626673	0.884303012	1317.117464
208432	2010	4.209340404	14	33727	26.53578336	27.36526593	1.128560326	0.766022238	1576.306523
208432	2011	4.172896959	19	34613	26.00892409	26.8014983	0.956520818	0.83206477	1757.15933
208432	2012	4.652210335	18	35572	25.84847774	27.31639613	0.991799523	0.787734655	1866.556042
208432	2013	4.902647582	17	36425	26.58736962	27.51847704	0.966819185	1.025517184	1925.578097
208432	2014	3.116269023	27	37293	26.13775535	27.28223676	1.209317591	0.614480611	1972.197506
208432	2015	5.473515455	30	38182	26.94494884	27.53913772	1.67352532	0.632110004	1766.489625
208432	2016	6.076882137	25	39020	27.03772825	27.63776358	1.150273223	0.825637302	1724.540971
208452	2010	1.202014294	12	13076	28.16078277	27.2630592	1.048001089	0.784907359	817.4688919
208452	2011	1.068723118	9	13396	27.10586054	27.13756399	1.443038029	0.753426428	917.6536777
208452	2012	1.418304575	8	13707	28.01786674	27.70630433	1.445087284	0.744715828	1003.782716
208452	2013	1.534325171	10	14021	28.51400933	27.29334027	0.97747202	0.672456558	989.7834263
208452	2014	1.004741422	14	14340	27.3851836	27.32962773	0.9907009	0.541312209	1031.260017
208452	2015	1.245197069	7	14665	27.92449541	27.25694251	0.994433018	0.557535469	921.8327742
208452	2016	1.593767601	10	15004	27.6341197	27.56436582	0.985232197	0.499837742	1002.637264
208462	2010	1.225441219	9	13370	28.06511687	27.28850177	1.022576312	0.792640818	797.7602778
208462	2011	1.083126419	6	13679	27.11501194	27.17428891	1.398817538	0.769755148	905.5240914
208462	2012	1.37683778	6	13985	27.89735555	27.60480128	1.395816632	0.773142048	893.3620784
208462	2013	1.46780094	11	14294	28.38231248	27.27644678	0.958224959	0.660658972	944.1778075
208462	2014	0.97729342	5	14609	27.35861856	27.38793132	1.000508716	0.557031573	1031.480585
208462	2015	1.264735842	7	14928	27.86160318	27.32655363	1.015767438	0.575971632	1007.99472
208462	2016	1.630647536	9	15273	27.64873953	27.55658637	0.953997463	0.543664525	1039.792264
208472	2010	2.893193056	8	6919	27.58980334	27.682644	1.31366121	0.894921411	1147.662831
208472	2011	2.679210131	10	7055	27.20111415	27.52474172	1.418187706	0.716290208	1224.904444
208472	2012	3.888259781	7	7186	27.16007901	27.88166005	1.368316772	1.015506326	1219.420693
208472	2013	4.174461967	6	7318	27.70657379	27.79300419	1.107297064	0.979667074	1321.731666
208472	2014	2.698612648	10	7452	27.09236136	27.558361	1.26693894	0.624493345	1515.690706
208472	2015	4.637804109	8	7588	28.20882709	27.67632739	1.856004658	0.767840591	1393.49889
208472	2016	5.738987241	7	7717	28.00454515	27.93781453	1.527991339	0.914557854	1523.547221
208482	2010	3.910914132	217	158410	26.43288235	27.54833368	1.023300037	0.825672845	3689.414602
208482	2011	3.783344642	260	160167	25.731065	26.96708949	0.914135059	0.889579954	3824.699548
208482	2012	3.973358532	288	161975	25.57028325	27.28254502	0.901850875	0.735180596	4862.543389
208482	2013	4.11022199	374	163762	26.16609358	27.10851593	0.873263922	0.810928429	5255.476219
208482	2014	2.75030179	363	165583	25.91543624	27.18292538	1.009162487	0.520435275	5577.065094
208482	2015	5.133264905	397	167440	26.70826821	27.46036427	1.487197095	0.630764291	5297.906381
208482	2016	5.503212591	362	169480	27.07051933	28.31103877	1.145598722	0.862162833	5680.533605
208487	2010	3.446640967	9	7388	26.50427525	27.04980307	1.196833573	0.805021175	1127.388092
208487	2011	3.305852857	7	6442	25.92090283	26.55304812	1.116820913	0.84402479	1194.484212
208487	2012	3.901678613	7	6873	25.74194221	26.89169399	1.046246455	0.828149136	1029.090675
208487	2013	4.141743036	10	7078	26.37283128	26.97212462	0.984240047	0.956247572	1308.788228
208487	2014	2.702124442	5	7245	25.94294371	26.97131398	1.23281199	0.607148961	1129.348985
208487	2015	4.548701359	8	8466	26.85012195	27.09212926	1.735712869	0.642934003	975.7039429
208487	2016	5.054893514	6	8675	26.94610073	27.40751236	1.223257631	0.918850728	1002.858424
208492	2010	1.861717477	16	35620	28.37463795	27.8914164	1.187229425	0.981047369	1432.628985
208492	2011	1.585958332	19	36355	27.83600687	27.58671398	1.886054812	0.931344636	1517.508108
208492	2012	2.433797007	24	37078	28.16411581	28.45808025	1.669401691	1.146938663	1603.955527
208492	2013	2.637243031	18	37779	28.66986277	27.62346489	1.158507619	0.885151813	1584.11316
208492	2014	1.665219073	25	38503	27.88831936	27.82866631	1.494247952	0.733335981	1730.381634
208492	2015	2.46398324	26	39243	28.73544054	27.72573928	1.487735365	0.791118096	1635.808988
208492	2016	3.316778481	21	40069	28.17955743	28.25623488	1.260369252	0.773061588	1698.749912
208497	2010	3.539639022	6	4692	26.61609001	27.7152434	1.305541954	0.794105915	1065.366303
208497	2011	3.468340509	7	4869	25.94261117	26.96292339	1.130631742	0.832138545	1166.709851
208497	2012	4.168051615	7	5040	25.88846513	27.47489224	1.137977693	0.75850754	1074.345534
208497	2013	4.390575146	7	5201	26.4596987	27.76286892	1.084903938	0.958528117	1018.450783
208497	2014	2.689373818	6	5374	26.15473479	27.45962567	1.258118174	0.579648623	1247.401792
208497	2015	4.511832806	6	5549	27.1740705	27.38167383	1.907652894	0.681030823	1122.668232
208497	2016	5.433297263	7	5727	26.88473328	27.61073236	1.254858691	0.843140114	1153.30145
208499	2010	3.716672814	8	7977	26.69026912	27.22666425	1.206296655	0.742818758	960.2350313
208499	2011	3.61612314	7	8152	26.21354014	26.72090224	1.141522549	0.797423431	1037.435531
208499	2012	4.270450871	6	8327	25.9537762	27.32053293	1.020655502	0.766058581	1064.046877
208499	2013	4.510007328	6	8501	26.61588641	27.42365192	0.92681543	0.958347797	1088.179093
208499	2014	2.860200027	6	8677	26.1229689	27.05683483	1.187990487	0.598150356	1177.320039
208499	2015	4.906315624	6	8859	27.0680213	27.31533838	1.770656355	0.647302052	1129.94338
208499	2016	5.482771036	5	9011	27.09247072	27.6079026	1.181932424	0.888207446	1108.562911
208502	2010	3.924169581	6	12211	26.13513463	27.56025538	1.105286074	0.817005314	1610.345564
208502	2011	3.845163307	9	14155	25.45280821	26.68312905	0.966056428	0.891338548	1483.534764
208502	2012	4.025224559	7	14287	25.26528233	27.04606839	0.930410685	0.840088032	1561.246964
208502	2013	4.146287722	6	14435	25.89396371	26.8606194	0.908504411	0.880320008	1521.608368
208502	2014	2.690079504	9	14571	25.58495908	26.96216609	1.104972805	0.604010622	1818.824435
208502	2015	5.181463923	9	14713	26.45518216	27.34524999	1.563626034	0.774236224	1746.647085
208502	2016	5.545799328	10	14889	26.71936863	27.88436874	1.136066053	0.945102349	1800.518978
208512	2010	3.23220852	11	8944	27.37254118	27.97301517	1.370015782	0.835969152	1118.118573
208512	2011	3.096156429	8	9161	26.91251734	27.7619117	1.328627603	0.757142636	1251.815323
208512	2012	3.895869158	10	9311	26.8392148	27.89897962	1.281668284	0.975615415	1140.305646
208512	2013	4.199248511	11	9465	27.38560907	28.05537549	1.08616449	1.051718523	1216.362647
208512	2014	2.747793343	9	9620	26.7996967	27.74667903	1.207391377	0.642861784	1373.926856
208512	2015	4.398950564	8	9780	27.9434465	27.76539434	1.848990756	0.803270254	1159.167624
208512	2016	5.358589783	9	9909	27.81001219	28.14578761	1.463570695	0.973533148	1261.81075
208522	2010	2.829909754	20	26597	26.81132075	27.19364584	1.274676407	0.778493408	1185.459449
208522	2011	2.679155866	17	27201	26.18019069	26.93652221	1.064532572	0.67811758	1233.104605
208522	2012	3.365424773	16	27801	26.14161738	26.89391552	1.155231973	0.976745434	1356.987051
208522	2013	3.616623655	27	28395	26.70899534	26.8572001	0.997593507	0.940169673	1379.306121
208522	2014	2.683844005	26	29005	26.28248859	26.94001539	1.236600918	0.606747132	1429.112928
208522	2015	4.163782955	17	29624	27.18836043	26.99336225	1.649837578	0.682181461	1498.2916
208522	2016	4.771899425	11	30231	27.11969215	27.20569492	1.295174509	0.91499724	1515.316735
208532	2010	2.939964987	7	6090	27.57438753	28.10719962	1.318051437	0.923036289	974.6370015
208532	2011	2.728121389	5	6216	27.07174308	27.84873082	1.252468167	0.779654123	1086.047226
208532	2012	3.976753313	7	6335	27.04120474	28.02547728	1.284926921	1.117417762	1056.194878
208532	2013	4.254228887	7	5831	27.68302421	27.86831468	1.106677023	1.033310603	1166.280115
208532	2014	2.768281152	7	6349	27.11912581	27.91734868	1.310453183	0.702827097	1206.75114
208532	2015	4.808518567	7	6464	28.16261472	27.97423305	1.825045992	0.800661835	1211.36389
208532	2016	5.908369801	7	6569	27.92824481	28.24914064	1.478404381	0.943852744	1305.66878
208546	2010	2.971618411	6	4685	27.57438753	28.10719962	1.318051437	0.923036289	1411.841001
208546	2011	2.772364731	7	4763	27.07174308	27.84873082	1.252468167	0.779654123	1584.465875
208546	2012	4.014230178	7	4836	27.04120474	28.02547728	1.284926921	1.117417762	1443.646881
208546	2013	4.294984451	5	5534	27.68302421	27.86831468	1.106677023	1.033310603	1460.46906
208546	2014	2.81792721	6	5625	27.11912581	27.91734868	1.310453183	0.702827097	1673.502091
208546	2015	4.861958465	8	5720	28.16261472	27.97423305	1.825045992	0.800661835	1550.879051
208546	2016	5.973763141	8	5792	27.92824481	28.24914064	1.478404381	0.943852744	1639.394096
208548	2010	2.90860007	5	5413	26.59453057	27.38307328	1.249148296	0.873796975	1199.92052
208548	2011	2.781703411	6	6718	25.95274581	26.96619155	1.089940089	0.780788692	1133.118656
208548	2012	3.478434822	7	6650	25.78135541	27.09042805	1.078504305	0.987500595	1224.40811
208548	2013	3.737967487	5	6827	26.46324074	27.06288972	1.027376282	1.019462642	1281.418602
208548	2014	2.813271384	5	7007	26.07162216	27.22313778	1.289709931	0.635617793	1428.669342
208548	2015	4.4759591	5	6143	26.95246582	27.26496886	1.705096109	0.727044641	1445.791828
208548	2016	5.099907808	8	6274	26.98421169	27.55380588	1.294751007	0.947047692	1264.427474
208550	2010	4.591030483	5	4077	26.61422553	28.4532753	1.073654551	0.684255532	1378.445849
208550	2011	4.695240699	5	4185	25.91507589	27.88319855	1.018633507	0.895162903	1436.466251
208550	2012	4.938085172	5	4290	25.80017297	27.87270909	0.974024846	0.928427283	1512.529697
208550	2013	5.082308898	5	4400	26.44731648	27.87473458	0.969017752	0.88342421	1476.909598
208550	2014	3.23277959	6	4508	26.17010253	28.10308774	1.165137283	0.601608427	1644.749848
208550	2015	6.078789657	6	4619	27.05891243	28.34156719	1.606054058	0.724156137	1637.164647
208550	2016	6.597075911	6	4716	27.25930921	28.68822747	1.229330874	0.956738213	1870.657928
208552	2010	2.801704353	8	7189	27.57253521	27.79514545	1.316968616	0.887244861	1069.72111
208552	2011	2.57669749	9	7289	27.22078215	27.68349077	1.55415648	0.701071469	1225.727086
208552	2012	3.763799877	9	7387	27.13908026	27.96947567	1.384738166	0.995026436	1327.945449
208552	2013	4.035540921	7	7487	27.69224407	27.87168957	1.140628496	0.990435312	1473.498492
208552	2014	2.562672972	7	7587	27.02760867	27.64495848	1.258078918	0.589150896	1536.911782
208552	2015	4.493930777	10	7692	28.18302977	27.70925544	1.848769586	0.770063668	3018.163591
208552	2016	5.594490647	16	7786	27.93548427	27.91846099	1.564878412	0.869615736	2351.481989
208562	2010	3.965011354	5	6616	26.68672726	27.52805972	1.266697744	0.881276844	2377.031181
208562	2011	4.216292386	6	6783	26.13463331	27.19508212	1.089785268	0.918344909	1810.873153
208562	2012	4.775178397	6	6946	25.96577006	27.74407317	1.029173228	0.623112023	2488.352987
208562	2013	4.864913851	7	7111	26.56012293	28.10896603	1.079337634	0.96844949	2894.061008
208562	2014	3.502770167	7	7279	26.67206593	27.95573976	1.263113703	0.721084596	2962.105955
208562	2015	5.094686241	5	7448	27.64124333	28.1390388	1.947315669	0.851326266	2922.851505
208562	2016	5.264666316	7	7585	27.39852108	28.67717947	1.438505894	1.021216335	2008.300502
208587	2010	2.861886618	5	3947	26.36332586	26.79014279	1.195282816	0.775039712	1380.218878
208587	2011	2.683366652	5	3922	25.69917786	26.41502974	1.086450131	0.713934162	1533.00119
208587	2012	3.309994762	5	3977	25.56742008	26.39012852	1.116809678	0.89988847	1556.254011
208587	2013	3.55488136	5	4032	26.25057616	26.29773566	1.027955499	0.89042718	1728.315099
208587	2014	2.611610719	5	4091	25.79649744	26.60390717	1.204155194	0.607197222	1613.051799
208587	2015	4.320435065	6	4152	26.65722549	26.72266187	1.623079907	0.659276957	1426.549555
208587	2016	4.90236126	5	4213	26.72662458	26.78286024	1.245498877	0.856243053	1341.779984
208592	2010	2.181603989	8	8339	28.52782619	28.19002652	1.328549895	0.93347387	1257.080478
208592	2011	1.903433663	8	8517	27.9528837	27.89017208	1.962312044	1.001696969	1448.916726
208592	2012	2.997237688	10	8693	28.38445845	29.0314311	1.920640627	0.916502309	1369.87075
208592	2013	3.301577333	11	8865	29.15212241	27.78949607	1.360568149	0.996952674	1351.451801
208592	2014	1.914394693	7	9041	28.13530955	27.97243591	1.527366219	0.61507337	1624.477213
208592	2015	2.726475368	13	9219	28.97053046	27.81466001	1.654800125	0.782597167	1427.770323
208592	2016	3.860152123	8	9399	28.31923129	28.24424881	1.373831608	0.771967507	1372.949176
208615	2010	2.075143624	7	7894	28.25892765	27.85019938	1.149974179	0.882153901	951.4725367
208615	2011	1.770482048	6	8161	27.82143853	27.57178694	1.713742365	0.767622346	955.0780317
208615	2012	2.896889688	6	8416	28.05553868	28.35999416	1.661241406	1.042463402	928.5590719
208615	2013	3.110577601	6	8660	28.65157493	27.60826635	1.16174532	0.832288532	932.7562072
208615	2014	1.85751979	7	8913	27.86664869	27.78330597	1.44117012	0.640922779	1025.922276
208615	2015	2.919881088	9	9167	28.78425176	27.78303505	1.578206955	0.669354536	962.5362843
208615	2016	3.970544271	15	9514	28.23251743	28.32164264	1.306424036	0.719363539	999.2330421
208622	2010	4.35989954	8	11324	26.07090047	27.58679314	1.269471187	0.906311675	1275.27113
208622	2011	4.564125237	6	11498	25.41469051	27.01693525	0.997217797	1.000988146	1301.386767
208622	2012	5.310623151	7	11703	25.35797718	27.5755933	1.074322484	0.757100414	1411.765606
208622	2013	5.468027112	6	11909	26.0175787	28.0091622	0.994994451	1.172141319	1454.31135
208622	2014	3.366837827	9	12116	25.81954088	27.89440495	1.272795652	0.719170334	1623.477306
208622	2015	5.686133354	5	12329	26.85858672	27.95863722	2.050278503	0.904787651	1709.043831
208622	2016	6.305354007	5	12539	26.5008576	28.25513983	1.294740679	1.235163879	1502.166974
208627	2010	1.951952476	9	15133	28.29881107	28.00981714	1.125701615	0.958998315	2812.5648
208627	2011	1.661083322	10	15538	27.74724057	27.58961551	1.674307331	0.863180223	2602.863965
208627	2012	2.543150267	11	15917	28.00707915	28.32321565	1.574516965	1.144053184	2721.460762
208627	2013	2.735317207	7	16284	28.53965714	27.57208257	1.101929781	0.775543903	2475.876168
208627	2014	1.710246642	13	16651	27.80598461	27.85588004	1.414884872	0.740208576	3022.360187
208627	2015	2.600733692	10	17039	28.62445699	27.8494803	1.462183386	0.767399004	3795.435393
208627	2016	3.444447887	12	17496	28.16070566	28.3686601	1.197483457	0.742352235	3469.608551
208652	2010	4.332667734	5	5493	26.32027162	27.89245601	1.061153797	0.643232182	1094.453306
208652	2011	4.36533172	5	5541	25.64507937	27.19199527	0.969635302	0.858643144	1141.508433
208652	2012	4.577808843	5	5590	25.50931961	27.31532868	0.95334057	0.816953093	1198.889806
208652	2013	4.72677652	6	5644	26.14919237	27.41173542	0.908615896	0.818874811	1265.220412
208652	2014	3.000255536	6	5697	25.85112866	27.32452048	1.117149742	0.538650501	1347.007777
208652	2015	5.639503598	5	5754	26.69683813	27.87369377	1.48549544	0.625183624	1369.973812
208652	2016	6.067408809	7	5792	26.91093124	28.15516303	1.164842228	0.885281674	1385.652482
208662	2010	1.682835695	8	9098	28.07733582	27.11758837	1.126149731	0.844409648	922.0931396
208662	2011	1.444089348	6	9355	27.20705441	27.10414854	1.619556284	0.860257825	1046.152031
208662	2012	2.048380568	8	9606	27.94984983	27.63348615	1.588463707	0.884624593	1094.818299
208662	2013	2.222085784	6	9856	28.45230804	27.22302637	1.087101415	0.737494542	1069.479252
208662	2014	1.452334306	9	10109	27.3541103	27.29935272	1.130450943	0.590877986	1252.72483
208662	2015	2.015921099	12	10373	27.89086558	27.26629926	1.1529798	0.618636256	1122.492873
208662	2016	2.551655946	8	10636	27.6214933	27.53723818	1.02088759	0.625532316	1199.102387
208672	2010	1.964026569	6	6181	28.62111974	28.05472128	1.292061339	1.022000054	769.6624384
208672	2011	1.673779443	7	6394	27.99590491	27.76911015	1.988014167	1.023874698	844.8557392
208672	2012	2.656497685	6	6602	28.4867703	29.00445639	1.845536238	1.048662809	917.2225236
208672	2013	2.891299425	8	6805	29.14330701	27.94214822	1.324523639	1.006036651	841.8576761
208672	2014	1.731942646	8	7014	28.15648894	27.91970655	1.595783913	0.693631263	909.9501581
208672	2015	2.532880856	8	7228	28.94926733	27.82922859	1.56961515	0.808573285	808.969056
208672	2016	3.461388238	7	7444	28.39114929	28.23927448	1.26758849	0.824355882	865.8834663
208677	2010	3.981829192	5	2678	25.74561609	26.80692525	1.217036093	0.892895987	1818.766646
208677	2011	4.246559158	7	2751	25.209966	26.57578926	0.950204767	0.898516603	1776.36305
208677	2012	4.39904256	5	2826	25.03507273	26.73315318	0.9132522	0.62458075	2044.727502
208677	2013	4.462224789	5	2898	25.70341047	27.24206694	1.037030311	0.897174769	2243.399826
208677	2014	3.24788614	7	2967	25.57037067	27.02877913	1.134281012	0.740516389	2160.351673
208677	2015	5.453307494	6	3042	26.35965976	27.48763649	1.648629682	0.758426578	2126.310453
208677	2016	5.699988994	5	3124	26.46293558	27.78755762	1.392348235	0.998039079	1871.893947
208682	2010	3.067442484	8	2781	27.17926087	27.77296173	1.381709216	0.826070685	1137.609447
208682	2011	3.228739901	5	2818	26.58298911	27.21338749	1.202521055	0.951361597	1125.143118
208682	2012	3.953854334	5	2860	26.46753878	28.32197383	1.151209259	0.757732881	1265.007678
208682	2013	4.066007261	5	2895	26.96776776	28.68118204	1.169957923	0.996971441	1309.450123
208682	2014	2.520295311	5	2932	26.95280981	28.63373209	1.368801377	0.762410038	1461.891759
208682	2015	4.273371347	6	2974	27.9595109	28.37095821	2.146184084	1.025378535	1492.797019
208682	2016	5.063464396	5	3000	27.65188681	28.94447699	1.415607632	1.026511626	1475.565681
208722	2010	2.988697555	10	12175	26.49194588	27.39940132	1.313421987	0.793848967	1097.731854
208722	2011	3.061558332	12	12433	25.83129538	26.75641766	1.136570243	0.958183835	1137.191023
208722	2012	3.91618515	14	12693	25.70733447	27.78605817	1.095555075	0.7605303	1147.803378
208722	2013	4.081154625	10	12950	26.29756546	28.15961939	1.140613336	1.029479021	1182.944759
208722	2014	2.445403657	11	13221	26.18860739	28.04492212	1.297026541	0.702559079	1380.247349
208722	2015	4.209005729	9	13490	27.19355395	27.79685166	2.098671908	0.95180698	1407.071223
208722	2016	5.119802943	10	13728	26.90560339	28.37083091	1.310881972	1.021665164	1333.96495
208742	2010	2.856775088	10	10241	26.2927281	27.39911799	1.298776518	0.756593549	1131.120784
208742	2011	2.846034828	9	10448	25.56062842	26.58166059	1.105887676	0.949548693	1156.846904
208742	2012	3.70565879	16	10649	25.46669658	27.55390836	1.0702228	0.763366474	1214.209092
208742	2013	3.881578097	11	10854	26.07348353	27.79730988	1.13588003	1.067159862	1178.738859
208742	2014	2.269053911	12	11063	25.93274143	27.67132375	1.34308929	0.672546076	1377.813751
208742	2015	3.947913506	10	11277	26.94745802	27.42251254	2.043742397	0.857865956	1336.320631
208742	2016	4.949834221	16	11490	26.60964895	27.9125459	1.34065153	0.978524105	1362.9122
208752	2010	3.194314224	10	10607	26.81101542	27.4955731	1.331003002	0.826790785	1218.758172
208752	2011	3.346242017	6	10805	26.16125191	26.93544411	1.119044112	0.915806758	1296.745552
208752	2012	4.122841542	8	10998	26.07861085	27.86324676	1.132362715	0.703277719	1501.890612
208752	2013	4.216761475	10	11193	26.59780343	28.25872022	1.122884776	0.954492771	1590.526247
208752	2014	2.576837429	8	11393	26.57168344	28.19737735	1.305998903	0.728568257	1987.029467
208752	2015	4.355500847	9	11601	27.50223819	28.03116355	2.039247628	0.937777144	1920.600915
208752	2016	5.235240029	9	11804	27.3123413	28.49874111	1.368971676	0.969438937	1706.039947
208757	2010	1.292553956	7	7260	27.53732509	27.73974444	0.68844583	0.408467735	861.5613168
208757	2011	1.161679968	5	7451	26.70675459	27.34170237	0.849831369	0.455696363	989.6260576
208757	2012	1.649637858	5	7648	27.16837588	27.4338305	0.813399736	0.361857475	1052.320082
208757	2013	1.826170448	5	7837	27.53545092	27.45223412	0.633959672	0.392933127	1087.405144
208757	2014	1.112661249	7	8032	26.97168226	27.50352258	0.59764475	0.300811654	1118.761729
208757	2015	1.406473288	12	8229	27.28100557	27.35118218	0.638526419	0.322655791	1066.616318
208757	2016	1.896457378	11	8424	27.2844922	27.58623573	0.613091107	0.353957626	1298.031501
208762	2010	2.868041589	13	11239	26.91014116	27.20605192	1.223624316	0.776067803	1261.226876
208762	2011	2.642838928	9	11460	26.27089196	26.83558563	1.120301331	0.706250758	1321.1535
208762	2012	3.334425594	12	11644	26.25237748	26.84146669	1.240124708	0.990297038	1370.465808
208762	2013	3.570814038	17	11834	26.83208918	26.7283008	1.040838612	0.85013505	1457.341996
208762	2014	2.576796552	16	12019	26.38069294	26.94421051	1.226541497	0.645210415	1553.427412
208762	2015	4.216112244	12	12127	27.21075026	27.07027507	1.619654116	0.682122001	1476.056984
208762	2016	4.782995029	11	12320	27.1758173	27.14440592	1.253729462	0.871997369	1514.797938
208772	2010	2.854109895	13	25136	27.57253521	27.79514545	1.316968616	0.887244861	2167.244556
208772	2011	2.64274209	20	25290	27.22078215	27.68349077	1.55415648	0.701071469	2141.796741
208772	2012	3.809498493	18	25454	27.13908026	27.96947567	1.384738166	0.995026436	2196.220985
208772	2013	4.078575326	28	25635	27.69224407	27.87168957	1.140628496	0.990435312	2277.96691
208772	2014	2.652041069	23	25369	27.02760867	27.64495848	1.258078918	0.589150896	2614.103826
208772	2015	4.604342846	19	25549	28.18302977	27.70925544	1.848769586	0.770063668	2496.169457
208772	2016	5.671784972	20	25714	27.93548427	27.91846099	1.564878412	0.869615736	2667.63433
208797	2010	2.605624065	6	12149	27.51498555	27.59329449	1.286187118	0.877557668	1170.273613
208797	2011	2.364617788	9	12337	27.13920118	27.47856691	1.587166741	0.664826149	1256.981628
208797	2012	3.402279336	11	12515	27.08718808	27.79257187	1.403214528	0.947857859	1264.81117
208797	2013	3.686133814	15	12700	27.62646476	27.91802051	1.160503034	0.912606256	1362.81086
208797	2014	2.338681856	12	12881	26.92612202	27.37465317	1.230050807	0.53903283	1534.639933
208797	2015	3.752707726	23	13073	28.0889674	27.43145582	1.797320709	0.684532145	1401.475474
208797	2016	4.689766883	13	13306	27.76141605	27.6394758	1.530615115	0.825073435	1539.071876
208832	2010	2.161758988	9	9456	28.36593281	27.94353186	1.241178863	0.946768716	1012.085235
208832	2011	1.842649173	6	9620	27.9483635	27.74492542	1.959567395	0.855256136	1081.758989
208832	2012	3.13621579	11	9778	28.19639764	28.60318792	1.774076219	1.117579073	1045.514278
208832	2013	3.384831422	12	9944	28.82349224	27.77616318	1.240465524	0.957315581	1052.39506
208832	2014	1.919521125	10	10105	27.91754599	27.95090667	1.524722742	0.679001288	1278.256782
208832	2015	3.091421006	10	10274	28.96698646	27.83768448	1.665114661	0.755562034	1151.714869
208832	2016	4.32116431	14	10471	28.25916769	28.44202089	1.405325628	0.756521341	1249.460888
208842	2010	2.813140506	6	12172	27.16327004	27.55942119	1.337268466	0.815055149	1435.005466
208842	2011	2.676052053	6	12320	26.62839043	27.39585078	1.193438205	0.723291208	1485.413421
208842	2012	3.541659991	7	12318	26.61342534	27.36611262	1.239713524	1.006962919	1468.304427
208842	2013	3.818608952	13	12343	27.14083338	27.44443877	1.027597632	1.010282754	1483.45819
208842	2014	2.781890217	11	12359	26.61006003	27.37183127	1.233993967	0.639299841	1673.700602
208842	2015	4.294089841	15	12373	27.66154439	27.37509144	1.713816803	0.750836458	1507.886882
208842	2016	5.06457558	18	12314	27.50832534	27.6380652	1.392001855	0.942101552	1665.412518
208852	2010	4.204122979	11	13036	26.70143447	27.96803836	1.036571344	0.587057875	3250.90416
208852	2011	4.41243125	9	13339	26.0483109	27.52732423	1.011762436	0.862685436	3330.892943
208852	2012	4.466369199	11	13634	25.88548158	27.56639644	0.946026441	0.743946117	5467.709153
208852	2013	4.543801194	6	13923	26.54514735	27.71664236	0.956198384	0.818751707	5704.376642
208852	2014	3.293725497	12	14219	26.28502185	27.77654544	1.078613547	0.592447316	4417.115998
208852	2015	5.582448218	13	14524	27.07780556	27.96052356	1.51591679	0.633798812	4078.341088
208852	2016	5.846290015	12	14836	27.31256646	28.28576317	1.196443095	0.856567432	4394.360038
208862	2010	3.233732703	19	27654	27.14948312	27.72687577	1.356268956	0.835608862	1942.433845
208862	2011	3.107981733	26	28161	26.67592604	27.49929012	1.322241503	0.767483658	1864.948704
208862	2012	3.805924605	35	28662	26.59721839	27.80839532	1.268081796	0.872572198	2008.556273
208862	2013	4.076014997	42	29161	27.10904219	27.92392138	1.055976504	1.000689115	2174.534065
208862	2014	2.616955193	31	29666	26.54808369	27.50049314	1.160530216	0.642188708	2472.131662
208862	2015	4.19553642	49	30187	27.74561036	27.50477643	1.856702513	0.776944036	2183.477471
208862	2016	5.012401176	38	30651	27.48760395	27.76872909	1.341456184	0.883102378	2285.146176
208882	2010	1.755569474	5	5539	28.53232757	27.93930751	1.259591777	1.011071524	935.8170041
208882	2011	1.482453282	7	5653	27.95953432	27.68985783	1.996686344	0.991980603	983.3308081
208882	2012	2.153424792	7	5765	28.36794214	28.75870354	1.778165202	1.11803656	1000.743769
208882	2013	2.350155686	9	5882	28.92532307	27.82545032	1.233886813	0.974449306	1082.740608
208882	2014	1.578647952	5	5997	28.04743105	27.891234	1.561123207	0.713969792	1185.45409
208882	2015	2.182961637	6	6115	28.89150702	27.75322039	1.528583399	0.806188658	1100.300973
208882	2016	2.848026072	6	6250	28.29838546	28.23498804	1.283941111	0.806740286	1046.993422
208892	2010	1.385212668	6	7121	28.15531365	27.23589375	1.032105688	0.740664381	735.9562291
208892	2011	1.234509663	6	7299	27.03794489	27.07731704	1.405790424	0.695394667	927.1636469
208892	2012	1.708673674	8	7480	27.992905	27.72572471	1.430520147	0.64213032	950.7395159
208892	2013	1.852960517	7	7655	28.4952442	27.34511245	0.961500675	0.652207401	970.5155019
208892	2014	1.194205592	6	7839	27.37620737	27.26208192	0.969297829	0.49742302	1037.769219
208892	2015	1.510788236	7	8023	27.89092819	27.16080846	0.948953066	0.500474323	1034.255847
208892	2016	1.959165539	7	8234	27.59139306	27.51427268	0.974422676	0.442007357	1043.361839
208902	2010	4.547057692	11	11753	26.14011139	27.83687574	1.204926316	1.03098358	2273.349438
208902	2011	5.236186507	11	11904	25.57484548	27.64009527	0.955967256	1.023660194	2340.120438
208902	2012	5.343695758	10	12063	25.34666599	27.7157499	1.007891146	0.811158254	2980.446644
208902	2013	5.16041109	9	12233	26.09747654	28.0398759	1.063002775	1.011140982	3274.179058
208902	2014	3.713310045	10	12399	26.00187529	28.07349668	1.240548212	0.944541162	3259.245141
208902	2015	5.845987156	12	12570	26.69024995	28.32811693	1.601323715	0.820478529	3029.375323
208902	2016	5.812022193	15	12740	26.9929038	28.55211136	1.526949849	1.258263171	2260.107476
208907	2010	4.260084542	7	4212	26.81198919	28.18916181	1.051802165	0.649128842	1615.462463
208907	2011	4.26374893	5	4311	26.1398228	27.74822915	1.025460816	0.88154739	1753.857095
208907	2012	4.478559439	5	4408	25.97493533	27.8944952	0.938986411	0.845669749	1733.943889
208907	2013	4.668822914	5	4507	26.58475966	27.84111139	0.917557423	0.859171991	1786.965785
208907	2014	3.087349855	5	4606	26.34175725	27.93123532	1.088097676	0.585361002	1780.810794
208907	2015	5.807603656	6	4709	27.24154452	28.22552581	1.595471964	0.683054818	1961.133563
208907	2016	6.331142994	7	4776	27.40500947	28.63758573	1.176721378	0.969558408	1938.20289
208922	2010	4.107615504	5	3095	26.54727096	27.66627455	1.274632456	0.873124851	5419.147211
208922	2011	4.51003312	5	3169	25.95056216	27.39212189	1.09271511	0.924108941	5237.026231
208922	2012	5.044545488	9	3245	25.7712643	27.81029494	1.025312461	0.657592583	7960.125141
208922	2013	5.038011481	6	3320	26.30513305	28.15296765	1.115040822	1.005544635	8676.397955
208922	2014	3.684658722	5	3399	26.47480641	27.99362317	1.258942287	0.741691226	8148.043007
208922	2015	5.266403602	6	3475	27.38033271	28.37077771	1.865565955	0.887849701	8796.317435
208922	2016	5.335245413	6	3549	27.2984205	28.82505182	1.522324354	1.03293063	3291.869746
208927	2010	3.575191842	9	3897	26.77845529	27.69472261	1.318775744	0.83467976	1144.751331
208927	2011	3.497498684	5	3990	26.21154298	27.33974526	1.212764976	0.773991816	1185.52267
208927	2012	4.226628606	5	4078	26.05714258	27.62133451	1.122980848	0.859706973	1215.208236
208927	2013	4.460222421	6	4179	26.63391501	27.65339774	0.988351021	0.999162011	1308.298321
208927	2014	2.768746346	5	4267	26.18423323	27.44846896	1.173260969	0.612203103	1458.161712
208927	2015	4.481332329	9	4352	27.38530268	27.50819563	1.857902996	0.726301043	1195.8109
208927	2016	5.268563795	6	4446	27.03699944	27.67301141	1.214714617	0.878841091	1106.572464
208952	2010	2.982847602	15	40197	26.67261211	26.86804627	1.179534936	0.782610067	1508.794566
208952	2011	2.667285833	14	40795	26.0356778	26.34641157	1.1593773	0.689158235	1645.09047
208952	2012	3.240734673	21	41403	25.97959705	26.34825362	1.248596386	1.013602356	1513.80838
208952	2013	3.440956381	10	42026	26.61159019	26.21449026	0.985616948	0.74730781	1612.84827
208952	2014	2.392274089	15	42643	26.12588355	26.39807518	1.173756945	0.593869104	1639.698845
208952	2015	4.286775461	17	40739	26.96520208	26.66114565	1.495017578	0.675616879	1481.758398
208952	2016	4.741527038	21	41439	26.9909095	26.72752758	1.250342235	0.817602347	1621.413937
208972	2010	1.641044603	13	19295	28.31296099	27.50558885	1.12594345	0.886939157	999.5869373
208972	2011	1.407504636	7	19849	27.57931342	27.30157847	1.698139664	0.868498269	1161.342261
208972	2012	1.949405579	15	20381	28.07445543	27.87263756	1.599690202	1.013718874	1214.101151
208972	2013	2.096842304	9	20893	28.49495059	27.43860422	1.071094806	0.78052664	1211.98997
208972	2014	1.465347922	18	21420	27.67098553	27.59027455	1.276732657	0.663957219	1392.917746
208972	2015	2.037735238	13	21964	28.29671836	27.52282741	1.284742259	0.70678034	1507.178701
208972	2016	2.632117169	9	22487	27.99681857	27.91246179	1.096595458	0.704842588	1513.745874
208975	2010	1.718060513	9	6449	28.3974628	28.16702223	1.179071807	0.717482076	771.5256738
208975	2011	1.509561627	10	6654	27.44237834	28.08091192	1.664812094	0.979199413	884.7626035
208975	2012	2.011974613	6	6862	28.45815228	28.85651466	1.607025635	0.690582229	887.0932108
208975	2013	2.255344524	10	7058	28.9983055	28.1863988	1.206339012	0.833482116	953.4521574
208975	2014	1.516652201	8	7263	27.84591075	27.99051177	1.236916484	0.524190435	995.6628193
208975	2015	1.957308879	7	7470	28.42228436	27.90426684	1.227853349	0.581858835	933.6852406
208975	2016	2.66863588	10	7704	28.08103566	28.16336036	1.210254257	0.556344635	895.0932159
208979	2010	1.185315306	7	7020	27.84754452	27.40079618	0.768192879	0.476739617	712.9068557
208979	2011	1.057718336	6	7233	26.87945571	27.11775363	0.953263392	0.44738769	751.0279333
208979	2012	1.411312149	6	7441	27.49343628	27.40923661	0.980899986	0.357409086	830.3800242
208979	2013	1.524143671	8	7649	27.92686883	27.26234917	0.699685504	0.429931129	928.9411895
208979	2014	1.002643667	5	7857	27.13702162	27.26096931	0.63691344	0.366387379	1112.943639
208979	2015	1.244927131	6	8071	27.48065047	27.10398293	0.66683828	0.335646955	966.6639642
208979	2016	1.607876489	7	8299	27.40478622	27.42399381	0.706037671	0.293421919	1017.01271
208982	2010	2.895501456	8	8670	27.44606255	27.75280546	1.343696367	0.882152977	1584.37847
208982	2011	2.725305753	9	8795	27.02914868	27.75761478	1.442077535	0.702005023	1760.881637
208982	2012	3.825370076	9	8922	26.95004034	27.87729635	1.331639808	1.012106899	2891.647373
208982	2013	4.103190465	8	9049	27.50668376	27.90798292	1.131281971	0.999643494	32925.70623
208982	2014	2.729711964	8	9204	26.83109175	27.60704618	1.200482634	0.605036492	13993.62248
208982	2015	4.467570717	9	9342	27.99113351	27.6470526	1.82996774	0.793201182	14722.33934
208982	2016	5.377374318	8	9451	27.80922094	27.81234355	1.502626027	0.936815094	18528.46016
208992	2010	2.000202506	8	9071	28.59032328	28.14082991	1.285219475	0.997673595	835.9394964
208992	2011	1.754071398	14	9228	27.92571856	27.80187437	1.919474251	1.036967218	1038.923287
208992	2012	2.633001116	9	9384	28.46498848	29.02632074	1.839912807	0.957282961	939.1843183
208992	2013	2.862150653	9	9540	29.17539358	27.91885962	1.350699502	0.993797149	939.3934
208992	2014	1.756707854	12	9699	28.16019583	27.89231771	1.575008917	0.672506647	1176.114268
208992	2015	2.482942249	10	9861	28.8678948	27.87069287	1.555275905	0.80098838	1095.59326
208992	2016	3.378111136	12	10030	28.36183701	28.21802549	1.247036206	0.804892744	1183.776156
209017	2010	3.466244762	8	3919	26.41837206	27.27256059	1.289871428	0.839165844	4199.365659
209017	2011	3.722726684	8	3997	25.81286644	26.76044147	1.10679841	0.911011468	3209.56499
209017	2012	4.460077359	9	4064	25.73229468	27.60747271	1.120218961	0.705051815	4708.60048
209017	2013	4.515216537	8	4140	26.30665626	28.06681737	1.086150105	0.971813913	6171.150841
209017	2014	2.893172011	6	4215	26.25675643	27.91635636	1.30598644	0.73024891	5290.510713
209017	2015	4.698081169	7	4293	27.19980989	27.82998484	2.030350202	0.928227099	4783.954028
209017	2016	5.300091724	6	4361	27.03438389	28.4203026	1.372784217	1.02022263	3149.297561
209022	2010	3.378625035	19	19654	26.61609001	27.7152434	1.305541954	0.794105915	1512.147768
209022	2011	3.280456227	13	19918	25.94261117	26.96292339	1.130631742	0.832138545	1578.453591
209022	2012	3.992412559	18	20191	25.88846513	27.47489224	1.137977693	0.75850754	1546.306854
209022	2013	4.227113764	16	20474	26.4596987	27.76286892	1.084903938	0.958528117	1649.760652
209022	2014	2.605013864	18	20755	26.15473479	27.45962567	1.258118174	0.579648623	1742.378074
209022	2015	4.301338342	15	21041	27.1740705	27.38167383	1.907652894	0.681030823	1788.058776
209022	2016	5.207508133	12	21349	26.88473328	27.61073236	1.254858691	0.843140114	1547.091536
209032	2010	3.85403127	8	2850	26.45811984	27.45989411	1.259642967	0.862512852	1200.281347
209032	2011	4.046362114	5	2885	25.94728566	26.99701186	1.110689705	0.918605524	1391.600201
209032	2012	4.652635813	6	2923	25.82160103	27.73881359	1.061659476	0.655200201	1559.990422
209032	2013	4.844918427	6	2961	26.45497616	28.24927894	1.064650303	1.024421803	1818.835776
209032	2014	3.534625287	6	2997	26.46130557	28.01234407	1.30336874	0.763646266	1824.564101
209032	2015	5.22298351	6	3036	27.48076216	28.09122296	2.10641754	0.904694011	1812.802373
209032	2016	5.399958653	6	3063	27.17983101	28.75208212	1.387916524	1.138673766	1794.992027
209057	2010	4.722114269	5	6353	26.24152121	28.49883546	1.036141102	0.698543592	1497.095687
209057	2011	4.983043417	5	6478	25.5862298	27.85151759	0.964662221	0.986851111	1693.279175
209057	2012	4.973301373	6	6597	25.4283316	27.70599416	0.953147241	0.871410252	1599.042839
209057	2013	5.008972934	5	6717	26.14392572	27.89902319	0.955051645	0.934164216	1689.763615
209057	2014	3.305138102	7	6838	25.89910969	28.07923128	1.153507202	0.706436934	1861.332759
209057	2015	6.000497903	7	6969	26.65993862	28.32593333	1.587151879	0.734206407	2172.09038
209057	2016	6.204878735	6	7087	26.90761513	28.46829886	1.270463355	1.029398258	2825.276446
209059	2010	2.705985781	5	9442	27.55808179	28.07711696	1.386605898	0.991643576	827.1085691
209059	2011	2.54747706	5	9607	27.11343949	27.62893728	1.551096584	0.8390224	953.4152457
209059	2012	3.383345436	7	9762	27.03839669	28.36027472	1.413949109	0.893950154	960.4763267
209059	2013	3.667903349	9	9923	27.48346101	28.30489084	1.169030633	0.96070549	962.319989
209059	2014	2.213779568	8	10084	26.92500764	27.70451147	1.329463915	0.615020543	1074.971661
209059	2015	3.579603028	8	10251	28.08980638	27.72502159	2.061540417	0.838641654	994.6089866
209059	2016	4.78734755	12	10433	27.79634794	28.01595679	1.616368609	0.859326543	1082.193113
209077	2010	3.06453014	7	4306	27.36984348	27.82219321	1.357073577	0.85702229	1126.495357
209077	2011	2.93642459	7	4396	26.87339715	27.75700889	1.341843538	0.724399291	1174.43743
209077	2012	3.753911144	7	4483	26.8379949	27.85596684	1.303483919	0.956141724	1004.231086
209077	2013	4.011363889	9	4569	27.40857383	27.97211682	1.129875864	1.012392885	1225.089761
209077	2014	2.555679145	7	4651	26.74604079	27.64070381	1.165606398	0.617123933	1443.278285
209077	2015	4.061522712	5	4739	27.88991705	27.63281341	1.82108399	0.796208775	1266.105109
209077	2016	4.940510613	6	4802	27.74193828	27.8557496	1.441646729	0.94450402	1183.131276
209092	2010	2.718144415	9	11757	27.57253521	27.79514545	1.316968616	0.887244861	1267.762198
209092	2011	2.461771289	10	11784	27.22078215	27.68349077	1.55415648	0.701071469	1373.426241
209092	2012	3.666258125	6	11822	27.13908026	27.96947567	1.384738166	0.995026436	1432.304797
209092	2013	3.926153842	7	11884	27.69224407	27.87168957	1.140628496	0.990435312	1621.958449
209092	2014	2.430638443	8	11620	27.02760867	27.64495848	1.258078918	0.589150896	1799.316436
209092	2015	4.313526868	5	11669	28.18302977	27.70925544	1.848769586	0.770063668	1627.657045
209092	2016	5.375134693	7	11732	27.93548427	27.91846099	1.564878412	0.869615736	1452.89154
209102	2010	2.388091153	18	22666	28.17126729	28.27445097	1.222455689	0.941386219	1041.274886
209102	2011	2.041726437	20	23077	27.80673603	27.98819738	1.733082239	0.805265709	1197.75144
209102	2012	3.450442432	14	23482	27.87330397	28.64549595	1.559584547	1.133558978	1265.359177
209102	2013	3.71369411	14	23894	28.54914574	28.0807287	1.201064434	1.008271109	1345.421779
209102	2014	2.104795528	9	24316	27.80019687	28.13345709	1.427632576	0.676828272	1465.283603
209102	2015	3.672023298	13	24749	28.84010276	28.29420768	1.774032823	0.784566539	1468.010706
209102	2016	4.969911314	18	25157	28.33122268	28.56621628	1.475123236	0.792415805	1569.290284
209109	2010	4.550330667	6	2502	25.78919873	27.78114509	1.056574835	0.816838198	1994.508009
209109	2011	4.963381292	8	2571	25.21747203	27.33204477	0.94185296	0.95444069	2047.297986
209109	2012	4.89017337	5	2636	25.01165184	27.09960647	0.934913993	0.75068886	2294.574399
209109	2013	4.844776828	5	2705	25.77152606	27.53277304	0.977639519	0.945584452	2303.090261
209109	2014	3.417755191	7	2771	25.48091729	27.68313789	1.137157077	0.767433167	2480.130922
209109	2015	5.630441497	5	2841	26.21035222	27.83907969	1.541045278	0.65192199	2308.940055
209109	2016	5.75249494	6	2894	26.42855408	27.98720157	1.304779588	1.029106438	2289.110534
209112	2010	4.009272938	8	10067	25.95020035	27.0903145	1.197974191	0.87333984	3920.004764
209112	2011	4.206036844	7	10320	25.3943606	26.64196549	0.964865823	0.886925044	3789.509745
209112	2012	4.4642262	5	10568	25.20666632	26.88604096	0.887267397	0.590219263	3223.457293
209112	2013	4.621250781	7	10821	25.83007674	27.48507934	0.994016408	0.929298853	3718.983028
209112	2014	3.710829593	12	11074	25.7575018	27.25086742	1.127412515	0.689509822	4078.48065
209112	2015	5.31975427	8	11336	26.59273617	27.56031493	1.757149303	0.7690357	4310.554557
209112	2016	5.446639699	6	11574	26.60902013	27.88796033	1.344152209	0.950469506	4409.184007
209115	2010	3.23516759	6	3317	26.57959282	27.22021411	1.278558845	0.816361243	1088.285032
209115	2011	3.1019018	7	3316	25.94643165	26.93573845	1.062815372	0.722031326	1266.360325
209115	2012	3.758895789	5	3320	25.83725054	26.9784729	1.089772391	0.978752347	1149.190001
209115	2013	4.005406901	5	3331	26.45368009	27.01489497	1.006968872	0.992674067	1253.845718
209115	2014	2.649945033	6	3340	26.04693734	27.0525265	1.262690446	0.593437209	1504.436844
209115	2015	4.14394107	6	3348	26.96976219	27.0496072	1.700871828	0.712105081	1315.688976
209115	2016	4.704643076	5	3329	26.95674767	27.37589416	1.312259769	0.962899027	1495.846325
209119	2010	3.118720274	6	3339	26.9112942	27.30444295	1.344588946	0.772668064	1084.468355
209119	2011	2.986670993	6	3433	26.37487844	27.12678525	1.180433885	0.727409158	1346.130296
209119	2012	3.673634831	6	3522	26.38328452	27.19438904	1.246058267	0.935564808	1134.775757
209119	2013	3.923063705	6	3612	26.90240991	27.52642407	1.05384219	1.006665755	1178.157746
209119	2014	2.638192098	8	3700	26.37274456	27.18868475	1.234240166	0.602053162	1270.750123
209119	2015	4.034874833	5	3796	27.41285231	27.22204885	1.723232776	0.71273705	1187.832068
209119	2016	4.670886391	7	3881	27.30027308	27.51090664	1.36372209	0.958749632	1200.592638
209126	2010	2.792664161	8	5723	27.23513294	27.79612294	1.349461177	0.848576428	1035.769166
209126	2011	2.637798379	6	5842	26.69732205	27.36366376	1.353192989	0.767535131	1086.216422
209126	2012	3.364849939	8	5955	26.60098747	27.91103848	1.270677501	0.788190485	1108.872741
209126	2013	3.606001626	8	6072	27.1352886	28.00654568	1.127118393	0.945343775	1130.2381
209126	2014	2.292975911	5	6189	26.62705347	27.46820046	1.247108262	0.568892671	1394.932266
209126	2015	3.54275927	9	6312	27.73306946	27.40005098	1.86356148	0.721285701	1222.984793
209126	2016	4.523512032	11	6424	27.51722715	27.65201154	1.422613597	0.77272416	1177.83582
209128	2010	4.007307093	6	10289	26.34976499	27.75650674	1.0886598	0.73155568	1522.148272
209128	2011	3.923679375	6	8529	25.61667294	27.04951816	0.961835301	0.880988623	1925.246576
209128	2012	4.130386425	5	8599	25.45566896	27.21360543	0.914431804	0.764825533	1915.350804
209128	2013	4.273138525	5	8682	26.07944739	27.15827424	0.872085428	0.833145707	2072.224357
209128	2014	2.797029505	5	8757	25.82391599	27.14709914	1.083174718	0.565297411	2108.650572
209128	2015	5.224218923	6	8834	26.70916553	27.69959233	1.567958229	0.635535212	2041.28834
209128	2016	5.628217952	6	8900	26.9492669	28.03437761	1.152395898	0.966592469	2188.174438
209132	2010	4.643601124	13	9738	26.34647775	28.29275415	1.093072494	0.670630931	1122.52315
209132	2011	4.83135795	7	9971	25.78674086	27.64753527	0.98644316	0.843664656	1271.818347
209132	2012	5.101396813	10	10202	25.6266777	27.64192182	0.991593287	0.741393908	1386.0674
209132	2013	5.216230681	7	10435	26.42236063	27.92329162	1.025246833	0.981354442	1359.350242
209132	2014	3.248624706	6	10670	26.02155515	27.93486322	1.248419093	0.634896408	1418.393331
209132	2015	6.105777303	8	10913	26.88887711	28.10318375	1.745176064	0.689267691	1495.2453
209132	2016	6.55345527	9	11135	26.89086388	28.42237698	1.212544875	0.944817374	1578.752655
209142	2010	3.256316291	7	6120	26.10347668	27.13561258	1.267808138	0.795300032	968.6491413
209142	2011	3.39163752	7	6215	25.3914364	26.48370816	1.058338924	0.923475783	1070.169078
209142	2012	4.100615607	6	6307	25.30419123	27.32759489	1.089080319	0.722082282	1152.090564
209142	2013	4.209232559	6	6399	25.91213565	27.75122808	1.098553691	1.000228612	1283.709176
209142	2014	2.678490099	9	6495	25.79774107	27.62960842	1.24175594	0.677600027	1412.396337
209142	2015	4.444726314	8	6595	26.72063944	27.47741958	1.998873719	0.862333529	1402.496153
209142	2016	5.170872799	9	6671	26.55146093	27.94035072	1.285342468	0.979692542	1280.506065
209152	2010	4.172665617	7	4183	25.64992336	26.60068211	1.353806426	1.019861477	16403.9498
209152	2011	4.711067351	8	4278	25.01338081	26.55789528	1.119418982	1.0063304	19541.06415
209152	2012	5.186949008	5	4368	24.89523461	26.91394452	1.139629264	0.849021552	22277.91169
209152	2013	5.128366372	6	4461	25.46159217	27.21467853	1.127764634	0.958228582	23130.3719
209152	2014	3.955913547	8	4556	25.56404649	27.16186076	1.308941977	0.907557112	23752.72483
209152	2015	5.152045955	6	4651	26.31012055	27.46001292	1.731132342	1.04295144	19501.22595
209152	2016	4.881470095	5	4751	26.48283067	27.81563084	1.48517926	1.237991211	12079.05203
209162	2010	2.296238409	8	15643	27.83437928	27.60879542	1.319115051	0.822210537	773.5226641
209162	2011	2.009460951	9	15921	27.43487941	27.31331654	1.84052057	0.720954159	875.8477368
209162	2012	3.182497113	8	16200	27.68881236	28.06908861	1.759026966	0.908244489	874.693861
209162	2013	3.495083729	7	16481	28.32586131	28.0988898	1.346676663	0.921859781	948.3133493
209162	2014	2.037677975	11	16766	27.28629007	27.42445685	1.322233858	0.545854326	989.5236812
209162	2015	3.157091766	18	17058	28.44480174	27.32962684	1.827017117	0.660768881	999.6876516
209162	2016	4.264932954	16	17331	27.87639039	27.7642905	1.547765882	0.746787864	1001.717483
209175	2010	2.846025281	9	11916	27.58980334	27.682644	1.31366121	0.894921411	1376.34621
209175	2011	2.620808212	9	12058	27.20111415	27.52474172	1.418187706	0.716290208	1427.373437
209175	2012	3.846757585	8	12196	27.16007901	27.88166005	1.368316772	1.015506326	1466.148379
209175	2013	4.136241943	8	12333	27.70657379	27.79300419	1.107297064	0.979667074	1579.821265
209175	2014	2.618321871	12	13213	27.09236136	27.558361	1.26693894	0.624493345	1736.876132
209175	2015	4.542582169	9	13374	28.20882709	27.67632739	1.856004658	0.767840591	1591.290296
209175	2016	5.68332596	13	13559	28.00454515	27.93781453	1.527991339	0.914557854	1712.253117
209182	2010	3.755667867	13	22857	26.88218104	27.64896793	1.318579387	0.783714014	1119.938261
209182	2011	3.691260288	15	23331	26.32806877	27.27533507	1.174424712	0.767578795	1308.399639
209182	2012	4.427795012	15	23810	26.22467549	27.66968063	1.131140275	0.838551384	1198.928554
209182	2013	4.705099628	10	24284	26.84308265	28.0315321	0.983279602	1.028376628	1378.563443
209182	2014	2.963188933	16	24769	26.28092541	27.40682792	1.140192515	0.604509082	1513.641875
209182	2015	4.844013748	14	25268	27.5089135	27.57489689	1.822105793	0.726948238	1377.096083
209182	2016	5.696968378	24	25692	27.20577088	27.78913215	1.225469697	0.891451613	1399.008936
209202	2010	1.486027018	20	28337	28.09593421	28.10332071	0.950736425	0.646497474	915.3774045
209202	2011	1.285812676	26	29149	27.17645991	27.87670354	1.414465728	0.857230871	1066.090877
209202	2012	1.85927369	20	29944	28.02804352	28.34361742	1.348174178	0.668604671	1082.341454
209202	2013	2.080536322	20	30726	28.51047303	28.05503351	0.984096131	0.725926232	1190.973495
209202	2014	1.290622535	15	31523	27.5585939	27.94538728	1.032329257	0.481248072	1294.228344
209202	2015	1.683217556	20	32340	27.98476792	27.86939835	1.003297041	0.536156101	1260.477885
209202	2016	2.282740819	23	33130	27.75884638	28.09077961	0.994967504	0.47439257	1390.325794
209212	2010	1.803553565	6	12669	28.29672704	27.66945549	1.195851976	0.877935905	964.4871896
209212	2011	1.572527875	5	12994	27.51700076	27.53450833	1.74613195	0.97011862	1189.43751
209212	2012	2.136637998	6	13169	28.26813807	28.44415809	1.707354048	0.798262061	1055.610891
209212	2013	2.363896312	7	16110	28.83323017	27.75680022	1.20647406	0.837878208	936.7327899
209212	2014	1.608196234	5	16493	27.76188763	27.59849674	1.329517874	0.600059735	1119.043565
209212	2015	2.143558661	7	16865	28.38551707	27.55453645	1.326090118	0.637143297	994.7079071
209212	2016	2.79014451	7	17256	27.95494603	27.82832677	1.136082356	0.631393169	1120.18935
209222	2010	2.191768051	12	27060	28.47634939	28.00059308	1.335648144	0.969524155	1011.19872
209222	2011	1.845781432	18	27772	27.96921788	27.75971074	2.033983589	0.934905701	1016.627369
209222	2012	3.049778267	10	28459	28.33358978	28.92345235	1.911921949	1.032358308	1043.942217
209222	2013	3.314223648	21	29121	29.03151184	27.79096149	1.335564534	1.01338596	1092.945259
209222	2014	1.879289787	15	29801	27.98031403	27.91471546	1.576748232	0.637389534	1225.83761
209222	2015	2.98388255	12	30497	28.9976741	27.72390007	1.741414754	0.791375129	1052.025554
209222	2016	4.197753035	15	31306	28.29514641	28.25217988	1.40623688	0.822654039	1053.258264
209237	2010	4.181533653	9	6374	26.33623413	28.14870052	1.028788488	0.951506879	1144.779327
209237	2011	3.865699764	5	6546	25.66951956	27.44351107	0.932104155	0.883881122	1312.938754
209237	2012	3.761221392	6	6710	25.47568999	27.60928682	0.95919107	0.808597357	1265.176508
209237	2013	3.884538945	7	6869	26.08655655	27.22406964	0.954321289	0.828138567	1370.722331
209237	2014	2.680568539	5	7031	25.78039622	27.47289675	0.983523446	0.539991966	1685.682337
209237	2015	4.895491384	6	7196	26.52649326	27.57827379	1.480337944	0.798259496	1580.84295
209237	2016	5.149708224	6	7405	26.81176405	28.12514347	1.060661145	1.005511316	3414.475458
218032	2010	3.346384133	7	1969	26.47118703	27.34628712	1.341029312	0.887594783	8190.689725
218032	2011	3.491562472	5	1994	26.04010974	26.78951123	1.215971016	0.889847793	9631.658812
218032	2012	4.046174759	5	2023	25.98239446	27.90772323	1.205123699	0.71614736	11473.58883
218032	2013	4.193464016	6	2050	26.3552877	28.22698401	1.120770317	1.044016328	6754.217933
218032	2014	2.903799802	6	2076	26.58712891	28.16827273	1.426442745	0.861078358	5994.158873
218032	2015	4.386470027	7	2104	27.6408553	28.1522941	2.167985311	1.019468489	3777.229537
218032	2016	4.758480104	5	2132	27.0879916	28.77475028	1.482886431	1.114306792	3051.211751
218067	2010	3.417275661	7	5762	25.55558149	26.18693338	1.345424869	1.032682066	4391.114049
218067	2011	3.993271631	6	5880	25.06343115	26.05670947	1.221299156	0.973342259	7418.706499
218067	2012	4.516039646	6	5999	24.97703186	26.70329187	1.183646017	0.88005298	9237.435298
218067	2013	4.356158164	7	6109	25.5669283	26.8135099	1.203279694	0.936422267	7088.464565
218067	2014	3.20318765	8	6220	25.72869337	26.95488433	1.234104323	0.970001376	10539.07923
218067	2015	4.258706384	5	6333	26.56481	27.25542304	1.765292034	1.076845588	11211.04165
218067	2016	4.114771952	8	6472	26.31967595	27.60301613	1.505356935	1.212488701	4353.848356
218082	2010	4.073901844	5	1920	25.97673634	24.93253302	1.477318202	1.074812745	975.5919485
218082	2011	4.87335832	6	1955	25.09805325	24.72851902	1.257041977	1.050581942	1221.826832
218082	2012	5.005156073	6	1993	25.38867523	25.58179436	1.449846402	1.148499944	1297.464636
218082	2013	4.942868465	6	2027	25.98151028	26.41248371	1.408087401	0.891321213	1371.530156
218082	2014	4.021602795	5	2065	25.9778199	25.77267659	1.25202741	0.952267845	1464.07293
218082	2015	5.090435308	5	2098	27.2798932	26.32317843	2.104179689	1.164780319	1484.330329
218082	2016	5.08900756	6	2131	26.62324808	26.46235587	1.658993776	1.483705159	1486.631984
218242	2010	3.373356615	9	15227	25.52554312	24.47762284	1.582178035	1.028779429	1979.611458
218242	2011	4.121877566	11	15439	24.65744276	24.67341185	1.372834256	1.144422241	2036.685328
218242	2012	4.542529482	19	15642	25.1357059	25.23291883	1.496169063	1.153101772	1920.09743
218242	2013	4.297971516	14	15842	25.46093466	25.86199284	1.521083899	0.951240891	2039.687259
218242	2014	3.004551859	12	16039	25.49907807	25.32271175	1.390362181	0.934032621	2323.92233
218242	2015	4.284727293	15	16242	26.87256824	25.61770299	2.102614823	1.209525552	2365.156088
218242	2016	4.141690762	10	16468	26.06796839	26.09643964	1.693883183	1.446198602	2222.630037
218252	2010	3.497978277	6	4660	26.09320404	25.12333462	1.573359795	0.945759423	1067.736562
218252	2011	4.28320616	6	4726	25.20861014	25.19630373	1.309144328	1.079726457	1147.73367
218252	2012	4.767691838	10	4791	25.86091237	25.81173325	1.61296063	1.114532822	1130.629725
218252	2013	4.469715026	5	4851	26.06079217	26.41013997	1.57305142	0.958052901	1270.856945
218252	2014	2.939630131	6	4914	26.06673341	25.8721908	1.387730584	0.922264339	1236.638082
218252	2015	4.402889339	7	4980	27.31839061	26.11738829	2.043295367	1.172251444	1303.874729
218252	2016	4.200506195	6	5046	26.53582826	26.62128478	1.684149983	1.374243615	1242.58217
218275	2010	2.917966396	5	2782	25.54371548	25.70045415	1.357334783	0.969709132	2307.61244
218275	2011	3.437150952	5	2812	25.12632193	25.79830219	1.344258573	0.98817561	4053.26553
218275	2012	3.765278009	5	2840	25.17084645	26.49899532	1.321682029	0.920534982	4807.186381
218275	2013	3.612366665	5	2866	25.69384824	26.49271583	1.32049123	0.944109531	3297.251577
218275	2014	2.570338098	6	2894	25.8068456	26.70121444	1.264850876	1.074433589	6185.881338
218275	2015	3.610378982	6	2922	26.81158193	27.05629189	1.904566943	1.155519666	5956.260084
218275	2016	3.568197432	5	2956	26.08579356	27.17877192	1.47690621	1.260127661	2531.897458
218392	2010	3.921064867	10	5948	25.54608767	25.37136961	1.285556954	1.019424496	2187.637496
218392	2011	4.63168072	7	6049	24.88717653	25.30839945	1.122806237	1.024997689	3168.570022
218392	2012	4.800192055	7	6146	24.98471636	25.90500127	1.28038834	0.980371728	3671.317378
218392	2013	4.651258684	7	6244	25.65268419	26.23823791	1.285662119	0.932118539	2381.368484
218392	2014	3.651257406	7	6342	25.61882301	26.20132151	1.189755717	1.00872989	3852.651045
218392	2015	4.834125098	6	6442	26.49317803	26.6066237	1.743018291	1.097937074	3799.810374
218392	2016	4.727912049	6	6533	26.26328147	26.78568305	1.392541977	1.310861941	2233.444175
218402	2010	3.096331815	10	6611	27.36811511	28.1233898	1.409036085	0.846077997	6001.388071
218402	2011	3.328903423	8	6676	26.83047378	27.44824405	1.26010491	0.985287336	5711.086523
218402	2012	4.061339827	8	6735	26.73189629	28.73919989	1.200591414	0.786100183	5985.487178
218402	2013	4.122216114	12	6800	27.21978044	29.18211875	1.206012623	1.065176534	5814.675998
218402	2014	2.896870202	6	6859	27.19429958	29.1552256	1.403792714	0.809655339	5705.15864
218402	2015	4.580030223	14	6924	28.25184233	28.79893073	2.278519811	1.108484574	5506.626247
218402	2016	5.093971606	10	6986	27.85625852	29.38936373	1.507835794	1.047675207	8590.808108
218417	2010	1.156821566	5	5527	27.56664631	27.89264399	0.63587891	0.448206319	1236.015652
218417	2011	1.031159146	8	5596	26.75111642	27.38344944	0.719895896	0.439414429	1255.843933
218417	2012	1.400402894	11	5660	27.19819564	27.34656985	0.691925052	0.339093979	1303.257458
218417	2013	1.529467916	7	5725	27.50719411	27.45116836	0.564218918	0.347388653	1446.814215
218417	2014	0.997412416	8	5789	27.04223569	27.49701676	0.495606101	0.306083254	1567.497189
218417	2015	1.242769107	10	5857	27.309874	27.40514766	0.569561093	0.371791021	1470.773734
218417	2016	1.656437684	12	5942	27.30035656	27.59392358	0.538253786	0.403682219	1496.538744
218504	2010	2.525707782	7	3212	25.73597369	24.97783164	1.598815706	0.93306846	1112.199146
218504	2011	2.993657522	6	3272	25.05407569	24.93124767	1.380486039	1.039501874	1228.30878
218504	2012	3.372505906	7	3330	25.75637876	25.60306574	1.393855432	1.109040194	1196.105488
218504	2013	3.23749385	6	3389	26.01842172	26.31614013	1.712009487	0.939367026	1277.788602
218504	2014	2.07036772	5	3448	25.99643014	25.85155719	1.358671437	0.964212562	1363.743974
218504	2015	3.138573671	7	3507	27.19540053	26.11702623	1.948956711	1.272415318	1456.7675
218504	2016	3.190048491	6	3559	26.1225238	26.422318	1.736145644	1.444686046	1423.630117
218512	2010	3.093032847	8	3432	26.66478905	27.51746696	1.396734878	0.890822973	1890.546315
218512	2011	3.201325475	10	3461	26.17367656	27.0063516	1.207700202	0.949382147	2232.494425
218512	2012	3.71394374	11	3487	26.21691327	28.18959344	1.280641876	0.765174313	2461.39824
218512	2013	3.867592978	9	3513	26.57106448	28.58950517	1.202303791	1.021995636	2176.175773
218512	2014	2.642518354	11	3543	26.84626551	28.49493885	1.490590427	0.90488535	2745.287772
218512	2015	4.109681982	8	3573	27.80510529	28.38713676	2.216097536	1.071059343	3389.877353
218512	2016	4.573485174	8	3603	27.29387477	28.97532641	1.605806068	1.104236906	2193.217729
218552	2010	3.236224812	7	2931	27.24362645	27.82972164	1.406325818	0.844740389	1181.023766
218552	2011	3.274703361	8	2946	26.68335657	27.27948568	1.187940565	0.947008227	1313.125452
218552	2012	3.703172008	7	2962	26.65479066	28.42651326	1.222845856	0.728502307	1282.806834
218552	2013	3.927715201	8	2977	27.06164598	28.78008679	1.186885291	0.957884296	1372.866975
218552	2014	2.717439305	9	2993	27.20220778	28.75167297	1.422131566	0.81080165	1553.819532
218552	2015	4.226247368	6	3008	28.1383746	28.5400085	2.179915319	1.017372853	1630.420072
218552	2016	4.70330341	8	3032	27.78069577	29.06490829	1.523701403	1.012572616	1551.574691
218612	2010	3.541125723	6	5880	25.59952135	25.16857712	1.413998146	0.97021686	1740.68495
218612	2011	4.195958363	8	5988	25.02572745	25.27459843	1.344103389	1.076782591	2155.35574
218612	2012	4.37837507	9	6091	25.23462095	25.87985465	1.435150714	1.053572669	2578.132029
218612	2013	4.177327206	9	6192	25.83342105	26.1643121	1.400152791	0.954803618	1951.024578
218612	2014	3.03927839	9	6298	25.72394073	26.02751274	1.261853483	1.025822914	2364.550925
218612	2015	4.242508942	5	6403	26.89690969	26.52801843	1.964318702	1.143794766	2749.542906
218612	2016	4.072662749	7	6483	26.14355759	26.80321187	1.448044379	1.370627237	2130.081512
218692	2010	2.718437002	6	2987	25.48853385	25.73784511	1.381295811	0.975730599	1854.16812
218692	2011	3.163301137	8	3031	25.12861281	25.87931883	1.406721525	0.952661216	2858.492519
218692	2012	3.556751377	8	3066	25.25729603	26.63268013	1.340143759	0.925488234	3233.033577
218692	2013	3.457365244	6	3107	25.67756861	26.80322663	1.36753368	0.986938089	2013.052493
218692	2014	2.552065377	5	3147	25.80286024	26.76025446	1.285621302	1.051378251	2833.514907
218692	2015	3.471543567	5	3188	26.77403581	27.21762755	1.870691557	1.172473935	2790.156489
218692	2016	3.402951373	7	3228	26.03739332	27.4630186	1.486871292	1.266741315	2086.229683
218712	2010	2.8199018	6	5756	26.59645398	25.70139132	1.58219793	0.959711627	1255.53141
218712	2011	3.394412935	6	5877	25.97808569	25.5102049	1.484746608	1.007791155	1396.378523
218712	2012	3.765652901	6	5995	26.54168708	26.29391523	1.465882601	1.076244977	1401.815682
218712	2013	3.619586006	10	6110	26.95530259	27.13846896	1.675928389	0.937510105	1448.4898
218712	2014	2.303233333	8	6227	26.77736238	26.79333073	1.328817644	0.951326162	1599.829983
218712	2015	3.616232694	8	6345	28.02830246	27.22401392	2.009693477	1.20424411	1501.434572
218712	2016	3.603257771	8	6454	27.04230215	27.08759087	1.70164659	1.334899276	1477.413509
218807	2010	3.037262333	6	1589	27.24362645	27.82972164	1.406325818	0.844740389	1477.256429
218807	2011	3.247546111	5	1610	26.68335657	27.27948568	1.187940565	0.947008227	1964.698362
218807	2012	3.82828737	6	1629	26.65479066	28.42651326	1.222845856	0.728502307	2064.162375
218807	2013	3.891087054	5	1648	27.06164598	28.78008679	1.186885291	0.957884296	2035.147805
218807	2014	2.47685807	6	1666	27.20220778	28.75167297	1.422131566	0.81080165	2116.267515
218807	2015	4.101044624	7	1685	28.1383746	28.5400085	2.179915319	1.017372853	1688.56955
218807	2016	4.901109918	7	1708	27.78069577	29.06490829	1.523701403	1.012572616	1681.381561
218837	2010	2.974011465	5	2463	26.58026429	25.80376805	1.523925726	0.939118659	1219.734894
218837	2011	3.581660745	6	2495	25.88893327	25.59266399	1.376213306	0.99979933	1342.265048
218837	2012	3.700136628	5	2524	26.428067	26.44148531	1.539425526	1.023202926	1393.958147
218837	2013	3.583153861	5	2555	26.87197219	27.08879599	1.567166835	0.893778796	1476.748033
218837	2014	2.456667675	5	2587	26.65103904	26.77705615	1.315462861	0.919269578	1591.33322
218837	2015	3.672336189	5	2617	27.83004638	27.27268777	1.934488996	1.110835747	1640.714542
218837	2016	3.656411052	5	2641	27.00115219	27.26777145	1.55746053	1.265729047	1609.690352
218842	2010	3.946536938	7	3963	25.90547606	26.9663425	1.361031745	0.995931809	3713.645994
218842	2011	4.518194779	7	4032	25.32234823	26.96026686	1.178731022	0.976518356	5684.826173
218842	2012	5.170578437	5	4099	25.18256746	27.43034703	1.12648893	0.768737481	7507.950193
218842	2013	4.993292522	8	4169	25.71122772	27.7159653	1.248617025	1.060095126	6917.64089
218842	2014	3.613420472	7	4237	25.95854823	27.76715757	1.327383306	0.918923106	9511.931575
218842	2015	4.960855736	7	4304	26.74041468	28.01935112	1.840093391	1.092194181	7707.95436
218842	2016	4.707447861	8	4369	26.62309667	28.42351006	1.553506153	1.258600851	3567.276842
218872	2010	3.83344792	7	3360	26.19012716	26.59611013	1.472027201	1.040524942	3655.947907
218872	2011	4.474523311	7	3420	25.49144222	26.60043128	1.257530737	1.048992976	5001.832442
218872	2012	4.880410599	8	3473	25.45903005	27.10695345	1.303014339	0.910260884	5337.701417
218872	2013	4.873507884	6	3525	26.13696851	27.24688649	1.31882692	0.948882741	4113.006088
218872	2014	3.583952592	7	3581	26.2574051	27.30563449	1.342309273	1.024142966	6328.728421
218872	2015	4.804248908	9	3636	27.09331532	27.60037489	1.902721926	1.117437964	7433.288287
218872	2016	4.595916923	7	3692	27.03165908	28.02681245	1.564658217	1.361056672	3029.075011
218927	2010	3.68396338	6	1643	25.86132901	25.0465552	1.459943909	0.964685696	1365.101475
218927	2011	4.420875073	5	1680	25.22423758	24.84975021	1.344677722	1.009222825	1459.666492
218927	2012	4.515073407	5	1717	25.59121829	25.77352123	1.50411115	1.045902741	1588.57812
218927	2013	4.394638766	5	1750	26.12315445	26.42900984	1.526695936	0.88024202	1763.825513
218927	2014	3.373621993	5	1790	25.99857037	26.03158404	1.210751667	0.925937393	1984.24051
218927	2015	4.533607357	5	1827	27.22118134	26.42616428	2.172703398	1.088047952	1921.722763
218927	2016	4.474176175	5	1860	26.48271944	26.69352052	1.517486066	1.296590419	1551.349396
219014	2010	3.093010202	7	2090	25.66210679	24.75120448	1.422668562	0.979589237	1631.201981
219014	2011	3.797481192	5	2095	24.95107671	24.80109674	1.259872107	1.089745786	1752.497695
219014	2012	4.33540695	5	2105	25.56622984	25.4218245	1.374763766	1.092588178	1803.518633
219014	2013	4.026302085	5	2109	25.8050173	25.9677506	1.538013437	0.961767994	1918.216468
219014	2014	2.536554599	5	2117	25.83566173	25.55951273	1.32219	0.932102516	2000.462048
219014	2015	3.925516941	5	2124	26.96177192	25.83024638	1.885753164	1.185111786	2044.231223
219014	2016	3.79758695	9	2135	26.14372522	26.38543778	1.562242435	1.412527874	1889.355309
219072	2010	3.166098235	14	12461	26.10521625	26.78592062	1.356501611	0.966766141	6600.752655
219072	2011	3.497616442	12	12639	25.56320597	26.31093975	1.213883165	0.90130105	8101.119713
219072	2012	4.062881033	12	12809	25.54253746	27.24288885	1.232497318	0.702600903	10436.43858
219072	2013	4.022413353	17	12972	25.96426125	27.71031703	1.210598899	1.002959982	8315.745876
219072	2014	2.888033565	16	13142	26.14116242	27.65092304	1.268501446	0.936502579	11188.49221
219072	2015	4.075856665	11	13312	27.12209031	27.81011554	2.003277287	1.020383146	10975.10068
219072	2016	4.091444228	12	13480	26.60893714	28.20506169	1.504264259	1.162909641	7604.21223
288092	2010	2.945765495	5	9038	26.49574409	24.91225905	1.59413498	1.051562566	1462.210569
288092	2011	3.605307742	10	9147	25.50670776	25.13251264	1.260218579	1.118888172	1549.138965
288092	2012	4.548941399	8	9255	26.37244073	25.49256813	1.516273122	1.156720245	1660.098565
288092	2013	4.202150546	11	9357	26.25449663	26.26060205	1.839402927	1.009822084	1733.201136
288092	2014	2.524599111	7	9474	26.15989834	25.96218742	1.250215285	1.062694506	1947.712025
288092	2015	4.218483876	12	9586	28.15955848	26.07819652	2.078185283	1.313852906	1930.193949
288092	2016	3.977613853	6	9672	26.72318841	26.50318824	1.843712382	1.484906349	2021.152626
288202	2010	2.523136965	5	8742	24.42244966	22.48125664	1.430338403	1.209494037	1489.888481
288202	2011	3.055791923	6	8887	23.54924803	22.84424157	1.054842114	1.163388213	1614.749001
288202	2012	3.510293959	5	8664	24.36169973	23.04679054	1.38087852	1.221438363	1852.468388
288202	2013	3.149157736	5	8538	24.20402704	23.60799536	1.61249536	1.12613447	1685.867814
288202	2014	2.340500735	7	8762	24.19259718	23.31568256	1.160750172	1.124619548	2089.441564
288202	2015	3.283080525	5	8897	25.64199702	23.31477046	1.66647449	1.292937276	1855.540497
288202	2016	3.055789683	6	9018	24.67284804	24.0666054	1.522767276	1.628759206	1860.162095
288272	2010	3.666262337	54	87937	24.63552173	23.18452165	1.292479547	1.104338776	4349.345225
288272	2011	4.410936173	62	89714	23.63264567	23.43517958	1.003238097	1.172934955	4793.470769
288272	2012	5.076629044	73	91454	24.27983816	23.78612532	1.472747979	1.215681597	5525.125338
288272	2013	4.687822591	91	93123	24.47348846	24.43911783	1.52693813	1.108290886	4988.578723
288272	2014	3.406709213	87	94484	24.41781868	24.05755212	1.181720064	1.063489825	5374.181897
288272	2015	4.777583735	92	96114	25.95040387	24.26041285	1.795500803	1.297541451	5428.44763
288272	2016	4.457027891	117	97919	25.13973093	24.84195749	1.587153445	1.482480423	4490.864653
288392	2010	2.078055682	6	7433	26.9973968	24.50094752	1.659088524	1.193262813	1306.240032
288392	2011	2.42490021	8	7584	26.11824886	24.9081112	1.223891625	1.196084107	1337.953473
288392	2012	2.876098024	6	7732	26.85199344	25.20899726	1.486518618	1.320964486	1426.979719
288392	2013	2.748441126	6	7040	26.64745826	25.96222171	1.923432207	1.114060499	1555.080979
[truncated: 7,017 more rows]
